# Supplementary material for: Appropriateness of initial dose of non-vitamin K antagonist oral anticoagulants in patients with non-valvular atrial fibrillation in the UK
Source: PubMed Central journal article supplement — BMJ Open. 2019 Sep 20;9(9):e031341. doi: 10.1136/bmjopen-2019-031341 (PMC6756330; doi:10.1136/bmjopen-2019-031341), 2019-09-20
Supplement: bmjopen-2019-031341.draft_revisions.pdf [file bmjopen-2019-031341.draft_revisions.pdf]

# BMJ Open

BMJ Open is committed to open peer review. As part of this commitment we make the peer review history of every article we publish publicly available.

When an article is published we post the peer reviewers' comments and the authors' responses online. We also post the versions of the paper that were used during peer review. These are the versions that the peer review comments apply to.

The versions of the paper that follow are the versions that were submitted during the peer review process. They are not the versions of record or the final published versions. They should not be cited or distributed as the published version of this manuscript.

BMJ Open is an open access journal and the full, final, typeset and author-corrected version of record of the manuscript is available on our site with no access controls, subscription charges or pay-per-view fees (<http://bmjopen.bmj.com>).

If you have any questions on BMJ Open's open peer review process please email [info.bmjopen@bmj.com](mailto:info.bmjopen@bmj.com)

# BMJ Open

## Appropriateness of initial dose of Non-Vitamin K Antagonist Oral Anticoagulants in Patients with Non-Valvular Atrial Fibrillation in the United Kingdom: a Population-Based Observational Study using Primary Care Electronic Health Records

|                               |                                                                                                                                                                                                                                                                                                                                                                                                       |
|-------------------------------|-------------------------------------------------------------------------------------------------------------------------------------------------------------------------------------------------------------------------------------------------------------------------------------------------------------------------------------------------------------------------------------------------------|
| Journal:                      | <i>BMJ Open</i>                                                                                                                                                                                                                                                                                                                                                                                       |
| Manuscript ID                 | bmjopen-2019-031341                                                                                                                                                                                                                                                                                                                                                                                   |
| Article Type:                 | Research                                                                                                                                                                                                                                                                                                                                                                                              |
| Date Submitted by the Author: | 29-Apr-2019                                                                                                                                                                                                                                                                                                                                                                                           |
| Complete List of Authors:     | García Rodríguez, Luis; Spanish Centre for Pharmacoepidemiologic Research (CEIFE),<br>Martín-Pérez, Mar<br>Vora, Pareen; Bayer AG<br>Roberts, Luke; Bayer plc<br>Balabanova, Yanina; Bayer AG<br>Brobert, Gunnar; Bayer AB<br>Fatoba, Samuel; Bayer plc<br>Suzart-Woischnik, Kiliana; Bayer AG<br>Schaefer, Bernhard; Bayer AG<br>Ruigomez, Ana; Spanish Centre for Pharmacoepidemiological Research, |
| Keywords:                     | Thromboembolism < CARDIOLOGY, Cardiac Epidemiology < CARDIOLOGY, EPIDEMIOLOGY                                                                                                                                                                                                                                                                                                                         |
|                               |                                                                                                                                                                                                                                                                                                                                                                                                       |

SCHOLARONE™  
Manuscripts

1  
2  
3 **Appropriateness of initial dose of Non-Vitamin K Antagonist Oral Anticoagulants in**

4  
5  
6 **Patients with Non-Valvular Atrial Fibrillation in the United Kingdom:**

7  
8 **a Population-Based Observational Study using Primary Care Electronic Health Records**

9  
10 Luis A García Rodríguez,<sup>1</sup> Mar Martín-Pérez,<sup>1</sup> Pareen Vora,<sup>2</sup> Luke Roberts,<sup>3</sup> Yanina

11  
12 Balabanova,<sup>2</sup> Gunnar Brobert,<sup>4</sup> Samuel Fatoba,<sup>3</sup> Kiliانا Suzart-Woischnik,<sup>2</sup> Bernhard

13  
14 Schaefer,<sup>2</sup> Ana Ruigómez<sup>1</sup>

15  
16  
17  
18  
19  
20  
21 **Short title:** Appropriate dosing of NOACs in the UK

22  
23  
24  
25  
26 <sup>1</sup>Spanish Centre for Pharmacoepidemiologic Research (CEIFE), Madrid, Spain

27  
28 <sup>2</sup>Bayer AG, Berlin, Germany

29  
30 <sup>3</sup>Bayer PLC, Reading UK

31  
32 <sup>4</sup>Bayer AB, Stockholm, Sweden

33  
34  
35  
36  
37 **Corresponding author:** Luis A García Rodríguez, Spanish Centre for Pharmacoepidemiologic

38  
39 Research (CEIFE), Almirante 28; 28004 Madrid, Spain, Tel: +34-91-531 3404, Fax: +34-91-531

40  
41  
42 2871, email: lagarcia@ceife.es

43  
44  
45 **Word count:** 3264

## ABSTRACT

**Objective:** To evaluate the appropriateness of the initial prescribed daily dose of non-vitamin K antagonist oral anticoagulants (NOACs) according to label in patients with non-valvular atrial fibrillation (NVAF) in the United Kingdom (UK).

**Design:** Population-based cross-sectional study

**Setting:** United Kingdom (UK) primary care

**Population:** 30,467 patients with NVAF and a first prescription for apixaban, dabigatran or rivaroxaban between January 2011 and December 2016.

**Main outcome measures:** Percentage of patients prescribed NOAC dose according to the European Union [EU] labels (appropriately dosed), and not according to the EU labels (inappropriately dosed – including both underdosed and overdosed patients); percentage of patients prescribed an initial NOAC dose according to renal function status.

**Results:** A total of 15,252 (50.1%) patients started NOAC therapy on rivaroxaban, 10,834 (35.6%) on apixaban and 4381 (14.4%) on dabigatran. Among patients starting NOAC therapy on rivaroxaban, 17.3% were eligible to receive a reduced dose compared with 12.8% of patients starting on apixaban and 53.8% of patients starting on dabigatran. The majority of patients were prescribed an appropriate dose according to the EU labels: apixaban 74.9 %, dabigatran, 74.4%; rivaroxaban, 84.2%. Underdosing occurred in 21.6% (apixaban), 8.7% (dabigatran), 9.1% (rivaroxaban). Overdosing was more frequent for dabigatran (16.9%) than for rivaroxaban (6.6%) or apixaban (3.5%). There was a trend towards dose reduction with increasing renal impairment. Among patients with severe renal

1  
2  
3 impairment, the majority received a reduced dose NOAC: apixaban, 91.1%, dabigatran,  
4  
5 80.0%, rivaroxaban, 83.0%.  
6  
7

8 **Conclusion:** Between 2011 and 2016, the majority of patients starting NOAC therapy in UK  
9  
10 primary care were prescribed a daily dose in line with the approved EU drug label.  
11  
12 Underdosing was more than twice as common among patients starting on apixaban than  
13  
14 those starting on dabigatran or rivaroxaban.  
15  
16  
17  
18  
19  
20  
21  
22  
23  
24  
25  
26  
27  
28  
29  
30  
31  
32  
33  
34  
35  
36  
37  
38  
39  
40  
41  
42  
43  
44  
45  
46  
47  
48  
49  
50  
51  
52  
53  
54  
55  
56  
57  
58  
59  
60

For peer review only

## STRENGTHS AND LIMITATIONS OF THE STUDY

- Our study is the first to comprehensively evaluate the appropriateness of the initial prescribed daily dose of NOACs to patients with NVAF in the UK according to the approved EU drug labels, and the largest of its kind worldwide.
- Our large sample size was derived from two population-based data sources representative of the UK general population
- A small degree of misclassification for renal function and bodyweight may have occurred due to inaccuracies in data recording, which may have affected our findings for a small proportion of patients.
- Potential overdosing may have been overestimated because patients may have split a prescribed standard dose over more than one day.

## INTRODUCTION

Recent years have seen a rapid increase in the proportion of patients with atrial fibrillation (AF) starting anticoagulant therapy with a non-vitamin K antagonist oral anticoagulant (NOAC), replacing use of vitamin K antagonists (VKAs) as leading oral anticoagulant (OAC) therapy, both in the United Kingdom (UK),<sup>1-3</sup> and elsewhere in Europe.<sup>4-7</sup> Decisions to prescribe standard or reduced dose NOACs are made on the basis of specific considerations such as age, weight, renal function, and use of specific concomitant medications. Descriptive data show that a high proportion of patients with AF initiating anticoagulant therapy with a NOAC are prescribed a reduced dose,<sup>8-10</sup> particularly in Europe,<sup>8,9</sup> with evidence to suggest that many of these patients do not satisfy the necessary dose reduction criteria as specified on the drug labels.<sup>10-14</sup> In Europe, studies describing the appropriate dosing of prescribed NOACs have been conducted in smaller cohorts<sup>8,12-14</sup> and/or limited to a particular drug,<sup>8,14</sup> and we are unaware of any conducted in patients with NVAF in the UK. Therefore, using routinely-collected primary care electronic health records (EHRs), we conducted a large population-based study to evaluate the level of appropriate prescribing (consistency with the approved drug label) of standard and reduced dose NOACs in over 30,000 patients with NVAF initiating therapy with a NOAC between 2011 and 2016. To our knowledge, our study is the largest of its kind among patients with AF in routine clinical practice worldwide.

## METHODS

### Data sources

We used data from The Health Improvement Network (THIN) and the Clinical Practice Research Datalink (CPRD)-GOLD in the UK – two similarly structured validated databases of anonymized primary care EHRs representative of the UK demographic.<sup>15-18</sup> The databases

1  
2  
3 hold clinical and prescribing information entered by primary care practitioners (PCP) as part  
4  
5 of routine patient care, and cover approximately 5% and 7% of the UK population,  
6  
7 respectively. The study protocol were approved by independent Scientific Research  
8  
9 Committees (reference SRC 17THIN014 for THIN, and ISAC 17\_020R for CPRD).  
10  
11  
12  
13  
14

### 15 **Study population**

16  
17 We identified patients aged 18 years with a first recorded prescription (index date) for  
18  
19 apixaban, dabigatran or rivaroxaban between 01 January 2011 and 31 December 2016.  
20  
21 Patients were required to have been registered with a PCP for at least 1 year before their  
22  
23 first NOAC prescription and have at least 1 year prescription history. We subsequently  
24  
25 identified patients with NVAF as those with a record of AF any time before the index date or  
26  
27 in the 2 weeks after, and with no record of heart valve replacement or mitral stenosis during  
28  
29 this time. We excluded patients with a record of deep vein thrombosis, pulmonary  
30  
31 embolism, or hip/knee replacement surgery in the 3 months before the index date because  
32  
33 these could all have been alternative reasons for NOAC initiation. As some practices  
34  
35 contribute data to both THIN and CPRD, we included all practices contributing to THIN and  
36  
37 those exclusively contributing to CPRD. To identify and exclude duplicated practices,  
38  
39 matching of anonymized patient characteristics was applied.<sup>19 20</sup>  
40  
41  
42  
43  
44  
45  
46  
47  
48  
49

### 50 **NOAC study cohorts**

51  
52 Three mutually exclusive cohorts were identified based on the first prescribed NOAC (index  
53  
54 NOAC), either dabigatran (a direct thrombin inhibitor), apixaban or rivaroxaban (both direct  
55  
56 factor Xa inhibitors). Edoxaban – another direct factor Xa inhibitor – was only relatively  
57  
58 recently approved by the EMA and recommended by NICE (June and September 2015,  
59  
60



1  
2  
3 respectively), therefore we anticipated prescribing levels would not be sufficiently high for  
4  
5 robust analysis and thus excluded new users of edoxaban. Identification of the study  
6  
7 cohorts is depicted in (**Supplementary Figure 1.**) Patients who were prescribed two  
8  
9 different NOACs on the same day were excluded. Patients qualifying as a new user of more  
10  
11 than one NOAC during the study period with different index dates (i.e. switchers), were  
12  
13 assigned to the cohort of the first prescribed NOAC. Patients were categorised as OAC non-  
14  
15 naïve if they had a prescription for any oral anticoagulant before their index NOAC (or a  
16  
17 clinical entry implying previous use of any oral anticoagulant, warfarin monitoring or  
18  
19 international normalized ratio >2), otherwise they were considered to be OAC-naïve.  
20  
21  
22  
23  
24  
25  
26  
27

### 28 **Renal function and other patient characteristics**

29  
30 We extracted data on the initial daily dose of the index NOAC, as well as patients' age, renal  
31  
32 function and weight at the time of the index date, using the most recently recorded values.  
33  
34 Patients' renal function was ascertained using the closest valid serum creatinine value to the  
35  
36 index date (within the year before) to estimate glomerular filtration rate (eGFR) expressed  
37  
38 as mL/min/1.73m<sup>2</sup> applying the Chronic Kidney Disease Epidemiology Collaboration  
39  
40 equation,<sup>21</sup> but omitting ethnicity because this is not routinely recorded in UK primary care.  
41  
42 Individuals with no valid serum creatinine measurement were assigned to a category  
43  
44 'unknown'. Information on lifestyle variables (smoking status and body mass index [BMI])  
45  
46 was collected, using the most recently recorded value/status before the index date.  
47  
48  
49  
50  
51 CHA<sub>2</sub>DS<sub>2</sub>Vasc score for stroke risk was calculated according to patients' recorded history of  
52  
53 congestive heart failure, hypertension, age, diabetes mellitus and prior stroke/transient  
54  
55 ischaemic attack (CHADS score was also calculated because this was assessed in the pivotal  
56  
57 studies for the NOACs investigated in this study). HAS-BLED score for major bleeding risk  
58  
59  
60

1  
2  
3 was calculated using recorded history of hypertension, renal disease, liver disease, stroke  
4  
5 history, prior major bleeding or predisposition to bleeding, age >65 years, medication use  
6  
7 predisposing to bleeding, and alcohol use. We also estimated frailty using an adaptation of a  
8  
9 frailty index developed from data recorded in primary care databases,<sup>22</sup> and categorised  
10  
11 patients as fit, mildly frail, moderately frail or severely frail.  
12  
13  
14  
15  
16  
17  
18  
19

### 20 **Recommendations for NOAC dosing**

21  
22 We categorised patients as eligible for standard or reduced dose NOAC therapy or ineligible  
23  
24 for NOAC therapy (i.e. contraindicated) based on all information in the approved European  
25  
26 Union (EU) label for each respective NOAC, adapted to the information recorded in the  
27  
28 databases (**Supplementary Table 1**). For the prevention of stroke and systemic embolism in  
29  
30 adults with NVAf, the recommended standard dosages according to the EU labels are 5 mg  
31  
32 twice daily for apixaban, 150 mg twice daily for dabigatran and 20 mg once daily for  
33  
34 rivaroxaban; the recommended reduced dosages are 2.5 mg twice daily for apixaban,  
35  
36 110 mg twice daily for dabigatran and 15 mg once daily for rivaroxaban. Hereafter, for  
37  
38 simplicity, we refer to these dosages as 'daily dose'. Dose reduction recommendations for  
39  
40 rivaroxaban are based on renal function, while dose reduction for dabigatran considers  
41  
42 renal function, age, concomitant medications and other comorbidities. For apixaban, at  
43  
44 least two of the following criteria are to be met for dose reduction:  $\geq 75$  years, body weight  
45  
46  $\geq 75$  kg, serum creatinine  $\geq 1.5$  mg/dL. Also, patients with renal impairment creatinine  
47  
48 clearance 15-29 mL/min patients are recommended to receive the reduced dose of  
49  
50 apixaban. We defined appropriate dosing as a patient being prescribed the correct  
51  
52 recommended dose based on the approved EU label. Potential inappropriate dosing was  
53  
54  
55  
56  
57  
58  
59  
60

1  
2  
3 defined as a patient being prescribed a dose not in line with the EU label – this included  
4  
5 both underdosed patients (prescribing of a reduced dose NOAC to patients eligible for a  
6  
7 standard dose) and overdosed patients (prescribing of a higher dose than recommended or  
8  
9 any dose when contraindicated).  
10  
11  
12

### 13 **Statistical analysis**

14  
15  
16 Patient characteristics were described according to the daily dose of the index NOAC  
17  
18 (standard or reduced), using frequency counts and percentages for quantitative variables,  
19  
20 and means with standard deviation (SD) for continuous variables. For each NOAC cohort, we  
21  
22 calculated the percentage of patients appropriately dosed, both overall and according to  
23  
24 whether the daily dose of the index NOAC was a standard or reduced dose. To determine if  
25  
26 NOAC prescription patterns were influenced by renal status alone, we further evaluated the  
27  
28 initial daily dose prescribed according to renal function, categorised as normal (eGFR >50  
29  
30 mL/min/1.73 m<sup>2</sup>), mild-to-moderate impairment (eGFR 30–50 mL/min/1.73 m<sup>2</sup>) and severe  
31  
32 impairment (eGFR <30 mL/min/1.73 m<sup>2</sup>). All analyses were undertaken using STATA version  
33  
34  
35  
36  
37  
38 12.0.  
39  
40

### 41 **Patient and public involvement**

42  
43 This was a descriptive study using routinely collected primary care data in the UK. There was  
44  
45 no public or patient involvement in the conception of the research question, the design and  
46  
47 implementation of the study, or the writing of the manuscript.  
48  
49  
50  
51

## 52 **RESULTS**

53  
54  
55 During the study period, there were a total of 30,467 new users of a NOAC with a record of  
56  
57 NVAf and no other recent indication for anticoagulation; 10,834 (35.6%) started on  
58  
59 apixaban, 4381 (14.4%) started on dabigatran, and 15,252 (50.1%) started on rivaroxaban.  
60

### Patient characteristics by daily dose at index NOAC prescription

Characteristics of the study cohorts stratified by the daily dose of the index NOAC prescription (standard or reduced) are shown in **Table 1**. The most common starting NOAC dose was the standard 10 mg for apixaban (65.2% of patients) and the standard 20 mg for rivaroxaban (79.3% of patients). For dabigatran, the standard dose of 300 mg was not the most commonly prescribed initial dose, being slightly less frequently prescribed than a reduced dose of 220 mg (46.1% vs. 47.2%)(see **Supplementary Table 2** for a complete breakdown of the initial NOAC dose prescribed). A reduced starting NOAC dose was used in the majority of patients with impaired renal function. Among patients receiving a standard dose, the apixaban cohort had the highest proportion of OAC-naïve patients (55.4% vs. 45% for dabigatran and 48.6% for rivaroxaban). Most patients prescribed a standard dose had normal renal function (apixaban, 75.4%; dabigatran 80.5%; rivaroxaban, 79.0%). The majority of patients prescribed a reduced dose were aged 70 years or older (apixaban, 93.6%; dabigatran, 88.4%; rivaroxaban, 91.4%), and were moderately or severely frail (apixaban, 70.2%; dabigatran, 61.7%; rivaroxaban, 74.0%). Bleeding risk (according to the HAS-BLED score) was similar between the three cohorts, and was higher among patients prescribed reduced NOAC doses (mean 2.0, SD 0.9) than among patients receiving standard doses (mean 1.6; SD 0.9). Approximately three quarters of the patients in each cohort who were prescribed a reduced dose had a high stroke risk index (CHA2DS2VASc score of  $\geq 3$ ).

### Overall appropriateness of index NOAC daily dose

**Figure 1** presents the percentage of patients appropriately dosed, underdosed and overdosed among all patients in each study cohort. The majority of patients (76.9%) starting NOAC therapy were prescribed an appropriate dose; 74.9% of patients on apixaban, 74.4%

1  
2  
3 on dabigatran and 84.2% on rivaroxaban. Underdosing was more frequent in the apixaban  
4 cohort (21.6% of patients) than in the dabigatran (8.7% of patients) and rivaroxaban (9.1%)  
5 cohorts. Overdosing, however, was more frequent in the dabigatran cohort (16.9%) than in  
6 the rivaroxaban (6.6%) or apixaban (3.5%) cohorts.  
7  
8  
9  
10  
11  
12  
13  
14

### 15 **Appropriateness of NOAC prescription by eligibility to receive a standard or reduced dose**

16  
17 As shown in **Table 2**, the majority of patients in the apixaban and rivaroxaban cohorts were  
18 eligible to receive the standard treatment dose, 84.9% (9194/10,834) for apixaban and  
19 82.7% (12,608/15,252) for rivaroxaban, while in the dabigatran cohort less than half (40.9%;  
20 1790/4381) were eligible for the standard dose. The percentage of users eligible to receive  
21 the reduced treatment dose was 12.8% for apixaban, 53.8% for dabigatran and 17.3% for  
22 rivaroxaban. Among all patients eligible to receive a standard dose NOAC (N=23,591), the  
23 majority received the correct standard dose (82.3%); this percentage was highest for  
24 rivaroxaban (88.5%) followed by dabigatran (78.7%) and apixaban (74.5%). However, a  
25 quarter of apixaban patients (25.5%, 2344/9194) eligible to receive the recommended  
26 standard daily dose were prescribed a reduced dose, compared with 21.3% (381/1790) in  
27 the dabigatran cohort and 11.0% (1390/12,608) in the rivaroxaban cohort. Among patients  
28 inappropriately prescribed a reduced dose of apixaban (n=2344), 73.1% met only one dose-  
29 reduction criteria with the remaining meeting no dose-reduction criteria. Among patients  
30 eligible for reduced dosing, the majority correctly received a reduced dose: apixaban  
31 (91.0%), dabigatran (78.4%) and rivaroxaban (63.9%).  
32  
33  
34  
35  
36  
37  
38  
39  
40  
41  
42  
43  
44  
45  
46  
47  
48  
49  
50  
51  
52  
53  
54  
55  
56  
57  
58  
59  
60

### Appropriateness of NOAC prescription among patients prescribed a standard or reduced dose

Among patients starting NOAC therapy on a standard daily dose, the prescription was appropriate for the vast majority of those in the apixaban cohort (97.0%) and rivaroxaban cohort (92.3%), but for fewer patients in the dabigatran cohort (69.8%) (**Supplementary Figure 2**). Among patients starting NOAC therapy on a reduced dose, this was appropriate in only 33.4% of patients in the apixaban cohort compared with 78.2% of the dabigatran cohort and 54.7% of the rivaroxaban cohort (**Supplementary Figure 2**).

### Dosing by degree of renal impairment

The daily dose of the index NOAC prescription according to renal function is shown in **Figure 2** (approximately 1 in 8 patients in each cohort had unknown renal function). In all three cohorts, there was a trend towards dose reduction with increasing renal impairment. Among patients with severe renal impairment (eGFR<30 mL/min /1.73 m<sup>2</sup>), most were prescribed a reduced daily dose: apixaban (91.1%, 127/139), dabigatran (80.0%, 102/127 mg) and rivaroxaban (83.0%, 15 mg). However, reduced doses were also prescribed to patients with no evidence of renal impairment, especially among the dabigatran cohort (50.1%, 1634/3259; mostly 220 mg/day) followed by apixaban (26.7% (1968/7291; nearly all 5 mg/day), and least frequently for rivaroxaban (10.3%, 1105/10,699; mostly 15 mg/day) users.

### NOAC daily dose over time

As shown in **Supplementary Table 3**, among patients with at least 6 months of follow-up and still prescribed a NOAC at 6 months, the vast majority were prescribed the same dose of

1  
2  
3 the index NOAC at 6 months (95.4% for apixaban, 93.7% for dabigatran and 94.5% for  
4 rivaroxaban). Among patients whose were underdosed at the index date and who also had  
5 at least 6 months of follow-up, the majority still received an underdosed prescription 6  
6 months after their initial underdosed prescription: apixaban 90.2%, dabigatran 82.0% and  
7 rivaroxaban 84.6%.

## 18 **DISCUSSION**

19  
20 Between 2011 and 2016, the majority of patients with NVAF starting therapy with a NOAC in  
21 UK primary care were prescribed an appropriate daily dose based on the approved EU label,  
22 according to the information recorded in THIN and CPRD-GOLD. However, notable  
23 differences were seen in the level of underdosing between individual NOACs, being more  
24 than twice as frequent among patients starting treatment on apixaban compared with those  
25 starting on dabigatran or rivaroxaban.

26  
27  
28  
29  
30  
31  
32  
33  
34  
35  
36  
37 Our study is the first to comprehensively evaluate the appropriateness of the initial  
38 prescribed daily dose of NOACs to patients with NVAF in the UK according to the approved  
39 EU drug labels, and the largest of its kind worldwide. Also, we are unaware of other studies  
40 that have compared levels of potential underdosing and overdosing between individual  
41 NOACs. The large sample from two population-based data sources representative of the UK  
42 general population is a key strength, as is the fact that all medications prescribed by the PCP  
43 will have been captured because they are automatically recorded upon issue. In terms of  
44 our study's limitations, we evaluated the dose of the first NOAC prescription issued in  
45 primary care and not subsequent prescriptions; however, the majority of patients had  
46 continued on the same dose of the index NOAC 6 months after treatment initiation. A small

1  
2  
3 degree of misclassification for renal function and bodyweight may have occurred due to  
4  
5 inaccuracies in data recording, which may have affected our findings for a small proportion  
6  
7 of patients. Also, potential overdosing may have been overestimated because patients may  
8  
9 have split a prescribed standard dose over more than one day.  
10  
11  
12  
13

14  
15 Potential underdosing of NOACs has been reported in moderate-to-large studies from the  
16  
17 US,<sup>10 11</sup> as well as in smaller studies from Europe and North America.<sup>12-14</sup> Using data from  
18  
19 7925 patients with AF in the Outcomes Registry for Better Informed Treatment of Atrial  
20  
21 Fibrillation II (ORBIT-AF II) registry, Steinberg *et al*,<sup>10</sup> reported that 57% (734/1289) of  
22  
23 patients prescribed a reduced dose NOAC did not fulfill the Food and Drug Administration's  
24  
25 (FDAs) recommended criteria for dose reduction. A larger administrative claims database  
26  
27 study of 14,865 patients with AF initiating NOAC treatment reported a much lower level of  
28  
29 underdosing with 13.3% (1781/13,392) of patients with no renal indication for dose  
30  
31 reduction receiving a reduced dose;<sup>11</sup> although other criteria for dose reduction were not  
32  
33 assessed. In our analyses, the percentage of patients receiving a reduced dose differed  
34  
35 between the individual NOACs, occurring more than twice as frequently among patients  
36  
37 prescribed apixaban or dabigatran than those prescribed rivaroxaban, possibly reflecting the  
38  
39 additional criteria for dose reduction for the former two NOACs. Studies from Europe have  
40  
41 been small but also suggest that underdosing may be more prevalent for apixaban than  
42  
43 rivaroxaban. In Germany, Bucholtz *et al*<sup>8</sup> found that among 268 patients with NVAF starting  
44  
45 reduced dose apixaban therapy in 2016, 60.8% did not meet labelling criteria for dose  
46  
47 reduction, while in a study of 899 patients with NVAF starting rivaroxaban therapy in the  
48  
49 Netherlands, Pisters *et al*<sup>14</sup> reported that 3.1% received a label-discordant dose. In the US,  
50  
51 Yao *et al*<sup>11</sup> found that 43% of patients with a renal indication for NOAC dose reduction did  
52  
53  
54  
55  
56  
57  
58  
59  
60



1  
2  
3 not receive a reduced dose, while Steinberg *et al*<sup>10</sup> found that 32% of NVAf patients eligible  
4 for dose reduction according to the FDA approved drug labels received a standard dose  
5  
6 NOAC. This is similar to the level of potential rivaroxaban overdosing in our study. Whether  
7  
8 differences in levels of inappropriate prescribing between studies relates to differences  
9  
10 between study populations or completeness of data in the information sources is unclear,  
11  
12 but patients in our study were on average 4 years older than those in the ORBIT-II registry  
13  
14 (75 vs. 71 years) and previous gastrointestinal bleeding was more frequent (14% vs. 4%).  
15  
16  
17

18  
19  
20  
21  
22 Inappropriate dosing of NOACs has concerning clinical implications because patients may  
23  
24 not receive the benefits of the recommended NOAC dose in protecting against stroke and  
25  
26 systemic embolism. Data from the ORBIT-II registry suggest that patients receiving an  
27  
28 inappropriately reduced NOAC dose have less favourable outcomes in terms of  
29  
30 thromboembolic events and death.<sup>10</sup> Yao *et al*<sup>11</sup> found that among apixaban-treated  
31  
32 patients with no renal justification for dose reduction, those receiving the reduced dose had  
33  
34 a significantly higher risk of stroke with no significant change in the risk of bleeding when  
35  
36 compared with those receiving the standard dose. Reasons why PCPs prescribe reduced  
37  
38 NOAC doses to patients with no justification for dose reduction are unclear. It is possible  
39  
40 that NOAC-related bleeding may be more concerning to physicians than reduced stroke  
41  
42 prophylaxis. Although, contrary to expectations, Steinberg *et al*<sup>10</sup> found that patients  
43  
44 inappropriately prescribed a reduced dose of a NOAC were significantly younger and had  
45  
46 lower bleeding scores than those appropriately dose-reduced. In our study, we saw a trend  
47  
48 of dose reduction with worsening renal function. In addition, the majority of patients  
49  
50 started on a reduced dose NOAC were moderately or severely frail. It is therefore possible  
51  
52 that some PCPs are exercising caution among patients with renal function values close to  
53  
54  
55  
56  
57  
58  
59  
60

1  
2  
3 the qualifying cut-offs and/or among frail individuals. For apixaban, being close to the cut-  
4  
5 offs for age and bodyweight could also influence prescribing In the study by Bucholtz *et al*<sup>8</sup>  
6  
7 there were 163 apixaban patients who received a reduced dose despite being eligible for  
8  
9 the higher dose, and among these a substantial percentage met either only one (57.1%) or  
10  
11 no (42.9%) dose-reduction criteria, with these patients more often having ages, weights and  
12  
13 serum creatinine levels close to the cut-off values compared with patients prescribed an  
14  
15 appropriate dose. In our study, the majority (73.1%) of patients inappropriately prescribed a  
16  
17 reduced dose of apixaban met only one dose reduction criteria. Our findings also pointed to  
18  
19 some potential overdosing of NOACs, and as shown by others to increase bleeding risk.<sup>11</sup>  
20  
21 Notwithstanding our study's limitation in assessing overdosing, the possibility of overdosing  
22  
23 prescribing habits among some UK PCPs cannot be excluded.  
24  
25  
26  
27  
28  
29  
30  
31

32  
33 Our findings underscore the importance of monitoring the prescribing of NOACs in the post-  
34  
35 marketing period. Further research is warranted into reasons for the inappropriate  
36  
37 prescribing of reduced and standard dose NOACs in UK primary care, the impact this has on  
38  
39 risks of clinical outcomes, including stroke, systemic embolism and major bleeding in this  
40  
41 setting, and ways to improve levels of correct dosing to ensure patients receive maximum  
42  
43 benefit from treatment.  
44  
45  
46  
47  
48  
49

#### 50 **ACKNOWLEDGEMENTS**

51  
52 This study was funded by Bayer AG. We thank Susan Bromley, EpiMed Communications Ltd  
53  
54 (Oxford, UK) for medical writing assistance funded by Bayer AG.  
55

56  
57 **Funding:** This work was supported by Bayer AG.  
58  
59  
60

1  
2  
3 **Competing interests:** PV, YB, KS-W and BS are employees of Bayer AG (Germany), the  
4  
5 funder of the study; GB is an employee of Bayer AB, (Stockholm, Sweden); LR and SF are  
6  
7 employees of Bayer PLC (Reading, UK). KS-W declares Bayer stocks; LR and SF declare shares  
8  
9 in Bayer. LAGR, MM-P and AR work for the Spanish Centre for Pharmacoepidemiologic  
10  
11 Research (Madrid, Spain), which has received research funding from Bayer AG. LAGR also  
12  
13 declares honoraria for serving on advisory boards for Bayer AG.  
14  
15

16  
17 **Author contributions:** LR and SF developed the concept for the research study. LR, SF, LAGR,  
18  
19 AR, GB, PV, KS and YB planned the study. AR, MM-P and LAGR conducted the study. All  
20  
21 authors interpreted the data, reviewed drafts of the manuscript, and approved the final  
22  
23 version of the article for publication.  
24  
25

26  
27 **Data sharing:** Data are available from the corresponding author upon reasonable request.  
28  
29

## 30 31 32 REFERENCES

- 33  
34  
35 1. Loo SY, Dell'Aniello S, Huiart L, et al. Trends in the prescription of novel oral  
36  
37 anticoagulants in UK primary care. *Br J Clin Pharmacol* 2017;83(9):2096–106.  
38  
39  
40 2. Ruigomez A, Brobert G, Vora P, et al. Trends in use of rivaroxaban for prophylaxis and  
41  
42 treatment in general practice in the United Kingdom between 2012 and 2015.  
43  
44 *Pharmacoepidemiology and Drug Safety* 2018;27(S2)  
45  
46  
47 3. Vinogradova Y, Coupland C, Hill T, et al. Risks and benefits of direct oral anticoagulants  
48  
49 versus warfarin in a real world setting: cohort study in primary care. *BMJ*  
50  
51 2018;362:k2505.  
52  
53  
54 4. Fay MR, Martins JL, Czekay B. Oral anticoagulant prescribing patterns for stroke  
55  
56 prevention in atrial fibrillation among general practitioners and cardiologists in three  
57  
58  
59  
60

- 1  
2  
3 European countries. *European Heart Journal* 2016;37(Supplement 1 (August  
4  
5 2016):510 (P2597 Abstract).  
6  
7
- 8 5. Schuh T, Reichardt B, Finsterer J, et al. Age-dependency of prescribing patterns of oral  
9  
10 anticoagulant drugs in Austria during 2011-2014. *J Thromb Thrombolysis*  
11  
12 2016;42(3):447–51.  
13  
14
- 15 6. Bjerring Olesen JB, Sorensen R, Hansen ML, et al. Non-vitamin K antagonist oral  
16  
17 anticoagulation agents in anticoagulant naive atrial fibrillation patients: Danish  
18  
19 nationwide descriptive data 2011-2013. *Europace* 2015;17(2):187–93.  
20  
21  
22
- 23 7. Kjerpeseth LJ, Ellekjaer H, Selmer R, et al. Trends in use of warfarin and direct oral  
24  
25 anticoagulants in atrial fibrillation in Norway, 2010 to 2015. *Eur J Clin Pharmacol*  
26  
27 2017;73(11):1417–25.  
28  
29
- 30 8. Buchholz A, Ueberham L, Gorczynska K, et al. Initial apixaban dosing in patients with atrial  
31  
32 fibrillation. *Clin Cardiol* 2018;41(5):671–76.  
33  
34
- 35 9. Staerk L, Gerds TA, Lip GYH, et al. Standard and reduced doses of dabigatran, rivaroxaban  
36  
37 and apixaban for stroke prevention in atrial fibrillation: a nationwide cohort study. *J*  
38  
39 *Intern Med* 2018;283(1):45–55.  
40  
41
- 42 10. Steinberg BA, Shrader P, Pieper K, et al. Frequency and Outcomes of Reduced Dose Non-  
43  
44 Vitamin K Antagonist Anticoagulants: Results From ORBIT-AF II (The Outcomes  
45  
46 Registry for Better Informed Treatment of Atrial Fibrillation II). *J Am Heart Assoc*  
47  
48 2018;7(4) doi: e007633 [pii]10.1161/JAHA.117.007633  
49  
50  
51
- 52 11. Yao X, Shah ND, Sangaralingham LR, et al. Non-Vitamin K Antagonist Oral Anticoagulant  
53  
54 Dosing in Patients With Atrial Fibrillation and Renal Dysfunction. *J Am Coll Cardiol*  
55  
56 2017;69(23):2779–90.  
57  
58  
59  
60

- 1  
2  
3 12. Barra ME, Fanikos J, Connors JM, et al. Evaluation of Dose-Reduced Direct Oral  
4  
5 Anticoagulant Therapy. *Am J Med* 2016;129(11):1198–204.  
6  
7
- 8 13. Lavoie K, Turgeon MH, Brais C, et al. Inappropriate dosing of direct oral anticoagulants in  
9  
10 patients with atrial fibrillation. *J Atr Fibrillation* 2016;9(4):1478.  
11  
12
- 13 14. Pisters R, van Vugt SPG, Brouwer MA, et al. Real-life use of Rivaroxaban in the  
14  
15 Netherlands: data from the Xarelto for Prevention of Stroke in Patients with Atrial  
16  
17 Fibrillation (XANTUS) registry. *Neth Heart J* 2017;25(10):551–58.  
18  
19
- 20 15. Herrett E, Gallagher AM, Bhaskaran K, et al. Data Resource Profile: Clinical Practice  
21  
22 Research Datalink (CPRD). *Int J Epidemiol* 2015;44(3):827–36. doi:  
23  
24 10.1093/ije/dyv098  
25  
26
- 27 16. IQVIA. The Health Improvement Network (THIN) [Available from:  
28  
29 <https://www.iqvia.com/locations/uk-and-ireland/thin>. Accessed 23 April 2019  
30  
31
- 32 17. Blak BT, Thompson M, Dattani H, et al. Generalisability of The Health Improvement  
33  
34 Network (THIN) database: demographics, chronic disease prevalence and mortality  
35  
36 rates. *Inform Prim Care* 2011;19(4):251–5.  
37  
38
- 39 18. Herrett E, Thomas SL, Schoonen WM, et al. Validation and validity of diagnoses in the  
40  
41 General Practice Research Database: a systematic review. *Br J Clin Pharmacol*  
42  
43 2010;69(1):4–14.  
44  
45
- 46 19. Cai B, Xu W, Bortnichak E, et al. An algorithm to identify medical practices common to  
47  
48 both the General Practice Research Database and The Health Improvement Network  
49  
50 database. *Pharmacoepidemiol Drug Saf* 2012;21(7):770–74.  
51  
52
- 53 20. Plana E, McGrath LJ, Fortuny J, et al. An Algorithm to Identify Duplicate Patients When  
54  
55 Pooling Aggregate Data From Two Primary Care Databases in the United Kingdom.  
56  
57 *Pharmacoepidemiology and Drug Safety* 2016;25(S3):58–59.  
58  
59  
60

1  
2  
3 21. Levey AS, Stevens LA, Schmid CH, et al. A new equation to estimate glomerular filtration  
4  
5 rate. *Ann Intern Med* 2009;150(9):604–12.  
6

7  
8 22. Clegg A, Bates C, Young J, et al. Development and validation of an electronic frailty index  
9  
10 using routine primary care electronic health record data. *Age Ageing*  
11  
12 2016;45(3):353–60.  
13  
14  
15  
16  
17  
18  
19  
20  
21  
22  
23  
24  
25  
26  
27  
28  
29  
30  
31  
32  
33  
34  
35  
36  
37  
38  
39  
40  
41  
42  
43  
44  
45  
46  
47  
48  
49  
50  
51  
52  
53  
54  
55  
56  
57  
58  
59  
60

For peer review only

**Table 1.** Baseline characteristics of the cohort of 30,467 new users of NOACs with NVAf and no other recent indication, stratified by dose of first NOAC prescription (standard or reduced dose).

|                                        | Apixaban (N=10,834)              |                                  | Dabigatran (N=4381)              |                                 | Rivaroxaban (N=15,252)*            |                                 |
|----------------------------------------|----------------------------------|----------------------------------|----------------------------------|---------------------------------|------------------------------------|---------------------------------|
|                                        | Standard dose<br>(n=7061; 65.2%) | Reduced dose<br>(n= 3773; 34.8%) | Standard dose<br>(n=2018; 46.1%) | Reduced dose<br>(n=2363; 53.9%) | Standard dose<br>(n=12,091; 79.3%) | Reduced dose<br>(n=3081; 20.2%) |
| <b>Sex</b>                             |                                  |                                  |                                  |                                 |                                    |                                 |
| Male                                   | 4271 (60.5)                      | 1488 (39.4)                      | 1380 (68.4)                      | 1143 (48.4)                     | 7042 (58.2)                        | 1289 (41.8)                     |
| Female                                 | 2790 (39.5)                      | 2285 (60.6)                      | 638 (31.6)                       | 1220 (51.6)                     | 5049 (41.8)                        | 1792 (58.2)                     |
| <b>Age (years)</b>                     |                                  |                                  |                                  |                                 |                                    |                                 |
| <60                                    | 833 (11.8)                       | 63 (1.7)                         | 380 (18.8)                       | 73 (3.1)                        | 1233 (10.2)                        | 66 (2.1)                        |
| 60–69                                  | 1903 (27.0)                      | 177 (4.7)                        | 726 (36.0)                       | 202 (8.5)                       | 2696 (22.3)                        | 199 (6.5)                       |
| 70–79                                  | 2860 (40.5)                      | 676 (17.9)                       | 842 (41.7)                       | 699 (29.6)                      | 4400 (36.4)                        | 715 (23.2)                      |
| ≥80                                    | 1465 (20.7)                      | 2857 (75.7)                      | 70 (3.5)                         | 1389 (58.8)                     | 3762 (31.1)                        | 2101 (68.2)                     |
| Mean age (SD)                          | 71.4 (10.2)                      | 82.8 (7.8)                       | 67.2 (9.1)                       | 79.7 (8.5)                      | 73.6 (10.6)                        | 81.8 (8.5)                      |
| <b>OAC naïve status</b>                |                                  |                                  |                                  |                                 |                                    |                                 |
| Naïve                                  | 3915 (55.4)                      | 1859 (49.3)                      | 909 (45.0)                       | 918 (38.8)                      | 5881 (48.6)                        | 1295 (42.0)                     |
| Non-naïve                              | 3146 (44.6)                      | 1914 (50.7)                      | 1109 (55.0)                      | 1445 (61.2)                     | 6210 (51.4)                        | 1786 (58.0)                     |
| <b>Year of first NOAC prescription</b> |                                  |                                  |                                  |                                 |                                    |                                 |
| 2011–13                                | 184 (2.6)                        | 107 (2.8)                        | 968 (48.0)                       | 1206 (51.0)                     | 1492 (12.3)                        | 479 (15.5)                      |
| 2014–16                                | 6877 (97.4)                      | 3666 (97.2)                      | 1050 (52.0)                      | 1157 (49.0)                     | 10,599 (87.7)                      | 2602 (84.5)                     |
| <b>BMI</b>                             |                                  |                                  |                                  |                                 |                                    |                                 |
| 10–19 (underweight)                    | 117 (1.7)                        | 331 (8.8)                        | 35 (1.7)                         | 139 (5.9)                       | 434 (3.6)                          | 212 (6.9)                       |
| 20–24 (healthy weight)                 | 1322 (18.7)                      | 1201 (31.8)                      | 343 (17.0)                       | 665 (28.1)                      | 2679 (22.2)                        | 875 (28.4)                      |
| 25–29 (overweight)                     | 2599 (36.8)                      | 1228 (32.5)                      | 735 (36.4)                       | 866 (36.6)                      | 4230 (35.0)                        | 1035 (33.6)                     |
| ≥30 (obese)                            | 2766 (39.2)                      | 836 (22.2)                       | 809 (40.1)                       | 593 (25.1)                      | 4291 (35.5)                        | 847 (27.5)                      |
| Unknown                                | 257 (3.6)                        | 177 (4.7)                        | 96 (4.8)                         | 100 (4.2)                       | 457 (3.8)                          | 112 (3.6)                       |
| <b>Smoking</b>                         |                                  |                                  |                                  |                                 |                                    |                                 |
| Non-smoker                             | 2851 (40.4)                      | 1683 (44.6)                      | 784 (38.9)                       | 1015 (43.0)                     | 4876 (40.3)                        | 1282 (41.6)                     |
| Smoker                                 | 605 (8.6)                        | 221 (5.9)                        | 178 (8.8)                        | 126 (5.3)                       | 1015 (8.4)                         | 182 (5.9)                       |
| Ex-smoker                              | 3598 (51.0)                      | 1865 (49.4)                      | 1052 (52.1)                      | 1221 (51.7)                     | 6190 (51.2)                        | 1617 (52.5)                     |
| Unknown                                | 7 (0.1)                          | 4 (0.1)                          | 4 (0.2)                          | 1 (0.0)                         | 10 (0.1)                           | 0 (0.0)                         |

|                                                   | Apixaban (N=10,834)              |                                  | Dabigatran (N=4381)              |                                 | Rivaroxaban (N=15,252)*            |                                 |
|---------------------------------------------------|----------------------------------|----------------------------------|----------------------------------|---------------------------------|------------------------------------|---------------------------------|
|                                                   | Standard dose<br>(n=7061; 65.2%) | Reduced dose<br>(n= 3773; 34.8%) | Standard dose<br>(n=2018; 46.1%) | Reduced dose<br>(n=2363; 53.9%) | Standard dose<br>(n=12,091; 79.3%) | Reduced dose<br>(n=3081; 20.2%) |
| <b>Alcohol (units/week)</b>                       |                                  |                                  |                                  |                                 |                                    |                                 |
| None                                              | 1356 (19.2)                      | 1129 (29.9)                      | 244 (12.1)                       | 526 (22.3)                      | 2244 (18.6)                        | 827 (26.8)                      |
| 1–9                                               | 3044 (43.1)                      | 1663 (44.1)                      | 857 (42.5)                       | 1128 (47.7)                     | 5501 (45.5)                        | 1448 (47.0)                     |
| 10–20                                             | 1316 (18.6)                      | 390 (10.3)                       | 422 (20.9)                       | 315 (13.3)                      | 1975 (16.3)                        | 316 (10.3)                      |
| 21–41                                             | 470 (6.7)                        | 128 (3.4)                        | 219 (10.9)                       | 99 (4.2)                        | 821 (6.8)                          | 95 (3.1)                        |
| ○ ☒                                               | 227 (3.2)                        | 48 (1.3)                         | 92 (4.6)                         | 45 (1.9)                        | 354 (2.9)                          | 50 (1.6)                        |
| Unknown                                           | 648 (9.2)                        | 415 (11.0)                       | 184 (9.1)                        | 250 (10.6)                      | 1196 (9.9)                         | 345 (11.2)                      |
| <b>History of CVD</b>                             |                                  |                                  |                                  |                                 |                                    |                                 |
| IHD                                               | 1939 (27.5)                      | 1309 (34.7)                      | 416 (20.6)                       | 735 (31.1)                      | 3014 (24.9)                        | 1098 (35.6)                     |
| Heart failure                                     | 1080 (15.3)                      | 847 (22.4)                       | 268 (13.3)                       | 469 (19.8)                      | 1709 (14.1)                        | 791 (25.7)                      |
| Hypertension                                      | 4464 (63.2)                      | 2762 (73.2)                      | 1192 (59.1)                      | 1691 (71.6)                     | 7888 (65.2)                        | 2338 (75.9)                     |
| Ischaemic stroke                                  | 990 (14.0)                       | 774 (20.5)                       | 254 (12.6)                       | 435 (18.4)                      | 1567 (13.0)                        | 553 (17.9)                      |
| <b>History of bleeding disorders</b>              |                                  |                                  |                                  |                                 |                                    |                                 |
| Intracranial bleeding                             | 96 (1.4)                         | 108 (2.9)                        | 20 (1.0)                         | 51 (2.2)                        | 139 (1.1)                          | 52 (1.7)                        |
| GI bleeding                                       | 957 (13.6)                       | 573 (15.2)                       | 232 (11.5)                       | 349 (14.8)                      | 1609 (13.3)                        | 440 (14.3)                      |
| Urogenital bleeding                               | 877 (12.4)                       | 517 (13.7)                       | 214 (10.6)                       | 309 (13.1)                      | 1629 (13.5)                        | 449 (14.6)                      |
| <b>eGFR (CKD-EPI)<br/>/min/1.73 m<sup>2</sup></b> |                                  |                                  |                                  |                                 |                                    |                                 |
| >50                                               | 5323 (75.4)                      | 1968 (52.2)                      | 1625 (80.5)                      | 1634 (69.1)                     | 9547 (79.0)                        | 1105 (35.9)                     |
| 30–50                                             | 694 (9.8)                        | 1125 (29.8)                      | 110 (5.5)                        | 464 (19.6)                      | 892 (7.4)                          | 1475 (47.9)                     |
| <30                                               | 25 (0.4)                         | 255 (6.8)                        | 4 (0.2)                          | 16 (0.7)                        | 46 (0.4)                           | 223 (7.2)                       |
| Unknown                                           | 1019 (14.4)                      | 425 (11.3)                       | 279 (13.8)                       | 249 (10.5)                      | 1606 (13.3)                        | 278 (9.0)                       |
| <b>Frailty index</b>                              |                                  |                                  |                                  |                                 |                                    |                                 |
| Fit                                               | 1306 (18.5)                      | 191 (5.1)                        | 517 (25.6)                       | 201 (8.5)                       | 2120 (17.5)                        | 133 (4.3)                       |
| Mild frailty                                      | 2839 (40.2)                      | 933 (24.7)                       | 918 (45.5)                       | 706 (29.9)                      | 4624 (38.2)                        | 668 (21.7)                      |
| Moderate frailty                                  | 1978 (28.0)                      | 1395 (37.0)                      | 448 (22.2)                       | 833 (35.3)                      | 3522 (29.1)                        | 1182 (38.4)                     |
| Severe frailty                                    | 938 (13.3)                       | 1254 (33.2)                      | 135 (6.7)                        | 623 (26.4)                      | 1825 (15.1)                        | 1098 (35.6)                     |



|                                                | Apixaban (N=10,834)              |                                  | Dabigatran (N=4381)              |                                 | Rivaroxaban (N=15,252)*            |                                 |
|------------------------------------------------|----------------------------------|----------------------------------|----------------------------------|---------------------------------|------------------------------------|---------------------------------|
|                                                | Standard dose<br>(n=7061; 65.2%) | Reduced dose<br>(n= 3773; 34.8%) | Standard dose<br>(n=2018; 46.1%) | Reduced dose<br>(n=2363; 53.9%) | Standard dose<br>(n=12,091; 79.3%) | Reduced dose<br>(n=3081; 20.2%) |
| <b>CHA<sub>2</sub>DS<sub>2</sub>VASc score</b> |                                  |                                  |                                  |                                 |                                    |                                 |
| 0                                              | 42 (6.0)                         | 25 (0.7)                         | 220 (10.9)                       | 32 (1.4)                        | 608 (5.0)                          | 23 (0.7)                        |
| 1                                              | 675 (9.6)                        | 52 (1.4)                         | 260 (12.9)                       | 76 (3.2)                        | 1107 (9.2)                         | 68 (2.2)                        |
| 2                                              | 1425 (20.2)                      | 252 (6.7)                        | 517 (25.6)                       | 222 (9.4)                       | 2182 (18.0)                        | 199 (6.5)                       |
| 3                                              | 1564 (22.1)                      | 623 (16.5)                       | 418 (20.7)                       | 475 (20.1)                      | 2681 (22.2)                        | 507 (16.5)                      |
| ○ ☒                                            | 2971 (42.1)                      | 2821 (74.8)                      | 603 (29.9)                       | 1558 (65.9)                     | 5513 (45.6)                        | 2284 (74.1)                     |
| Mean (SD)                                      | 3.2 (1.8)                        | 4.6 (1.6)                        | 2.7 (1.7)                        | 4.2 (1.7)                       | 3.4 (1.8)                          | 4.6 (1.6)                       |
| <b>CHADS score</b>                             |                                  |                                  |                                  |                                 |                                    |                                 |
| 0                                              | 1127 (16.0)                      | 103 (2.7)                        | 480 (23.8)                       | 114 (4.8)                       | 1696 (14.0)                        | 103 (3.3)                       |
| 1                                              | 2119 (30.0)                      | 595 (15.8)                       | 681 (33.7)                       | 448 (19.0)                      | 3440 (28.5)                        | 452 (14.7)                      |
| 2                                              | 1929 (27.3)                      | 1259 (33.4)                      | 468 (23.2)                       | 786 (33.3)                      | 3596 (29.7)                        | 1044 (33.9)                     |
| ○                                              | 1886 (26.7)                      | 1816 (48.1)                      | 389 (19.3)                       | 1015 (43.0)                     | 3359 (27.8)                        | 1482 (48.1)                     |
| Mean (SD)                                      | 1.8 (1.3)                        | 2.6 (1.3)                        | 1.5 (1.2)                        | 1.9 (1.3)                       | 1.9 (1.3)                          | 2.6 (1.3)                       |
| <b>HAS-BLED score</b>                          |                                  |                                  |                                  |                                 |                                    |                                 |
| 0                                              | 814 (11.5)                       | 46 (1.2)                         | 312 (15.5)                       | 49 (2.1)                        | 1224 (10.1)                        | 54 (1.8)                        |
| 1                                              | 2437 (34.5)                      | 1163 (30.8)                      | 704 (34.9)                       | 721 (30.5)                      | 4460 (36.9)                        | 938 (30.4)                      |
| 2                                              | 2510 (35.5)                      | 1514 (40.1)                      | 699 (34.6)                       | 1005 (42.5)                     | 4467 (36.9)                        | 1305 (42.4)                     |
| 3                                              | 1089 (15.4)                      | 789 (20.9)                       | 263 (13.0)                       | 470 (19.9)                      | 1612 (13.3)                        | 596 (19.3)                      |
| ○ ☒                                            | 211 (3.0)                        | 261 (6.9)                        | 40 (2.0)                         | 118 (5.0)                       | 328 (2.7)                          | 188 (6.1)                       |
| Mean (SD)                                      | 1.6 (1.0)                        | 2.0 (1.0)                        | 1.6 (0.9)                        | 2.0 (0.9)                       | 1.6 (0.9)                          | 2.0 (0.9)                       |
| <b>Medications<sup>†</sup></b>                 |                                  |                                  |                                  |                                 |                                    |                                 |
| Antiplatelets                                  | 3250 (46.0)                      | 1844 (48.9)                      | 993 (49.2)                       | 1285 (54.4)                     | 5299 (43.8)                        | 1519 (49.3)                     |
| Antiarrhythmics                                | 1074 (15.2)                      | 467 (12.4)                       | 403 (20.0)                       | 425 (18.0)                      | 1764 (14.6)                        | 403 (13.1)                      |
| Antihypertensives                              | 6114 (86.6)                      | 3400 (90.1)                      | 1743 (86.4)                      | 2147(90.9)                      | 10,591 (87.6)                      | 2860 (92.8)                     |

\*80 patients starting therapy on rivaroxaban were prescribed an initial daily dose higher than standard daily dose (>20 mg day) and are not included in the table. †Prescription in the year before the first NOAC prescription.

BMI, body mass index; CVD, cardiovascular disease; CKD-EPI, Chronic Kidney Disease Epidemiology; eGFR, estimated glomerular filtration; GI, gastrointestinal; IHD, ischaemic heart disease; NOACs, non-vitamin K antagonist oral anticoagulant; NVAf, non-valvular atrial fibrillation; SD, standard deviation.

**Table 2.** Prescribing of recommended daily dose of index NOAC (first NOAC prescription) by eligibility according to the EU label.

| Daily dose of index NOAC prescribed    | Dosing eligibility |               |                  |                             |
|----------------------------------------|--------------------|---------------|------------------|-----------------------------|
|                                        | Standard dose      | Reduced dose  | Contra-indicated | Total (overall eligibility) |
| <b>APIXABAN</b>                        | <b>N=9194</b>      | <b>N=1385</b> | <b>N=255</b>     | <b>N=10,834</b>             |
| Recommended                            | 6850 (74.5)        | 1260 (91.0)   | NA               | 8110 (74.9)                 |
| Lower than recommended                 | 2344 (25.5)        | 0 (0)         | NA               | 2344 (21.6)                 |
| Higher than recommended                | 0 (0)              | 125 (9.0)     | NA               | 125 (1.1)                   |
| Prescribed a NOAC when contraindicated | NA                 | NA            | 255 (100)        | 255 (2.4)                   |
| <b>DABIGATRAN</b>                      | <b>N=1790</b>      | <b>N=2357</b> | <b>N=234</b>     | <b>N=4381</b>               |
| Recommended                            | 1409 (78.7)        | 1849 (78.4)   | NA               | 3258 (74.4)                 |
| Lower than recommended                 | 381 (21.3)         | 0 (0)         | NA               | 381 (8.7)                   |
| Higher than recommended                | 0 (0)              | 508 (21.6)    | NA               | 508 (11.6)                  |
| Prescribed a NOAC when contraindicated | NA                 | NA            | 234 (100)        | 234 (5.3)                   |
| <b>RIVAROXABAN</b>                     | <b>N=12,607</b>    | <b>N=2638</b> | <b>N=7</b>       | <b>N=15,252</b>             |
| Recommended                            | 11,162 (88.5)      | 1687 (63.9)   | NA               | 12,849 (84.2)               |
| Lower than recommended                 | 1389 (11.0)        | 0 (0)         | NA               | 1389 (9.1)                  |
| Higher than recommended                | 56 (0.40)          | 951 (36.1)    | NA               | 1007 (6.6)                  |
| Prescribed a NOAC when contraindicated | NA                 | NA            | 7 (100)          | 7 (0.05)                    |

Data are n (column %).

EU, European Union; NOAC, non-vitamin K antagonist oral anticoagulants

1  
2  
3 **FIGURE LEGENDS**  
4  
5

6 **Figure 1.** Overall dose appropriateness of index NOAC daily dose (first prescribed NOAC).  
7

8  
9 NOAC, non-vitamin K antagonist oral anticoagulant.  
10

11  
12  
13 **Figure 2.** Daily dose at index prescription by degree of renal impairment\* for (A) new users of  
14 apixaban, (B) new users of dabigatran and (C) new users of rivaroxaban, in patients with NVAF  
15 and no other recent indication. *Note:* Renal function was unknown in 13.6% of the apixaban  
16 cohort, 12.3% of the dabigatran cohort and 13.0% of the rivaroxaban cohort.  
17  
18  
19  
20

21 \*Estimated using the Chronic Kidney Disease Epidemiology Collaboration equation.  
22

23  
24 eGFR, estimated glomerular filtration rate; NVAF, non-valvular atrial fibrillation  
25  
26  
27  
28  
29  
30  
31  
32  
33  
34  
35  
36  
37  
38  
39  
40  
41  
42  
43  
44  
45  
46  
47  
48  
49  
50  
51  
52  
53  
54  
55  
56  
57  
58  
59  
60

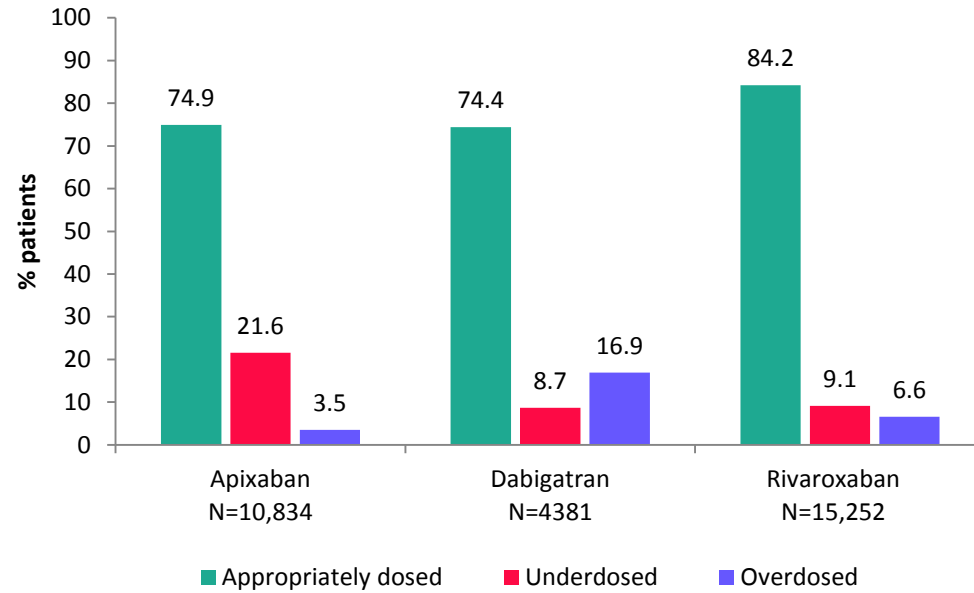

**Figure 1.** Overall dose appropriateness of index NOAC daily dose (first prescribed NOAC).

NOAC, non-vitamin K antagonist oral anticoagulant.

A. Apixaban

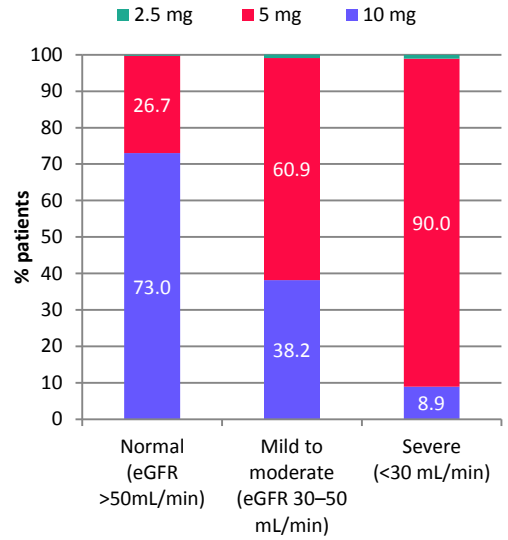

B. Dabigatran

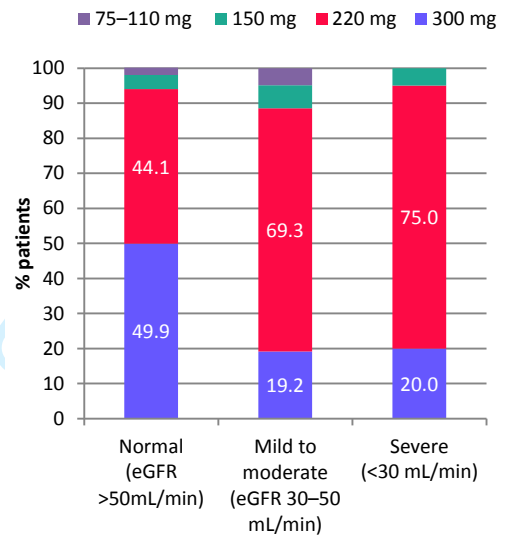

C. Rivaroxaban

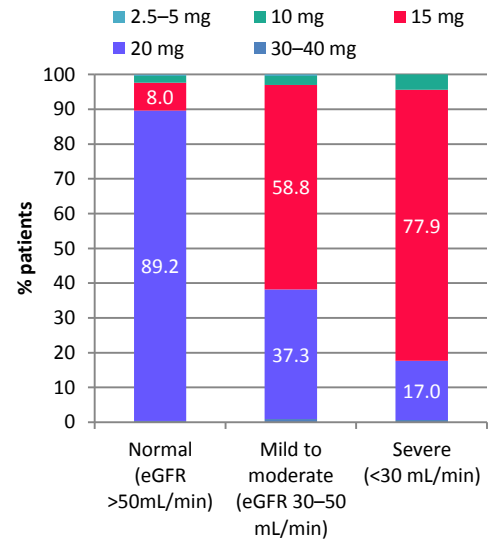

view only

1  
2  
3  
4  
5  
6  
7  
8  
9  
10  
11  
12  
13  
14  
15  
16  
17  
18  
19  
20  
21  
22  
23  
24  
25  
26  
27  
28  
29  
30  
31  
32  
33  
34  
35  
36  
37  
38  
39  
40  
41  
42  
43  
44  
45  
46  
47

**Supplementary Table 1.** Recommended dosing criteria and contraindications for each NOAC (for the prevention of stroke and systemic embolism in patients with NVAF) that were applied in the study.

| NOAC                                                                                      | Reduced dosing criteria                                                                                                                                                                                                                                                                                                                                                                                        | Contraindications                                                                                                                                                                                                  |
|-------------------------------------------------------------------------------------------|----------------------------------------------------------------------------------------------------------------------------------------------------------------------------------------------------------------------------------------------------------------------------------------------------------------------------------------------------------------------------------------------------------------|--------------------------------------------------------------------------------------------------------------------------------------------------------------------------------------------------------------------|
| <b>Apixaban<sup>a</sup></b><br><b>standard or normal recommended daily dose = 10 mg</b>   | 2.5 mg taken orally twice daily in patients with NVAF and $\geq 2$ of the following: <ul style="list-style-type: none"> <li>• age <math>\geq 80</math> years</li> <li>• body weight <math>\leq 60</math> kg</li> <li>• serum creatinine <math>\geq 1.5</math> mg/dL (133 micromole/L).</li> </ul> Or, severe renal impairment (CrCL 15–29 mL/min)                                                              | <i>Note:</i> In patients with CrCL $< 15$ ml/min or undergoing dialysis, there is no clinical experience therefore apixaban is not recommended.                                                                    |
| <b>Dabigatran<sup>b</sup></b><br><b>standard or normal recommended daily dose = 300mg</b> | <ul style="list-style-type: none"> <li>• age <math>\geq 80</math> years</li> <li>• concomitant use of verapamil</li> </ul> Reduction for consideration when <sup>d</sup> : <ul style="list-style-type: none"> <li>• patients between 75–80 years</li> <li>• patients with moderate renal impairment (CrCL 30–50 mL/min)</li> <li>• patients with gastritis oesophagitis or gastrooesophagal reflux.</li> </ul> | <ul style="list-style-type: none"> <li>• Severe renal impairment (CrCL <math>&lt; 30</math>ml/min)</li> </ul> <i>Note:</i> Dabigatran is also not recommended in patients with hepatic impairment or liver disease |
| <b>Rivaroxaban<sup>c</sup></b><br><b>standard or normal recommended daily dose = 20mg</b> | In patients with moderate/severe renal impairment (CrCL 15–49 ml/min)                                                                                                                                                                                                                                                                                                                                          | <ul style="list-style-type: none"> <li>• Severe renal impairment (creatinine clearance <math>&lt; 15</math> ml/min)</li> </ul>                                                                                     |

**Sources from which our modified criteria were obtained.**

<sup>a</sup>Eliquis. Summary of Product Characteristics.

[http://www.ema.europa.eu/docs/en\\_GB/document\\_library/EPAR\\_-\\_Product\\_Information/human/002148/WC500107728.pdf](http://www.ema.europa.eu/docs/en_GB/document_library/EPAR_-_Product_Information/human/002148/WC500107728.pdf). Accessed 7 September 2018.

<sup>b</sup>Pradaxa. Summary of Product Characteristics.

[http://www.ema.europa.eu/docs/en\\_GB/document\\_library/EPAR\\_-\\_Product\\_Information/human/000829/WC500041059.pdf](http://www.ema.europa.eu/docs/en_GB/document_library/EPAR_-_Product_Information/human/000829/WC500041059.pdf)

<sup>c</sup>Xarelto. Pradaxa. Summary of Product Characteristics.

[http://www.ema.europa.eu/docs/en\\_GB/document\\_library/EPAR\\_-\\_Product\\_Information/human/000944/WC500057108.pdf](http://www.ema.europa.eu/docs/en_GB/document_library/EPAR_-_Product_Information/human/000944/WC500057108.pdf)

<sup>d</sup>Patients meeting at least one of these criteria were considered eligible for dose reduction in our study.

CrCL, creatinine clearance; NVAF, non-valvular atrial fibrillation

**Supplementary Table 2.** Frequency distribution of the daily dose of index NOAC prescription.

| Daily dose of index NOAC prescription             | No. of patients | % of patients |
|---------------------------------------------------|-----------------|---------------|
| <b>Apixaban</b>                                   | <b>10,834</b>   |               |
| 2.5 mg                                            | 53              | 0.5           |
| 5 mg                                              | 3720            | 34.3          |
| 10 mg (standard)                                  | 7061            | 65.2          |
| <b>Dabigatran</b>                                 | <b>4381</b>     |               |
| 75–110 mg                                         | 101             | 2.3           |
| 150 mg                                            | 196             | 4.5           |
| 220 mg                                            | 2066            | 47.2          |
| 300 mg (standard)                                 | 2018            | 46.1          |
| <b>Rivaroxaban</b>                                | <b>15,252</b>   |               |
| 2.5–5 mg                                          | 50              | 0.3           |
| 10 mg                                             | 340             | 2.2           |
| 15 mg                                             | 2691            | 17.6          |
| 20 mg (standard)                                  | 12,091          | 79.3          |
| 30–40 mg                                          | 80              | 0.5           |
| NOAC, non-vitamin K antagonist oral anticoagulant |                 |               |

**Supplementary Table 3.** Daily dose of NOAC 6 months after the index date among patients with at least 6 months follow-up and still using a NOAC at 6 months.

|                             | Daily dose 6 months after the index date    |     |                                            |      |                                              |     |
|-----------------------------|---------------------------------------------|-----|--------------------------------------------|------|----------------------------------------------|-----|
|                             | Lower dose than the index NOAC prescription |     | Same dose than the index NOAC prescription |      | Higher dose than the index NOAC prescription |     |
|                             | n                                           | %   | n                                          | %    | n                                            | %   |
| <b>Apixaban (N=6783)</b>    | 119                                         | 1.8 | 6471                                       | 95.4 | 193                                          | 2.8 |
| <b>Dabigatran (2874)</b>    | 74                                          | 2.6 | 2692                                       | 93.7 | 108                                          | 3.8 |
| <b>Rivaroxaban (10,068)</b> | 377                                         | 3.7 | 9511                                       | 94.5 | 180                                          | 1.8 |

NOAC, non-vitamin K antagonist oral anticoagulant



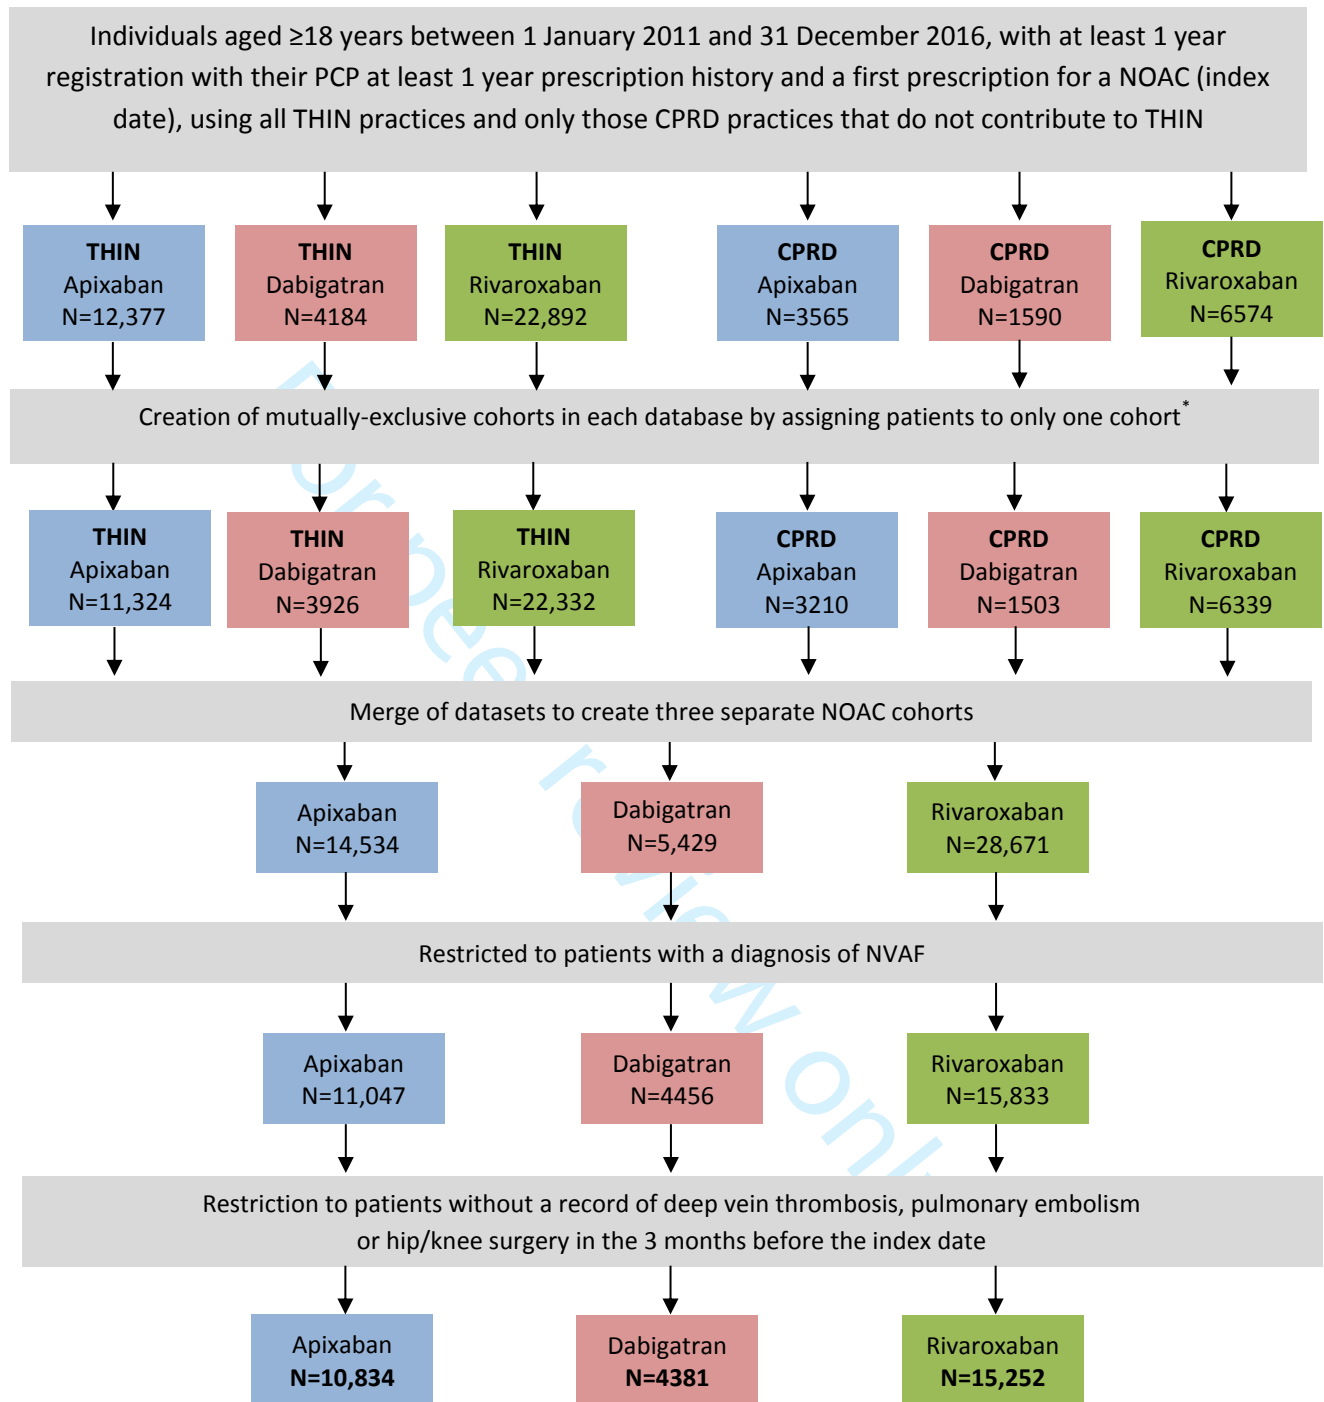

**Supplementary Figure 1.** Flowchart depicting identification of the three NOAC study cohorts from THIN and the CPRD. \*Mutually exclusive cohorts were created by excluding patients who were prescribed two different NOACs on the same day and by assigning patients to the cohort of the first prescribed NOAC.

CPRD, Clinical Practice Research Datalink; NOAC, non-vitamin K antagonist oral anticoagulant; NVAF, non-valvular atrial fibrillation; PCP, primary care practitioner; THIN, The Health Improvement Network.

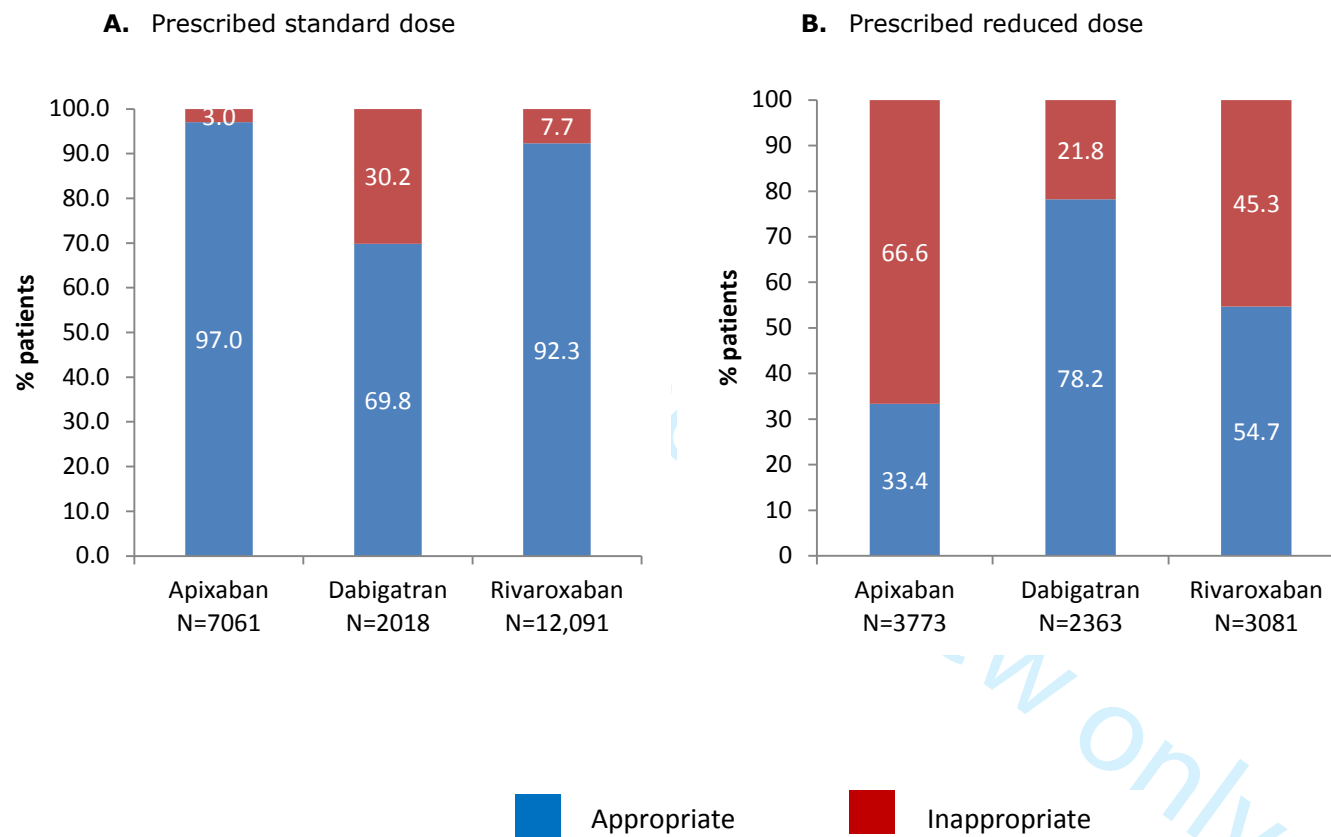

**Supplementary Figure 2:** Appropriateness of daily dose of index NOAC among patients with non-valvular atrial fibrillation who were prescribed (A) a standard dose and (B) a reduced dose.  
 NOAC, non-vitamin K antagonist oral anticoagulant

**STROBE Statement—Checklist of items that should be included in reports of cross-sectional studies**

|                              | <b>Item No</b> | <b>Recommendation</b>                                                                                                                                                                             | <b>Page No</b>                         |
|------------------------------|----------------|---------------------------------------------------------------------------------------------------------------------------------------------------------------------------------------------------|----------------------------------------|
| <b>Title and abstract</b>    | 1              | (a) Indicate the study's design with a commonly used term in the title or the abstract                                                                                                            | 1 and 2                                |
|                              |                | (b) Provide in the abstract an informative and balanced summary of what was done and what was found                                                                                               | 2 and 3                                |
| <b>Introduction</b>          |                |                                                                                                                                                                                                   |                                        |
| Background/rationale         | 2              | Explain the scientific background and rationale for the investigation being reported                                                                                                              | 5                                      |
| Objectives                   | 3              | State specific objectives, including any prespecified hypotheses                                                                                                                                  | 5                                      |
| <b>Methods</b>               |                |                                                                                                                                                                                                   |                                        |
| Study design                 | 4              | Present key elements of study design early in the paper                                                                                                                                           | 5 and 6                                |
| Setting                      | 5              | Describe the setting, locations, and relevant dates, including periods of recruitment, exposure, follow-up, and data collection                                                                   | 6 to 8                                 |
| Participants                 | 6              | (a) Give the eligibility criteria, and the sources and methods of selection of participants                                                                                                       | 6 to 8                                 |
| Variables                    | 7              | Clearly define all outcomes, exposures, predictors, potential confounders, and effect modifiers. Give diagnostic criteria, if applicable                                                          | 8 to 9                                 |
| Data sources/<br>measurement | 8*             | For each variable of interest, give sources of data and details of methods of assessment (measurement). Describe comparability of assessment methods if there is more than one group              | 7 to 8                                 |
| Bias                         | 9              | Describe any efforts to address potential sources of bias                                                                                                                                         | 6                                      |
| Study size                   | 10             | Explain how the study size was arrived at                                                                                                                                                         | 6                                      |
| Quantitative<br>variables    | 11             | Explain how quantitative variables were handled in the analyses. If applicable, describe which groupings were chosen and why                                                                      | 9                                      |
| Statistical methods          | 12             | (a) Describe all statistical methods, including those used to control for confounding                                                                                                             | 9                                      |
|                              |                | (b) Describe any methods used to examine subgroups and interactions                                                                                                                               |                                        |
|                              |                | (c) Explain how missing data were addressed                                                                                                                                                       |                                        |
|                              |                | (d) If applicable, describe analytical methods taking account of sampling strategy                                                                                                                |                                        |
|                              |                | (e) Describe any sensitivity analyses                                                                                                                                                             |                                        |
| <b>Results</b>               |                |                                                                                                                                                                                                   |                                        |
| Participants                 | 13*            | (a) Report numbers of individuals at each stage of study—eg numbers potentially eligible, examined for eligibility, confirmed eligible, included in the study, completing follow-up, and analysed | 9 and Suppl Fig 1                      |
|                              |                | (b) Give reasons for non-participation at each stage                                                                                                                                              |                                        |
|                              |                | (c) Consider use of a flow diagram                                                                                                                                                                | Suppl Fig 1                            |
| Descriptive data             | 14*            | (a) Give characteristics of study participants (eg demographic, clinical, social) and information on exposures and potential confounders                                                          | 10 and Table 1                         |
|                              |                | (b) Indicate number of participants with missing data for each variable of interest                                                                                                               | Table 1                                |
| Outcome data                 | 15*            | Report numbers of outcome events or summary measures                                                                                                                                              | 10 to 13, Fig 1, Fig 2 and Suppl Fig 2 |

|    |                          |    |                                                                                                                                                                                                              |
|----|--------------------------|----|--------------------------------------------------------------------------------------------------------------------------------------------------------------------------------------------------------------|
| 1  |                          |    |                                                                                                                                                                                                              |
| 2  | Main results             | 16 | (a) Give unadjusted estimates and, if applicable, confounder-adjusted estimates and their precision (eg, 95% confidence interval). Make clear which confounders were adjusted for and why they were included |
| 3  |                          |    |                                                                                                                                                                                                              |
| 4  |                          |    |                                                                                                                                                                                                              |
| 5  |                          |    |                                                                                                                                                                                                              |
| 6  |                          |    | (b) Report category boundaries when continuous variables were categorized                                                                                                                                    |
| 7  |                          |    |                                                                                                                                                                                                              |
| 8  |                          |    | (c) If relevant, consider translating estimates of relative risk into absolute risk for a meaningful time period                                                                                             |
| 9  |                          |    |                                                                                                                                                                                                              |
| 10 |                          |    |                                                                                                                                                                                                              |
| 11 | Other analyses           | 17 | Report other analyses done—eg analyses of subgroups and interactions, and sensitivity analyses                                                                                                               |
| 12 |                          |    |                                                                                                                                                                                                              |
| 13 |                          |    |                                                                                                                                                                                                              |
| 14 | <b>Discussion</b>        |    |                                                                                                                                                                                                              |
| 15 | Key results              | 18 | Summarise key results with reference to study objectives                                                                                                                                                     |
| 16 | Limitations              | 19 | Discuss limitations of the study, taking into account sources of potential bias or imprecision. Discuss both direction and magnitude of any potential bias                                                   |
| 17 |                          |    |                                                                                                                                                                                                              |
| 18 |                          |    |                                                                                                                                                                                                              |
| 19 |                          |    |                                                                                                                                                                                                              |
| 20 | Interpretation           | 20 | Give a cautious overall interpretation of results considering objectives, limitations, multiplicity of analyses, results from similar studies, and other relevant evidence                                   |
| 21 |                          |    |                                                                                                                                                                                                              |
| 22 |                          |    |                                                                                                                                                                                                              |
| 23 |                          |    |                                                                                                                                                                                                              |
| 24 | Generalisability         | 21 | Discuss the generalisability (external validity) of the study results                                                                                                                                        |
| 25 |                          |    |                                                                                                                                                                                                              |
| 26 | <b>Other information</b> |    |                                                                                                                                                                                                              |
| 27 | Funding                  | 22 | Give the source of funding and the role of the funders for the present study and, if applicable, for the original study on which the present article is based                                                |
| 28 |                          |    |                                                                                                                                                                                                              |
| 29 |                          |    |                                                                                                                                                                                                              |
| 30 |                          |    |                                                                                                                                                                                                              |

\*Give information separately for exposed and unexposed groups.

**Note:** An Explanation and Elaboration article discusses each checklist item and gives methodological background and published examples of transparent reporting. The STROBE checklist is best used in conjunction with this article (freely available on the Web sites of PLoS Medicine at <http://www.plosmedicine.org/>, Annals of Internal Medicine at <http://www.annals.org/>, and Epidemiology at <http://www.epidem.com/>). Information on the STROBE Initiative is available at [www.strobe-statement.org](http://www.strobe-statement.org).

# BMJ Open

## Appropriateness of initial dose of Non-Vitamin K Antagonist Oral Anticoagulants in Patients with Non-Valvular Atrial Fibrillation in the United Kingdom: a Population-Based Observational Study using Primary Care Electronic Health Records

|                                 |                                                                                                                                                                                                                                                                                                                                                                                                                                                                       |
|---------------------------------|-----------------------------------------------------------------------------------------------------------------------------------------------------------------------------------------------------------------------------------------------------------------------------------------------------------------------------------------------------------------------------------------------------------------------------------------------------------------------|
| Journal:                        | <i>BMJ Open</i>                                                                                                                                                                                                                                                                                                                                                                                                                                                       |
| Manuscript ID                   | bmjopen-2019-031341.R1                                                                                                                                                                                                                                                                                                                                                                                                                                                |
| Article Type:                   | Original research                                                                                                                                                                                                                                                                                                                                                                                                                                                     |
| Date Submitted by the Author:   | 09-Aug-2019                                                                                                                                                                                                                                                                                                                                                                                                                                                           |
| Complete List of Authors:       | García Rodríguez, Luis; Spanish Centre for Pharmacoepidemiologic Research (CEIFE),<br>Martín-Pérez, Mar; Spanish Centre for Pharmacoepidemiologic research (CEIFE)<br>Vora, Pareen; Bayer AG<br>Roberts, Luke; Bayer plc<br>Balabanova, Yanina; Bayer AG<br>Brobert, Gunnar; Bayer AB<br>Fatoba, Samuel; Bayer plc<br>Suzart-Woischnik, Kiliana; Bayer AG<br>Schaefer, Bernhard; Bayer AG<br>Ruigomez, Ana; Spanish Centre for Pharmacoepidemiologic Research (CEIFE) |
| <b>Primary Subject Heading</b>: | Epidemiology                                                                                                                                                                                                                                                                                                                                                                                                                                                          |
| Secondary Subject Heading:      | Cardiovascular medicine, General practice / Family practice                                                                                                                                                                                                                                                                                                                                                                                                           |
| Keywords:                       | Thromboembolism < CARDIOLOGY, Cardiac Epidemiology < CARDIOLOGY, EPIDEMIOLOGY                                                                                                                                                                                                                                                                                                                                                                                         |
|                                 |                                                                                                                                                                                                                                                                                                                                                                                                                                                                       |

SCHOLARONE™  
Manuscripts

1  
2  
3 **Appropriateness of initial dose of Non-Vitamin K Antagonist Oral Anticoagulants in**

4  
5  
6 **Patients with Non-Valvular Atrial Fibrillation in the United Kingdom:**

7  
8 **a Population-Based Observational Study using Primary Care Electronic Health Records**

9  
10 Luis A García Rodríguez,<sup>1</sup> Mar Martín-Pérez,<sup>1</sup> Pareen Vora,<sup>2</sup> Luke Roberts,<sup>3</sup> Yanina

11  
12 Balabanova,<sup>2</sup> Gunnar Brobert,<sup>4</sup> Samuel Fatoba,<sup>3</sup> Kiliansa Suzart-Woischnik,<sup>2</sup> Bernhard

13  
14 Schaefer,<sup>2</sup> Ana Ruigómez<sup>1</sup>

15  
16  
17  
18  
19  
20 **Short title:** Appropriate dosing of NOACs in the UK

21  
22  
23  
24  
25 <sup>1</sup>Spanish Centre for Pharmacoepidemiologic Research (CEIFE), Madrid, Spain

26  
27 <sup>2</sup>Bayer AG, Berlin, Germany

28  
29 <sup>3</sup>Bayer PLC, Reading UK

30  
31 <sup>4</sup>Bayer AB, Stockholm, Sweden

32  
33  
34  
35  
36  
37 **Corresponding author:** Luis A García Rodríguez, Spanish Centre for Pharmacoepidemiologic

38  
39 Research (CEIFE), Almirante 28; 28004 Madrid, Spain, Tel: +34-91-531 3404, Fax: +34-91-531

40  
41  
42 2871, email: lagarcia@ceife.es

43  
44  
45 **Word count:** 3653

## ABSTRACT

**Objective:** To evaluate the appropriateness of the initial prescribed daily dose of non-vitamin K antagonist oral anticoagulants (NOACs) according to label in patients with non-valvular atrial fibrillation (NVAF) in the United Kingdom (UK).

**Design:** Population-based cross-sectional study

**Setting:** UK primary care

**Population:** 30,467 patients with NVAF and a first prescription for apixaban, dabigatran or rivaroxaban between January 2011 and December 2016.

**Main outcome measures:** Percentage of patients prescribed NOAC dose according to the European Union [EU] labels (appropriately dosed), and not according to the EU labels (inappropriately dosed – including both underdosed and overdosed patients); percentage of patients prescribed an initial NOAC dose according to renal function status.

**Results:** A total of 15,252 (50.1%) patients started NOAC therapy on rivaroxaban, 10,834 (35.6%) on apixaban and 4381 (14.4%) on dabigatran. Among patients starting NOAC therapy on rivaroxaban, 17.3% were eligible to receive a reduced dose compared with 12.8% of patients starting on apixaban and 53.8% of patients starting on dabigatran. The majority of patients were prescribed an appropriate dose according to the EU labels: apixaban 74.9 %, dabigatran, 74.4%; rivaroxaban, 84.2%. Underdosing occurred in 21.6% (apixaban), 8.7% (dabigatran), 9.1% (rivaroxaban). Overdosing was more frequent for dabigatran (16.9%) than for rivaroxaban (6.6%) or apixaban (3.5%). There was a trend towards dose reduction with increasing renal impairment. Among patients with severe renal

1  
2  
3 impairment, the majority received a reduced dose NOAC: apixaban, 91.1%, dabigatran,  
4  
5 80.0%, rivaroxaban, 83.0%.  
6  
7

8 **Conclusion:** Between 2011 and 2016, the majority of patients starting NOAC therapy in UK  
9  
10 primary care were prescribed a daily dose in line with the approved EU drug label.  
11  
12 Underdosing was more than twice as common among patients starting on apixaban than  
13  
14 those starting on dabigatran or rivaroxaban. Research into the patient characteristics that  
15  
16 may influence inappropriate underdosing of NOACs in UK primary care is warranted.  
17  
18  
19  
20  
21  
22  
23  
24  
25  
26  
27  
28  
29  
30  
31  
32  
33  
34  
35  
36  
37  
38  
39  
40  
41  
42  
43  
44  
45  
46  
47  
48  
49  
50  
51  
52  
53  
54  
55  
56  
57  
58  
59  
60



## STRENGTHS AND LIMITATIONS OF THE STUDY

- Our study is the first to comprehensively evaluate the appropriateness of the initial prescribed daily dose of NOACs to patients with NVAF in the UK according to the approved EU drug labels, and the largest of its kind worldwide.
- Our large sample size was derived from two population-based data sources representative of the UK general population, both of which contained data on bodyweight
- A potential limitation of study is that a small degree of misclassification for renal function and bodyweight may have occurred due to inaccuracies in data recording, which may have affected our findings for a small proportion of patients.
- Potential overdosing may have been overestimated because patients may have split a prescribed standard dose over more than one day.

## INTRODUCTION

Recent years have seen a rapid increase in the proportion of patients with atrial fibrillation (AF) starting anticoagulant therapy with a non-vitamin K antagonist oral anticoagulant (NOAC), replacing use of vitamin K antagonists (VKAs) as leading oral anticoagulant (OAC) therapy, both in the United Kingdom (UK),<sup>1-3</sup> and elsewhere in Europe.<sup>4-7</sup> Decisions to prescribe standard or reduced dose NOACs are made on the basis of specific considerations such as age, weight, renal function, and use of specific concomitant medications. Descriptive data show that a high proportion of patients with AF initiating anticoagulant therapy with a NOAC are prescribed a reduced dose,<sup>4-10</sup> particularly in Europe,<sup>8,9</sup> with evidence to suggest that many of these patients do not satisfy the necessary dose reduction criteria as specified on the drug labels.<sup>10-15</sup> In Europe, studies describing the appropriate dosing of prescribed NOACs have been conducted in smaller cohorts<sup>8-12-14</sup> and/or limited to a particular drug,<sup>8,14</sup> and we are unaware of any conducted in patients with NVAF in the UK. Therefore, using routinely-collected primary care electronic health records (EHRs), we conducted a large population-based study with the aim of evaluating the level of appropriate prescribing (consistency with the approved drug label) of standard and reduced dose NOACs in over 30,000 patients with NVAF initiating therapy with a NOAC between 2011 and 2016. To our knowledge, our study is the largest of its kind among patients with AF in routine clinical practice worldwide.

## METHODS

### Data sources

We used data from The Health Improvement Network (THIN) and the Clinical Practice Research Datalink (CPRD)-GOLD in the UK – two similarly structured validated databases of

1  
2  
3 anonymized primary care EHRs representative of the UK demographic.<sup>16-19</sup> The databases  
4  
5 hold clinical and prescribing information entered by general practitioners (GPs) as part of  
6  
7 routine patient care, and cover approximately 5% and 7% of the UK population,  
8  
9  
10 respectively. The study protocol were approved by independent Scientific Research  
11  
12 Committees (reference SRC 17THIN014 for THIN, and ISAC 17\_020R for CPRD). Data  
13  
14 collection for THIN was approved by the South East Multicentre Research Ethics Committee  
15  
16 in 2003 and individual studies using THIN data do not require separate ethical approval if  
17  
18 only anonymized THIN data is used. Similarly, the CPRD has been granted generic ethics  
19  
20 approval for individual studies that make use of only anonymised data.  
21  
22  
23  
24  
25  
26  
27

### 28 **Study population**

29  
30 We identified patients aged  $\geq 18$  years with a first recorded prescription (index date) for  
31  
32 apixaban, dabigatran or rivaroxaban between 01 January 2011 and 31 December 2016.  
33  
34 Patients were required to have been registered with a GP for at least 1 year before their  
35  
36 first NOAC prescription and have at least 1 year prescription history. We subsequently  
37  
38 identified patients with NVAf as those with a record of AF any time before the index date or  
39  
40 in the 2 weeks after, and with no record of heart valve replacement or mitral stenosis during  
41  
42 this time. We excluded patients with a record of deep vein thrombosis, pulmonary  
43  
44 embolism, or hip/knee replacement surgery in the 3 months before the index date because  
45  
46 these could all have been alternative reasons for NOAC initiation. As some practices  
47  
48 contribute data to both THIN and CPRD, we included all practices contributing to THIN and  
49  
50 those exclusively contributing to CPRD. To identify and exclude duplicated practices,  
51  
52 matching of anonymized patient characteristics was applied.<sup>20 21</sup>  
53  
54  
55  
56  
57  
58  
59  
60

### NOAC study cohorts

Three mutually exclusive cohorts were identified based on the first prescribed NOAC (index NOAC) for stroke prevention in AF, either dabigatran (a direct thrombin inhibitor), apixaban or rivaroxaban (both direct factor Xa inhibitors). Edoxaban – another direct factor Xa inhibitor – was only relatively recently approved by the EMA and recommended by NICE (June and September 2015, respectively), therefore we anticipated prescribing levels would not be sufficiently high for robust analysis and thus excluded new users of edoxaban. Identification of the study cohorts is depicted in (**Supplementary Figure 1.**) Patients who were prescribed two different NOACs on the same day were excluded. Patients qualifying as a new user of more than one NOAC during the study period with different index dates (i.e. switchers), were assigned to the cohort of the first prescribed NOAC. Patients were categorised as OAC non-naïve if they had a prescription for any oral anticoagulant before their index NOAC (or a clinical entry implying previous use of any oral anticoagulant, warfarin monitoring or international normalized ratio >2), otherwise they were considered to be OAC-naive.

### Renal function and other patient characteristics

We calculated the daily dose of the index NOAC based on the product instructions (quantity, pack size, number of tablets and posology) for the first recorded NOAC prescription. We also extracted information on patients' age, renal function and weight at the time of the index date, using the most recently recorded values. Patients' renal function was ascertained using the closest valid serum creatinine value to the index date (within the year before) to estimate glomerular filtration rate (eGFR) expressed as mL/min/1.73m<sup>2</sup> applying the Chronic Kidney Disease Epidemiology Collaboration equation,<sup>22</sup> but omitting ethnicity because this is

1  
2  
3 not routinely recorded in UK primary care. Individuals with no valid serum creatinine  
4  
5 measurement were assigned to a category 'unknown'. Information on lifestyle variables  
6  
7 (smoking status and body mass index [BMI]) was collected, using the most recently recorded  
8  
9 value/status before the index date. CHA<sub>2</sub>DS<sub>2</sub>Vasc score for stroke risk was calculated  
10  
11 according to patients' recorded history of congestive heart failure, hypertension, age,  
12  
13 diabetes mellitus and prior stroke/transient ischaemic attack (CHADS score was also  
14  
15 calculated because this was assessed in the pivotal studies for the NOACs investigated in  
16  
17 this study). HAS-BLED score for major bleeding risk was calculated using recorded history of  
18  
19 hypertension, renal disease, liver disease, stroke history, prior major bleeding or  
20  
21 predisposition to bleeding, age >65 years, medication use predisposing to bleeding, and  
22  
23 alcohol use. We also estimated frailty using an adaptation of a frailty index developed from  
24  
25 data recorded in primary care databases,<sup>23</sup> and categorised patients as fit, mildly frail,  
26  
27 moderately frail or severely frail.  
28  
29  
30  
31  
32  
33  
34  
35  
36  
37  
38

### 39 **Recommendations for NOAC dosing**

40  
41 We categorised patients as eligible for standard or reduced dose NOAC therapy or ineligible  
42  
43 for NOAC therapy (i.e. contraindicated) based on all information in the approved European  
44  
45 Union (EU) label for each respective NOAC, adapted to the information recorded in the  
46  
47 databases (**Supplementary Table 1**). For the prevention of stroke and systemic embolism in  
48  
49 adults with NVAf, the recommended standard dosages according to the EU labels are 5 mg  
50  
51 twice daily for apixaban, 150 mg twice daily for dabigatran and 20 mg once daily for  
52  
53 rivaroxaban; the recommended reduced dosages are 2.5 mg twice daily for apixaban,  
54  
55 110 mg twice daily for dabigatran and 15 mg once daily for rivaroxaban. Hereafter, for  
56  
57  
58  
59  
60

1  
2  
3 simplicity, we refer to these dosages as 'daily dose'. Dose reduction recommendations for  
4  
5 rivaroxaban are based on renal function, while dose reduction for dabigatran considers  
6  
7 renal function, age, concomitant medications and other comorbidities. For apixaban, at  
8  
9 least two of the following criteria are to be met for dose reduction:  $\geq 80$  years, body weight  
10  
11  $\leq 60$  kg, serum creatinine  $\geq 1.5$  mg/dL. Also, patients with renal impairment creatinine  
12  
13 clearance 15-29 mL/min patients are recommended to receive the reduced dose of  
14  
15 apixaban. We therefore defined appropriate dosing as a patient being prescribed the  
16  
17 correct recommended dose based on the approved EU label. Potential inappropriate dosing  
18  
19 was defined as a patient being prescribed a dose not in line with the EU label – this included  
20  
21 both underdosed patients (prescribing of a reduced dose NOAC to patients eligible for a  
22  
23 standard dose) and overdosed patients (prescribing of a higher dose than recommended or  
24  
25 any dose when contraindicated).

### 33 **Statistical analysis**

34  
35 Patient characteristics were described according to the daily dose of the index NOAC  
36  
37 (standard or reduced), using frequency counts and percentages for quantitative variables,  
38  
39 and means with standard deviation (SD) for continuous variables. For each NOAC cohort, we  
40  
41 calculated the percentage of patients appropriately dosed, both overall and according to  
42  
43 whether the daily dose of the index NOAC was a standard or reduced dose. For this  
44  
45 calculation, patients with missing data on renal function were assumed to have normal renal  
46  
47 function, and those with missing data on weight (when analysing apixaban dosing) were  
48  
49 assumed to have a weight above 60 kg. To determine if NOAC prescription patterns were  
50  
51 influenced by renal status alone, we further evaluated the initial daily dose prescribed  
52  
53 according to renal function, categorised as normal ( $eGFR > 50$  mL/min/1.73 m<sup>2</sup>), mild-to-  
54  
55  
56  
57  
58  
59  
60

1  
2  
3 moderate impairment (eGFR 30–50 mL/min/1.73 m<sup>2</sup>) and severe impairment (eGFR<30  
4 mL/min/1.73 m<sup>2</sup>). All analyses were undertaken using STATA version 12.0.  
5  
6  
7

### 8 **Patient and public involvement**

9  
10 This was a descriptive study using routinely collected primary care data in the UK. There was  
11  
12 no public or patient involvement in the conception of the research question, the design and  
13  
14 implementation of the study, or the writing of the manuscript.  
15  
16  
17

## 18 **RESULTS**

19  
20 During the study period, there were a total of 30,467 new users of a NOAC with a record of  
21  
22 NVAf and no other recent indication for anticoagulation; 10,834 (35.6%) started on  
23  
24 apixaban, 4381 (14.4%) started on dabigatran, and 15,252 (50.1%) started on rivaroxaban.  
25  
26  
27  
28  
29

### 30 **Patient characteristics by daily dose at index NOAC prescription**

31  
32 Characteristics of the study cohorts stratified by the total daily dose of the index NOAC  
33  
34 prescription (standard or reduced) are shown in **Table 1**, and the frequency distribution of  
35  
36 the daily dose of the index NOAC prescription is shown in **Supplementary Table 2**.  
37  
38  
39

40  
41 A reduced NOAC dose was prescribed in the majority of patients with impaired renal  
42  
43 function. Among patients receiving a standard dose, the apixaban cohort had the highest  
44  
45 proportion of OAC-naïve patients (55.4% vs. 45% for dabigatran and 48.6% for rivaroxaban).  
46  
47  
48

49  
50 Most patients prescribed a standard dose had normal renal function. Among patients  
51  
52 prescribed a reduced dose NOAC, the majority were aged 70 years or older and were  
53  
54 moderately or severely frail. Bleeding risk (according to the HAS-BLED score) was similar  
55  
56 between the three cohorts, and was higher among patients prescribed reduced NOAC doses  
57  
58 (mean 2.0, SD 0.9) than among patients receiving standard doses (mean 1.6; SD 0.9).  
59  
60

1  
2  
3 Approximately three quarters of the patients in each cohort who were prescribed a reduced  
4  
5 dose had a high stroke risk index (CHA<sub>2</sub>DS<sub>2</sub>VASc score of  $\geq 4$ ).  
6  
7  
8  
9

### 10 **Overall appropriateness of index NOAC daily dose**

11  
12 Characteristics of patients appropriately or inappropriately dosed in accordance with the  
13  
14 drug label can be found in **Supplementary Table 3**. The percentage of patients appropriately  
15  
16 dosed, underdosed and overdosed among all patients in each study cohort is shown in  
17  
18 **Figure 1**. The majority of patients (76.9%) starting NOAC therapy were prescribed an  
19  
20 appropriate dose; 74.9% of patients on apixaban, 74.4% on dabigatran and 84.2% on  
21  
22 rivaroxaban. Underdosing was more frequent in the apixaban cohort (21.6% of patients)  
23  
24 than in the dabigatran (8.7% of patients) and rivaroxaban (9.1%) cohorts. Overdosing was  
25  
26 more frequent in the dabigatran cohort (16.9%) than in the rivaroxaban (6.6%) or apixaban  
27  
28 (3.5%) cohorts. Little difference was seen in the level of appropriate prescribing when  
29  
30 analyses were stratified by whether patients had previously been prescribed a vitamin K  
31  
32 antagonist (non-naïve) or not (naïve) (**Supplementary Tables 4a to 4d**).  
33  
34  
35  
36  
37  
38  
39  
40  
41  
42

### 43 **Appropriateness of NOAC prescription by eligibility to receive a standard or reduced dose**

44  
45 As shown in **Table 2**, the majority of patients in the apixaban and rivaroxaban cohorts were  
46  
47 eligible to receive the standard treatment dose, 84.9% (9194/10,834) for apixaban and  
48  
49 82.7% (12,608/15,252) for rivaroxaban, while in the dabigatran cohort less than half (40.9%;  
50  
51 1790/4381) were eligible for the standard dose. The percentage of users eligible to receive  
52  
53 the reduced treatment dose was 12.8% for apixaban, 53.8% for dabigatran and 17.3% for  
54  
55 rivaroxaban. Among all patients eligible to receive a standard dose NOAC (N=23,591), the  
56  
57 majority received the correct standard dose (82.3%); this percentage was highest for  
58  
59  
60



1  
2  
3 rivaroxaban (88.5%) followed by dabigatran (78.7%) and apixaban (74.5%). However, a  
4  
5 quarter of apixaban patients (25.5%, 2344/9194) eligible to receive the recommended  
6  
7 standard daily dose were prescribed a reduced dose, compared with 21.3% (381/1790) in  
8  
9 the dabigatran cohort and 11.0% (1390/12,608) in the rivaroxaban cohort. Among patients  
10  
11 inappropriately prescribed a reduced dose of apixaban (n=2344), 73.1% met only one dose-  
12  
13 reduction criteria with the remaining meeting no dose-reduction criteria. Among patients  
14  
15 eligible for reduced dosing, the majority correctly received a reduced dose: apixaban  
16  
17 (91.0%), dabigatran (78.4%) and rivaroxaban (63.9%).  
18  
19  
20  
21  
22  
23  
24  
25

### 26 **Appropriateness of NOAC prescription among patients prescribed a standard or reduced** 27 28 **dose**

29  
30 Among patients starting NOAC therapy on a standard daily dose, the prescription was  
31  
32 appropriate for the vast majority of those in the apixaban cohort (97.0%) and rivaroxaban  
33  
34 cohort (92.3%), but for fewer patients in the dabigatran cohort (69.8%) (**Supplementary**  
35  
36 **Figure 2**). Among patients starting NOAC therapy on a reduced dose, this was appropriate in  
37  
38 only 33.4% of patients in the apixaban cohort compared with 78.2% of the dabigatran  
39  
40 cohort and 54.7% of the rivaroxaban cohort (**Supplementary Figure 2**).  
41  
42  
43  
44  
45  
46  
47

### 48 **Dosing by degree of renal impairment**

49  
50 The daily dose of the index NOAC prescription according to renal function is shown in  
51  
52 **Figure 2** (approximately 1 in 8 patients in each cohort had unknown renal function). In all  
53  
54 three cohorts, there was a trend towards dose reduction with increasing renal impairment.  
55  
56 Among patients with severe renal impairment (eGFR<30 mL/min /1.73 m<sup>2</sup>), most were  
57  
58  
59  
60

1  
2  
3 prescribed a reduced daily dose: apixaban (91.1%,  $\leq 5$ mg), dabigatran (80.0%,  $\leq 200$  mg) and  
4  
5 rivaroxaban (83.0%, 15 mg). However, reduced doses were also prescribed to patients with  
6  
7 no evidence of renal impairment, especially among the dabigatran cohort (50.1%,  
8  
9 1634/3259; mostly 220 mg/day) followed by apixaban (26.7% (1968/7291; nearly all  
10  
11 5 mg/day), and least frequently for rivaroxaban (10.3%, 1105/10,699; mostly 15 mg/day)  
12  
13  
14  
15 users.  
16  
17  
18  
19

### 20 **NOAC daily dose over time**

21  
22 As shown in **Supplementary Table 5**, among patients with at least 6 months of follow-up  
23  
24 and a continuous user of a NOAC at 6 months (i.e. no gaps of more than 30 days between  
25  
26 the end of supply of one prescription and the start of the next), the vast majority were  
27  
28 prescribed the same dose of the index NOAC at 6 months (95.4% for apixaban, 93.7% for  
29  
30 dabigatran and 94.5% for rivaroxaban). Among patients whose were underdosed at the  
31  
32 index date and who also had at least 6 months of follow-up, the majority still received an  
33  
34 underdosed prescription 6 months after their initial underdosed prescription: apixaban  
35  
36 90.2%, dabigatran 82.0% and rivaroxaban 84.6%. Baseline doses of the index NOAC among  
37  
38 patients who were, or who were not, continuous users of a NOAC at 6 months are shown in  
39  
40  
41  
42  
43  
44  
45 **Supplementary Table 6**).  
46  
47  
48  
49

### 50 **DISCUSSION**

51  
52 Between 2011 and 2016, the majority of patients with NVAF starting therapy with a NOAC in  
53  
54 UK primary care were prescribed an appropriate daily dose based on the approved EU label,  
55  
56 according to the information recorded in THIN and CPRD-GOLD. However, notable  
57  
58 differences were seen in the level of underdosing between individual NOACs, being more  
59  
60

1  
2  
3 than twice as frequent among patients starting treatment on apixaban compared with those  
4  
5 starting on dabigatran or rivaroxaban.  
6  
7

8 Our study is the first to comprehensively evaluate the appropriateness of the initial  
9  
10 prescribed daily dose of NOACs to patients with NVAF in the UK according to the approved  
11  
12 EU drug labels, and the largest of its kind worldwide. Also, few other studies have compared  
13  
14 levels of potential underdosing and overdosing between individual NOACs. The large sample  
15  
16 from two population-based data sources representative of the UK general population is a  
17  
18 key strength, as is the fact that all medications prescribed by the GP will have been captured  
19  
20 because they are automatically recorded upon issue. Another strength is that, unlike other  
21  
22 healthcare databases, THIN and CPRD-GOLD contain data on all criteria, including  
23  
24 bodyweight, required to make an accurate assessment of appropriate NOAC dosing. In  
25  
26 terms of our study's limitations, we evaluated the dose of the first NOAC prescription issued  
27  
28 in primary care and not subsequent prescriptions; however, the majority of patients had  
29  
30 continued on the same dose of the index NOAC 6 months after treatment initiation.  
31  
32 Additionally, although the very first NOAC prescription may have been issued in secondary  
33  
34 care and this will not have been captured in the primary care databases, we believe it is  
35  
36 unlikely that the first NOAC prescription issued in primary care would be a different dose to  
37  
38 that issued by a specialist with the relevant expertise. A small degree of misclassification for  
39  
40 renal function and bodyweight may have occurred due to inaccuracies in data recording,  
41  
42 which may have affected our findings for a small proportion of patients. Also, potential  
43  
44 overdosing may have been overestimated because patients may have split a prescribed  
45  
46 standard dose over more than one day, and likewise potential underdosing may have  
47  
48 occurred if patients were instructed to spread out their prescribed medication, although we  
49  
50 feel this is unlikely.  
51  
52  
53  
54  
55  
56  
57  
58  
59  
60

1  
2  
3  
4  
5  
6 Potential underdosing of NOACs has been reported in moderate-to-large studies from the  
7  
8 US,<sup>10 11</sup> as well as in smaller studies from Europe, North America<sup>12-14</sup> and Israel,<sup>15</sup> with  
9  
10 findings indicative of variation in the level of inappropriate NOAC dosing between countries.  
11  
12 Using data from 7925 patients with AF in the Outcomes Registry for Better Informed  
13  
14 Treatment of Atrial Fibrillation II (ORBIT-AF II) registry, Steinberg *et al*,<sup>10</sup> reported that 57%  
15  
16 (734/1289) of patients prescribed a reduced dose NOAC did not fulfill the Food and Drug  
17  
18 Administration's (FDAs) recommended criteria for dose reduction. A larger administrative  
19  
20 claims database study of 14,865 patients with AF initiating NOAC treatment reported a  
21  
22 much lower level of underdosing with 13.3% (1781/13,392) of patients with no renal  
23  
24 indication for dose reduction receiving a reduced dose,<sup>11</sup> although other criteria for dose  
25  
26 reduction were not assessed. A large administrative healthcare database study in Israel  
27  
28 reported very high levels of inappropriate prescribing of low-dose NOACs, occurring in 84%  
29  
30 of patients prescribed reduced dose dabigatran, 68% of those prescribed reduced dosed  
31  
32 apixaban and 78.5% of those prescribed reduced dose rivaroxaban. It is unclear what factors  
33  
34 might underlie the marked difference in findings between studies yet it is clear that  
35  
36 inappropriate underdosing is not uncommon. In our analyses, the percentage of patients  
37  
38 receiving a reduced dose differed between the individual NOACs, occurring more than twice  
39  
40 as frequently among patients prescribed apixaban or dabigatran than those prescribed  
41  
42 rivaroxaban. One can speculate that this finding may reflect the criteria for dose reduction  
43  
44 for the former two NOACs with respect to apixaban and dabigatran although it was not  
45  
46 possible to substantiate this with the current study design. Studies from Europe have been  
47  
48 small but also suggest that underdosing may be more prevalent for apixaban than  
49  
50 rivaroxaban. In Germany, Bucholtz *et al*<sup>8</sup> found that among 268 patients with NVAF starting  
51  
52  
53  
54  
55  
56  
57  
58  
59  
60

1  
2  
3 reduced dose apixaban therapy in 2016, 60.8% did not meet labelling criteria for dose  
4  
5 reduction, while in a study of 899 patients with NVAf starting rivaroxaban therapy in the  
6  
7 Netherlands, Pisters *et al*<sup>14</sup> reported that 3.1% received a label-discordant dose. In the US,  
8  
9 Yao *et al*<sup>11</sup> found that 43% of patients with a renal indication for NOAC dose reduction did  
10  
11 not receive a reduced dose, while Steinberg *et al*<sup>10</sup> found that 32% of NVAf patients eligible  
12  
13 for dose reduction according to the FDA approved drug labels received a standard dose  
14  
15 NOAC. This is similar to the level of potential rivaroxaban overdosing in our study. Whether  
16  
17 differences in levels of inappropriate prescribing between studies relates to differences  
18  
19 between study populations or completeness of data in the information sources is unclear,  
20  
21 but patients in our study were on average 4 years older than those in the ORBIT-II registry  
22  
23 (75 vs. 71 years) and previous gastrointestinal bleeding was more frequent (14% vs. 4%).  
24  
25  
26  
27  
28  
29  
30  
31

32  
33 Inappropriate dosing of NOACs has concerning clinical implications because patients may  
34  
35 not receive the benefits of the recommended NOAC dose in protecting against stroke and  
36  
37 systemic embolism. Data from the ORBIT-II registry suggest that patients receiving an  
38  
39 inappropriately reduced NOAC dose have less favourable outcomes in terms of  
40  
41 thromboembolic events and death.<sup>10</sup> Yao *et al*<sup>11</sup> found that among apixaban-treated  
42  
43 patients with no renal justification for dose reduction, those receiving the reduced dose had  
44  
45 a significantly higher risk of stroke with no significant change in the risk of bleeding when  
46  
47 compared with those receiving the standard dose. Reasons why GPs prescribe reduced  
48  
49 NOAC doses to patients with no justification for dose reduction are unclear. It is possible  
50  
51 that NOAC-related bleeding may be more concerning to physicians than reduced stroke  
52  
53 prophylaxis. Although, contrary to expectations, Steinberg *et al*<sup>10</sup> found that patients  
54  
55 inappropriately prescribed a reduced dose of a NOAC were significantly younger and had  
56  
57  
58  
59  
60

1  
2  
3 lower bleeding scores than those appropriately dose-reduced. In our study, we saw a trend  
4  
5 of dose reduction with worsening renal function. In addition, the majority of patients  
6  
7 started on a reduced dose NOAC were moderately or severely frail. It is therefore possible  
8  
9 that some GPs are exercising caution among patients with renal function values close to the  
10  
11 qualifying cut-offs and/or among frail individuals. For apixaban, being close to the cut-offs  
12  
13 for age and bodyweight could also influence prescribing In the study by Bucholtz *et al*<sup>8</sup> there  
14  
15 were 163 apixaban patients who received a reduced dose despite being eligible for the  
16  
17 higher dose, and among these a substantial percentage met either only one (57.1%) or no  
18  
19 (42.9%) dose-reduction criteria, with these patients more often having ages, weights and  
20  
21 serum creatinine levels close to the cut-off values compared with patients prescribed an  
22  
23 appropriate dose. In our study, the majority (73.1%) of patients inappropriately prescribed a  
24  
25 reduced dose of apixaban met only one dose reduction criteria. Our findings also pointed to  
26  
27 some potential overdosing of NOACs, and as shown by others to increase bleeding risk.<sup>11</sup>  
28  
29 Notwithstanding our study's limitation in assessing overdosing, the possibility of overdosing  
30  
31 prescribing habits among some UK GPs cannot be excluded.  
32  
33  
34  
35  
36  
37  
38  
39  
40  
41

42 Our findings underscore the importance of monitoring the prescribing of NOACs in the post-  
43  
44 marketing period. Research is warranted into reasons for the inappropriate prescribing of  
45  
46 reduced and standard dose NOACs in UK primary care, and the patient characteristics that  
47  
48 may influence this. Additionally, research is needed into the impact that inappropriate  
49  
50 dosing of NOACs has on risks of clinical outcomes, including stroke, systemic embolism and  
51  
52 major bleeding in this setting, and ways to improve levels of correct dosing to ensure  
53  
54 patients receive maximum benefit from treatment.  
55  
56  
57  
58  
59  
60

## ACKNOWLEDGEMENTS

This study was funded by Bayer AG. We thank Susan Bromley, EpiMed Communications Ltd (Oxford, UK) for medical writing assistance funded by Bayer AG.

**Funding:** This work was supported by Bayer AG.

**Competing interests:** PV, YB, KS-W and BS are employees of Bayer AG (Germany), the funder of the study; GB is an employee of Bayer AB, (Stockholm, Sweden); LR and SF are employees of Bayer PLC (Reading, UK). KS-W declares Bayer stocks; LR and SF declare shares in Bayer. LAGR, MM-P and AR work for the Spanish Centre for Pharmacoepidemiologic Research (Madrid, Spain), which has received research funding from Bayer AG. LAGR also declares honoraria for serving on advisory boards for Bayer AG.

**Author contributions:** LR and SF developed the concept for the research study. LR, SF, LAGR, AR, GB, PV, KS-W and YB planned the study. AR, MM-P and LAGR conducted the study. All authors (LAGR, AR, MM-P, LR, SF, GB, PV, KS-W, YB and BS) interpreted the data, reviewed drafts of the manuscript, and approved the final version of the article for publication.

**Data sharing:** Data are available from the corresponding author upon reasonable request.

## REFERENCES

1. Loo SY, Dell'Aniello S, Huiart L, et al. Trends in the prescription of novel oral anticoagulants in UK primary care. *Br J Clin Pharmacol* 2017;83(9):2096–106. doi: 10.1111/bcp.13299 [published Online First: 2017/04/09]
2. Ruigomez A, Brobert G, Vora P, et al. Trends in use of rivaroxaban for prophylaxis and treatment in general practice in the United Kingdom between 2012 and 2015. *Pharmacoepidemiology and Drug Safety* 2018;27(S2) doi: DOI: 10.1002/pds.4629

- 1  
2  
3 3. Vinogradova Y, Coupland C, Hill T, et al. Risks and benefits of direct oral anticoagulants  
4  
5 versus warfarin in a real world setting: cohort study in primary care. *BMJ*  
6  
7 2018;362:k2505. doi: 10.1136/bmj.k2505 [published Online First: 2018/07/06]  
8  
9
- 10 4. Fay MR, Martins JL, Czekay B. Oral anticoagulant prescribing patterns for stroke  
11  
12 prevention in atrial fibrillation among general practitioners and cardiologists in three  
13  
14 European countries. *European Heart Journal* 2016;37(Supplement 1 (August  
15  
16 2016)):510 (P2597 Abstract).  
17  
18
- 19 5. Schuh T, Reichardt B, Finsterer J, et al. Age-dependency of prescribing patterns of oral  
20  
21 anticoagulant drugs in Austria during 2011-2014. *J Thromb Thrombolysis*  
22  
23 2016;42(3):447–51. doi: 10.1007/s11239-016-1380-110.1007/s11239-016-1380-1  
24  
25 [pii] [published Online First: 2016/05/26]  
26  
27
- 28 6. Bjerring Olesen JB, Sorensen R, Hansen ML, et al. Non-vitamin K antagonist oral  
29  
30 anticoagulation agents in anticoagulant naive atrial fibrillation patients: Danish  
31  
32 nationwide descriptive data 2011-2013. *Europace* 2015;17(2):187–93. doi:  
33  
34 10.1093/europace/euu225 euu225 [pii] [published Online First: 2014/09/23]  
35  
36  
37
- 38 7. Kjerpeseth LJ, Ellekjaer H, Selmer R, et al. Trends in use of warfarin and direct oral  
39  
40 anticoagulants in atrial fibrillation in Norway, 2010 to 2015. *Eur J Clin Pharmacol*  
41  
42 2017;73(11):1417–25. doi: 10.1007/s00228-017-2296-1 [published Online First:  
43  
44 2017/07/25]  
45  
46  
47
- 48 8. Buchholz A, Ueberham L, Gorczynska K, et al. Initial apixaban dosing in patients with atrial  
49  
50 fibrillation. *Clin Cardiol* 2018;41(5):671–76. doi: 10.1002/clc.22949 [published Online  
51  
52 First: 2018/03/16]  
53  
54  
55
- 56 9. Staerk L, Gerds TA, Lip GYH, et al. Standard and reduced doses of dabigatran, rivaroxaban  
57  
58 and apixaban for stroke prevention in atrial fibrillation: a nationwide cohort study. *J*  
59  
60



- 1  
2  
3 *Intern Med* 2018;283(1):45–55. doi: 10.1111/joim.12683 [published Online First:  
4  
5 2017/09/02]  
6  
7
- 8 10. Steinberg BA, Shrader P, Pieper K, et al. Frequency and Outcomes of Reduced Dose Non-  
9  
10 Vitamin K Antagonist Anticoagulants: Results From ORBIT-AF II (The Outcomes  
11  
12 Registry for Better Informed Treatment of Atrial Fibrillation II). *J Am Heart Assoc*  
13  
14 2018;7(4) doi: e007633 [pii]10.1161/JAHA.117.007633 JAHA.117.007633 [pii]  
15  
16 [published Online First: 2018/02/18]  
17  
18
- 19 11. Yao X, Shah ND, Sangaralingham LR, et al. Non-Vitamin K Antagonist Oral Anticoagulant  
20  
21 Dosing in Patients With Atrial Fibrillation and Renal Dysfunction. *J Am Coll Cardiol*  
22  
23 2017;69(23):2779–90. doi: S0735-1097(17)37006-7 [pii] 10.1016/j.jacc.2017.03.600  
24  
25 [published Online First: 2017/06/10]  
26  
27
- 28 12. Barra ME, Fanikos J, Connors JM, et al. Evaluation of Dose-Reduced Direct Oral  
29  
30 Anticoagulant Therapy. *Am J Med* 2016;129(11):1198–204. doi: S0002-  
31  
32 9343(16)30599-X [pii]10.1016/j.amjmed.2016.05.041 [published Online First:  
33  
34 2016/10/25]  
35  
36
- 37 13. Lavoie K, Turgeon MH, Brais C, et al. Inappropriate dosing of direct oral anticoagulants in  
38  
39 patients with atrial fibrillation. *J Atr Fibrillation* 2016;9(4):1478. doi:  
40  
41 10.4022/jafib.1478 [published Online First: 2017/12/19]  
42  
43  
44
- 45 14. Pisters R, van Vugt SPG, Brouwer MA, et al. Real-life use of Rivaroxaban in the  
46  
47 Netherlands: data from the Xarelto for Prevention of Stroke in Patients with Atrial  
48  
49 Fibrillation (XANTUS) registry. *Neth Heart J* 2017;25(10):551–58. doi:  
50  
51 10.1007/s12471-017-1009-9 [pii] [published Online  
52  
53 First: 2017/07/05]  
54  
55  
56  
57  
58  
59  
60

- 1  
2  
3  
4 15. Ellis MH, Dotan SG, Hammerman A, et al. Appropriateness of non-vitamin K antagonist  
5  
6 oral anticoagulant dose in patients with atrial fibrillation in Israel: A population-  
7  
8 based study. *Thromb Res* 2018;169:140–42. doi: S0049-3848(18)30441-9  
9  
10 [pii]10.1016/j.thromres.2018.07.024 [published Online First: 2018/07/30]  
11  
12
- 13 16. Blak BT, Thompson M, Dattani H, et al. Generalisability of The Health Improvement  
14  
15 Network (THIN) database: demographics, chronic disease prevalence and mortality  
16  
17 rates. *Inform Prim Care* 2011;19(4):251–5. [published Online First: 2011/01/01]  
18  
19
- 20 17. Herrett E, Gallagher AM, Bhaskaran K, et al. Data Resource Profile: Clinical Practice  
21  
22 Research Datalink (CPRD). *Int J Epidemiol* 2015;44(3):827–36. doi:  
23  
24 10.1093/ije/dyv098dyv098 [pii] [published Online First: 2015/06/08]  
25  
26
- 27 18. Herrett E, Thomas SL, Schoonen WM, et al. Validation and validity of diagnoses in the  
28  
29 General Practice Research Database: a systematic review. *Br J Clin Pharmacol*  
30  
31 2010;69(1):4–14. doi: 10.1111/j.1365-2125.2009.03537.xBCP3537 [pii] [published  
32  
33 Online First: 2010/01/19]  
34  
35
- 36 19. Lewis JD, Schinnar R, Bilker WB, et al. Validation studies of the health improvement  
37  
38 network (THIN) database for pharmacoepidemiology research. *Pharmacoepidemiol*  
39  
40 *Drug Saf* 2007;16(4):393–401. doi: 10.1002/pds.1335 [published Online First:  
41  
42 2006/10/27]  
43  
44  
45  
46
- 47 20. Cai B, Xu W, Bortnichak E, et al. An algorithm to identify medical practices common to  
48  
49 both the General Practice Research Database and The Health Improvement Network  
50  
51 database. *Pharmacoepidemiol Drug Saf* 2012;21(7):770–74. doi: 10.1002/pds.3277  
52  
53 [published Online First: 2012/05/01]  
54  
55  
56  
57  
58  
59  
60

- 1  
2  
3 21. Plana E, McGrath LJ, Fortuny J, et al. An Algorithm to Identify Duplicate Patients When  
4  
5 Pooling Aggregate Data From Two Primary Care Databases in the United Kingdom.  
6  
7 *Pharmacoepidemiology and Drug Safety* 2016;25(S3):58-59.  
8  
9  
10  
11 22. Levey AS, Stevens LA, Schmid CH, et al. A new equation to estimate glomerular filtration  
12  
13 rate. *Ann Intern Med* 2009;150(9):604–12. doi: 150/9/604 [pii] [published Online  
14  
15 First: 2009/05/06]  
16  
17  
18 23. Clegg A, Bates C, Young J, et al. Development and validation of an electronic frailty index  
19  
20 using routine primary care electronic health record data. *Age Ageing*  
21  
22 2016;45(3):353–60. doi: 10.1093/ageing/afw039 [published Online First:  
23  
24 2016/03/06]  
25  
26  
27  
28  
29  
30  
31  
32  
33  
34  
35  
36  
37  
38  
39  
40  
41  
42  
43  
44  
45  
46  
47  
48  
49  
50  
51  
52  
53  
54  
55  
56  
57  
58  
59  
60

**Table 1.** Baseline characteristics of the cohort of 30,467 new users of NOACs with NVAf and no other recent indication, stratified by dose of first NOAC prescription (standard or reduced dose).

|                                        | Apixaban (N=10,834)              |                                  | Dabigatran (N=4381)              |                                 | Rivaroxaban (N=15,252)*            |                                 |
|----------------------------------------|----------------------------------|----------------------------------|----------------------------------|---------------------------------|------------------------------------|---------------------------------|
|                                        | Standard dose<br>(n=7061; 65.2%) | Reduced dose<br>(n= 3773; 34.8%) | Standard dose<br>(n=2018; 46.1%) | Reduced dose<br>(n=2363; 53.9%) | Standard dose<br>(n=12,091; 79.3%) | Reduced dose<br>(n=3081; 20.2%) |
| <b>Sex</b>                             |                                  |                                  |                                  |                                 |                                    |                                 |
| Male                                   | 4271 (60.5)                      | 1488 (39.4)                      | 1380 (68.4)                      | 1143 (48.4)                     | 7042 (58.2)                        | 1289 (41.8)                     |
| Female                                 | 2790 (39.5)                      | 2285 (60.6)                      | 638 (31.6)                       | 1220 (51.6)                     | 5049 (41.8)                        | 1792 (58.2)                     |
| <b>Age (years)</b>                     |                                  |                                  |                                  |                                 |                                    |                                 |
| <60                                    | 833 (11.8)                       | 63 (1.7)                         | 380 (18.8)                       | 73 (3.1)                        | 1233 (10.2)                        | 66 (2.1)                        |
| 60–69                                  | 1903 (27.0)                      | 177 (4.7)                        | 726 (36.0)                       | 202 (8.5)                       | 2696 (22.3)                        | 199 (6.5)                       |
| 70–79                                  | 2860 (40.5)                      | 676 (17.9)                       | 842 (41.7)                       | 699 (29.6)                      | 4400 (36.4)                        | 715 (23.2)                      |
| ≥80                                    | 1465 (20.7)                      | 2857 (75.7)                      | 70 (3.5)                         | 1389 (58.8)                     | 3762 (31.1)                        | 2101 (68.2)                     |
| Mean age (SD)                          | 71.4 (10.2)                      | 82.8 (7.8)                       | 67.2 (9.1)                       | 79.7 (8.5)                      | 73.6 (10.6)                        | 81.8 (8.5)                      |
| <b>OAC naïve status</b>                |                                  |                                  |                                  |                                 |                                    |                                 |
| Naïve                                  | 3915 (55.4)                      | 1859 (49.3)                      | 909 (45.0)                       | 918 (38.8)                      | 5881 (48.6)                        | 1295 (42.0)                     |
| Non-naïve                              | 3146 (44.6)                      | 1914 (50.7)                      | 1109 (55.0)                      | 1445 (61.2)                     | 6210 (51.4)                        | 1786 (58.0)                     |
| <b>Year of first NOAC prescription</b> |                                  |                                  |                                  |                                 |                                    |                                 |
| 2011–13                                | 184 (2.6)                        | 107 (2.8)                        | 968 (48.0)                       | 1206 (51.0)                     | 1492 (12.3)                        | 479 (15.5)                      |
| 2014–16                                | 6877 (97.4)                      | 3666 (97.2)                      | 1050 (52.0)                      | 1157 (49.0)                     | 10,599 (87.7)                      | 2602 (84.5)                     |
| <b>BMI</b>                             |                                  |                                  |                                  |                                 |                                    |                                 |
| 10–19 (underweight)                    | 117 (1.7)                        | 331 (8.8)                        | 35 (1.7)                         | 139 (5.9)                       | 434 (3.6)                          | 212 (6.9)                       |
| 20–24 (healthy weight)                 | 1322 (18.7)                      | 1201 (31.8)                      | 343 (17.0)                       | 665 (28.1)                      | 2679 (22.2)                        | 875 (28.4)                      |
| 25–29 (overweight)                     | 2599 (36.8)                      | 1228 (32.5)                      | 735 (36.4)                       | 866 (36.6)                      | 4230 (35.0)                        | 1035 (33.6)                     |
| ≥30 (obese)                            | 2766 (39.2)                      | 836 (22.2)                       | 809 (40.1)                       | 593 (25.1)                      | 4291 (35.5)                        | 847 (27.5)                      |
| Unknown                                | 257 (3.6)                        | 177 (4.7)                        | 96 (4.8)                         | 100 (4.2)                       | 457 (3.8)                          | 112 (3.6)                       |
| <b>Smoking</b>                         |                                  |                                  |                                  |                                 |                                    |                                 |
| Non-smoker                             | 2851 (40.4)                      | 1683 (44.6)                      | 784 (38.9)                       | 1015 (43.0)                     | 4876 (40.3)                        | 1282 (41.6)                     |
| Smoker                                 | 605 (8.6)                        | 221 (5.9)                        | 178 (8.8)                        | 126 (5.3)                       | 1015 (8.4)                         | 182 (5.9)                       |
| Ex-smoker                              | 3598 (51.0)                      | 1865 (49.4)                      | 1052 (52.1)                      | 1221 (51.7)                     | 6190 (51.2)                        | 1617 (52.5)                     |
| Unknown                                | 7 (0.1)                          | 4 (0.1)                          | 4 (0.2)                          | 1 (0.0)                         | 10 (0.1)                           | 0 (0.0)                         |

|                                                   | Apixaban (N=10,834)              |                                  | Dabigatran (N=4381)              |                                 | Rivaroxaban (N=15,252)*            |                                 |
|---------------------------------------------------|----------------------------------|----------------------------------|----------------------------------|---------------------------------|------------------------------------|---------------------------------|
|                                                   | Standard dose<br>(n=7061; 65.2%) | Reduced dose<br>(n= 3773; 34.8%) | Standard dose<br>(n=2018; 46.1%) | Reduced dose<br>(n=2363; 53.9%) | Standard dose<br>(n=12,091; 79.3%) | Reduced dose<br>(n=3081; 20.2%) |
| <b>Alcohol (units/week)</b>                       |                                  |                                  |                                  |                                 |                                    |                                 |
| None                                              | 1356 (19.2)                      | 1129 (29.9)                      | 244 (12.1)                       | 526 (22.3)                      | 2244 (18.6)                        | 827 (26.8)                      |
| 1–9                                               | 3044 (43.1)                      | 1663 (44.1)                      | 857 (42.5)                       | 1128 (47.7)                     | 5501 (45.5)                        | 1448 (47.0)                     |
| 10–20                                             | 1316 (18.6)                      | 390 (10.3)                       | 422 (20.9)                       | 315 (13.3)                      | 1975 (16.3)                        | 316 (10.3)                      |
| 21–41                                             | 470 (6.7)                        | 128 (3.4)                        | 219 (10.9)                       | 99 (4.2)                        | 821 (6.8)                          | 95 (3.1)                        |
| ≥42                                               | 227 (3.2)                        | 48 (1.3)                         | 92 (4.6)                         | 45 (1.9)                        | 354 (2.9)                          | 50 (1.6)                        |
| Unknown                                           | 648 (9.2)                        | 415 (11.0)                       | 184 (9.1)                        | 250 (10.6)                      | 1196 (9.9)                         | 345 (11.2)                      |
| <b>History of CVD</b>                             |                                  |                                  |                                  |                                 |                                    |                                 |
| IHD                                               | 1939 (27.5)                      | 1309 (34.7)                      | 416 (20.6)                       | 735 (31.1)                      | 3014 (24.9)                        | 1098 (35.6)                     |
| Heart failure                                     | 1080 (15.3)                      | 847 (22.4)                       | 268 (13.3)                       | 469 (19.8)                      | 1709 (14.1)                        | 791 (25.7)                      |
| Hypertension                                      | 4464 (63.2)                      | 2762 (73.2)                      | 1192 (59.1)                      | 1691 (71.6)                     | 7888 (65.2)                        | 2338 (75.9)                     |
| Ischaemic stroke                                  | 990 (14.0)                       | 774 (20.5)                       | 254 (12.6)                       | 435 (18.4)                      | 1567 (13.0)                        | 553 (17.9)                      |
| <b>History of bleeding disorders</b>              |                                  |                                  |                                  |                                 |                                    |                                 |
| Intracranial bleeding                             | 96 (1.4)                         | 108 (2.9)                        | 20 (1.0)                         | 51 (2.2)                        | 139 (1.1)                          | 52 (1.7)                        |
| GI bleeding                                       | 957 (13.6)                       | 573 (15.2)                       | 232 (11.5)                       | 349 (14.8)                      | 1609 (13.3)                        | 440 (14.3)                      |
| Urogenital bleeding                               | 877 (12.4)                       | 517 (13.7)                       | 214 (10.6)                       | 309 (13.1)                      | 1629 (13.5)                        | 449 (14.6)                      |
| <b>eGFR (CKD-EPI)<br/>/min/1.73 m<sup>2</sup></b> |                                  |                                  |                                  |                                 |                                    |                                 |
| >50                                               | 5323 (75.4)                      | 1968 (52.2)                      | 1625 (80.5)                      | 1634 (69.1)                     | 9547 (79.0)                        | 1105 (35.9)                     |
| 30–50                                             | 694 (9.8)                        | 1125 (29.8)                      | 110 (5.5)                        | 464 (19.6)                      | 892 (7.4)                          | 1475 (47.9)                     |
| <30                                               | 25 (0.4)                         | 255 (6.8)                        | 4 (0.2)                          | 16 (0.7)                        | 46 (0.4)                           | 223 (7.2)                       |
| Unknown                                           | 1019 (14.4)                      | 425 (11.3)                       | 279 (13.8)                       | 249 (10.5)                      | 1606 (13.3)                        | 278 (9.0)                       |
| <b>Frailty index</b>                              |                                  |                                  |                                  |                                 |                                    |                                 |
| Fit                                               | 1306 (18.5)                      | 191 (5.1)                        | 517 (25.6)                       | 201 (8.5)                       | 2120 (17.5)                        | 133 (4.3)                       |
| Mild frailty                                      | 2839 (40.2)                      | 933 (24.7)                       | 918 (45.5)                       | 706 (29.9)                      | 4624 (38.2)                        | 668 (21.7)                      |
| Moderate frailty                                  | 1978 (28.0)                      | 1395 (37.0)                      | 448 (22.2)                       | 833 (35.3)                      | 3522 (29.1)                        | 1182 (38.4)                     |
| Severe frailty                                    | 938 (13.3)                       | 1254 (33.2)                      | 135 (6.7)                        | 623 (26.4)                      | 1825 (15.1)                        | 1098 (35.6)                     |

|                                                | <b>Apixaban (N=10,834)</b>               |                                          | <b>Dabigatran (N=4381)</b>               |                                         | <b>Rivaroxaban (N=15,252)*</b>             |                                         |
|------------------------------------------------|------------------------------------------|------------------------------------------|------------------------------------------|-----------------------------------------|--------------------------------------------|-----------------------------------------|
|                                                | <b>Standard dose<br/>(n=7061; 65.2%)</b> | <b>Reduced dose<br/>(n= 3773; 34.8%)</b> | <b>Standard dose<br/>(n=2018; 46.1%)</b> | <b>Reduced dose<br/>(n=2363; 53.9%)</b> | <b>Standard dose<br/>(n=12,091; 79.3%)</b> | <b>Reduced dose<br/>(n=3081; 20.2%)</b> |
| <b>CHA<sub>2</sub>DS<sub>2</sub>VASc score</b> |                                          |                                          |                                          |                                         |                                            |                                         |
| 0                                              | 42 (6.0)                                 | 25 (0.7)                                 | 220 (10.9)                               | 32 (1.4)                                | 608 (5.0)                                  | 23 (0.7)                                |
| 1                                              | 675 (9.6)                                | 52 (1.4)                                 | 260 (12.9)                               | 76 (3.2)                                | 1107 (9.2)                                 | 68 (2.2)                                |
| 2                                              | 1425 (20.2)                              | 252 (6.7)                                | 517 (25.6)                               | 222 (9.4)                               | 2182 (18.0)                                | 199 (6.5)                               |
| 3                                              | 1564 (22.1)                              | 623 (16.5)                               | 418 (20.7)                               | 475 (20.1)                              | 2681 (22.2)                                | 507 (16.5)                              |
| ≥4                                             | 2971 (42.1)                              | 2821 (74.8)                              | 603 (29.9)                               | 1558 (65.9)                             | 5513 (45.6)                                | 2284 (74.1)                             |
| Mean (SD)                                      | 3.2 (1.8)                                | 4.6 (1.6)                                | 2.7 (1.7)                                | 4.2 (1.7)                               | 3.4 (1.8)                                  | 4.6 (1.6)                               |
| <b>CHADS score</b>                             |                                          |                                          |                                          |                                         |                                            |                                         |
| 0                                              | 1127 (16.0)                              | 103 (2.7)                                | 480 (23.8)                               | 114 (4.8)                               | 1696 (14.0)                                | 103 (3.3)                               |
| 1                                              | 2119 (30.0)                              | 595 (15.8)                               | 681 (33.7)                               | 448 (19.0)                              | 3440 (28.5)                                | 452 (14.7)                              |
| 2                                              | 1929 (27.3)                              | 1259 (33.4)                              | 468 (23.2)                               | 786 (33.3)                              | 3596 (29.7)                                | 1044 (33.9)                             |
| ≥3                                             | 1886 (26.7)                              | 1816 (48.1)                              | 389 (19.3)                               | 1015 (43.0)                             | 3359 (27.8)                                | 1482 (48.1)                             |
| Mean (SD)                                      | 1.8 (1.3)                                | 2.6 (1.3)                                | 1.5 (1.2)                                | 1.9 (1.3)                               | 1.9 (1.3)                                  | 2.6 (1.3)                               |
| <b>HAS-BLED score</b>                          |                                          |                                          |                                          |                                         |                                            |                                         |
| 0                                              | 814 (11.5)                               | 46 (1.2)                                 | 312 (15.5)                               | 49 (2.1)                                | 1224 (10.1)                                | 54 (1.8)                                |
| 1                                              | 2437 (34.5)                              | 1163 (30.8)                              | 704 (34.9)                               | 721 (30.5)                              | 4460 (36.9)                                | 938 (30.4)                              |
| 2                                              | 2510 (35.5)                              | 1514 (40.1)                              | 699 (34.6)                               | 1005 (42.5)                             | 4467 (36.9)                                | 1305 (42.4)                             |
| 3                                              | 1089 (15.4)                              | 789 (20.9)                               | 263 (13.0)                               | 470 (19.9)                              | 1612 (13.3)                                | 596 (19.3)                              |
| ≥4                                             | 211 (3.0)                                | 261 (6.9)                                | 40 (2.0)                                 | 118 (5.0)                               | 328 (2.7)                                  | 188 (6.1)                               |
| Mean (SD)                                      | 1.6 (1.0)                                | 2.0 (1.0)                                | 1.6 (0.9)                                | 2.0 (0.9)                               | 1.6 (0.9)                                  | 2.0 (0.9)                               |
| <b>Medications<sup>†</sup></b>                 |                                          |                                          |                                          |                                         |                                            |                                         |
| Antiplatelets                                  | 3250 (46.0)                              | 1844 (48.9)                              | 993 (49.2)                               | 1285 (54.4)                             | 5299 (43.8)                                | 1519 (49.3)                             |
| Antiarrhythmics                                | 1074 (15.2)                              | 467 (12.4)                               | 403 (20.0)                               | 425 (18.0)                              | 1764 (14.6)                                | 403 (13.1)                              |
| Antihypertensives                              | 6114 (86.6)                              | 3400 (90.1)                              | 1743 (86.4)                              | 2147(90.9)                              | 10,591 (87.6)                              | 2860 (92.8)                             |

\*80 patients starting therapy on rivaroxaban were prescribed an initial daily dose higher than standard daily dose (>20 mg day) and are not included in the table. †Prescription in the year before the first NOAC prescription.

BMI, body mass index; CVD, cardiovascular disease; CKD-EPI, Chronic Kidney Disease Epidemiology; eGFR, estimated glomerular filtration; GI, gastrointestinal; IHD, ischaemic heart disease; NOACs, non-vitamin K antagonist oral anticoagulant; NVAf, non-valvular atrial fibrillation; SD, standard deviation.

**Table 2.** Prescribing of recommended daily dose of index NOAC (first NOAC prescription) by eligibility according to the EU label.

| Daily dose of index NOAC prescribed    | Dosing eligibility |               |                  |                             |
|----------------------------------------|--------------------|---------------|------------------|-----------------------------|
|                                        | Standard dose      | Reduced dose  | Contra-indicated | Total (overall eligibility) |
| <b>APIXABAN</b>                        | <b>N=9194</b>      | <b>N=1385</b> | <b>N=255</b>     | <b>N=10,834</b>             |
| Recommended                            | 6850 (74.5)        | 1260 (91.0)   | NA               | 8110 (74.9)                 |
| Lower than recommended                 | 2344 (25.5)        | 0 (0)         | NA               | 2344 (21.6)                 |
| Higher than recommended                | 0 (0)              | 125 (9.0)     | NA               | 125 (1.1)                   |
| Prescribed a NOAC when contraindicated | NA                 | NA            | 255 (100)        | 255 (2.4)                   |
| <b>DABIGATRAN</b>                      | <b>N=1790</b>      | <b>N=2357</b> | <b>N=234</b>     | <b>N=4381</b>               |
| Recommended                            | 1409 (78.7)        | 1849 (78.4)   | NA               | 3258 (74.4)                 |
| Lower than recommended                 | 381 (21.3)         | 0 (0)         | NA               | 381 (8.7)                   |
| Higher than recommended                | 0 (0)              | 508 (21.6)    | NA               | 508 (11.6)                  |
| Prescribed a NOAC when contraindicated | NA                 | NA            | 234 (100)        | 234 (5.3)                   |
| <b>RIVAROXABAN</b>                     | <b>N=12,607</b>    | <b>N=2638</b> | <b>N=7</b>       | <b>N=15,252</b>             |
| Recommended                            | 11,162 (88.5)      | 1687 (63.9)   | NA               | 12,849 (84.2)               |
| Lower than recommended                 | 1389 (11.0)        | 0 (0)         | NA               | 1389 (9.1)                  |
| Higher than recommended                | 56 (0.40)          | 951 (36.1)    | NA               | 1007 (6.6)                  |
| Prescribed a NOAC when contraindicated | NA                 | NA            | 7 (100)          | 7 (0.05)                    |

Data are n (column %).

EU, European Union; NOAC, non-vitamin K antagonist oral anticoagulants

1  
2  
3 **FIGURE LEGENDS**  
4  
5

6 **Figure 1.** Overall dose appropriateness of index NOAC daily dose (first prescribed NOAC).  
7

8  
9 NOAC, non-vitamin K antagonist oral anticoagulant.  
10

11  
12  
13 **Figure 2.** Daily dose at index prescription by degree of renal impairment\* for (A) new users of  
14 apixaban, (B) new users of dabigatran and (C) new users of rivaroxaban, in patients with NVAF  
15 and no other recent indication. *Note:* Renal function was unknown in 13.6% of the apixaban  
16 cohort, 12.3% of the dabigatran cohort and 13.0% of the rivaroxaban cohort.  
17  
18  
19  
20

21 \*Estimated using the Chronic Kidney Disease Epidemiology Collaboration equation.  
22

23  
24 eGFR, estimated glomerular filtration rate; NVAF, non-valvular atrial fibrillation  
25  
26  
27  
28  
29  
30  
31  
32  
33  
34  
35  
36  
37  
38  
39  
40  
41  
42  
43  
44  
45  
46  
47  
48  
49  
50  
51  
52  
53  
54  
55  
56  
57  
58  
59  
60



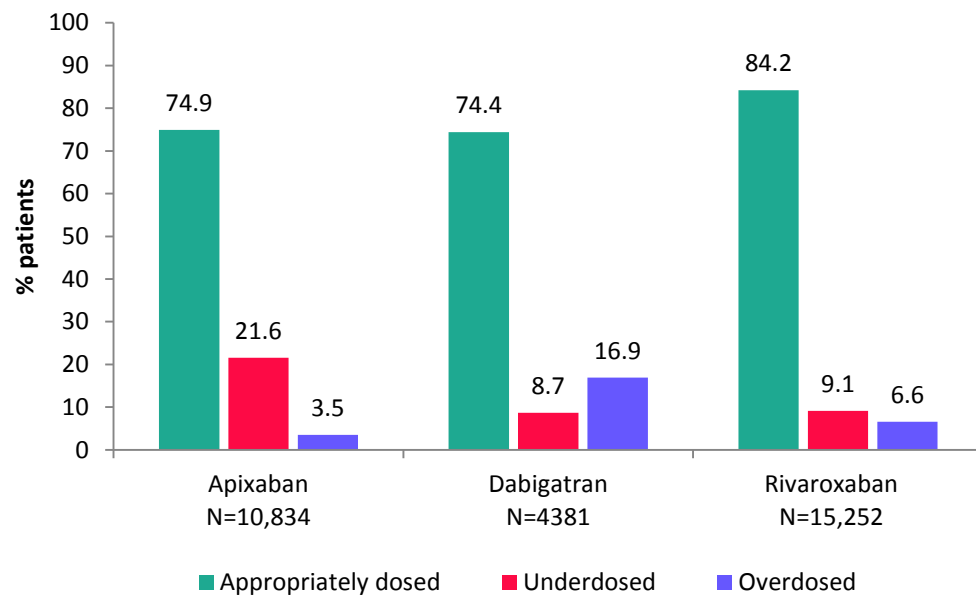

**Figure 1.** Overall dose appropriateness of index NOAC daily dose (first prescribed NOAC).

NOAC, non-vitamin K antagonist oral anticoagulant.

Note: Overdosed includes patients who received a higher dose than recommended plus patients who were contraindicated.

A. Apixaban



B. Dabigatran



C. Rivaroxaban



view only

1  
2  
3  
4  
5  
6  
7  
8  
9  
10  
11  
12  
13  
14  
15  
16  
17  
18  
19  
20  
21  
22  
23  
24  
25  
26  
27  
28  
29  
30  
31  
32  
33  
34  
35  
36  
37  
38  
39  
40  
41  
42  
43  
44  
45  
46  
47

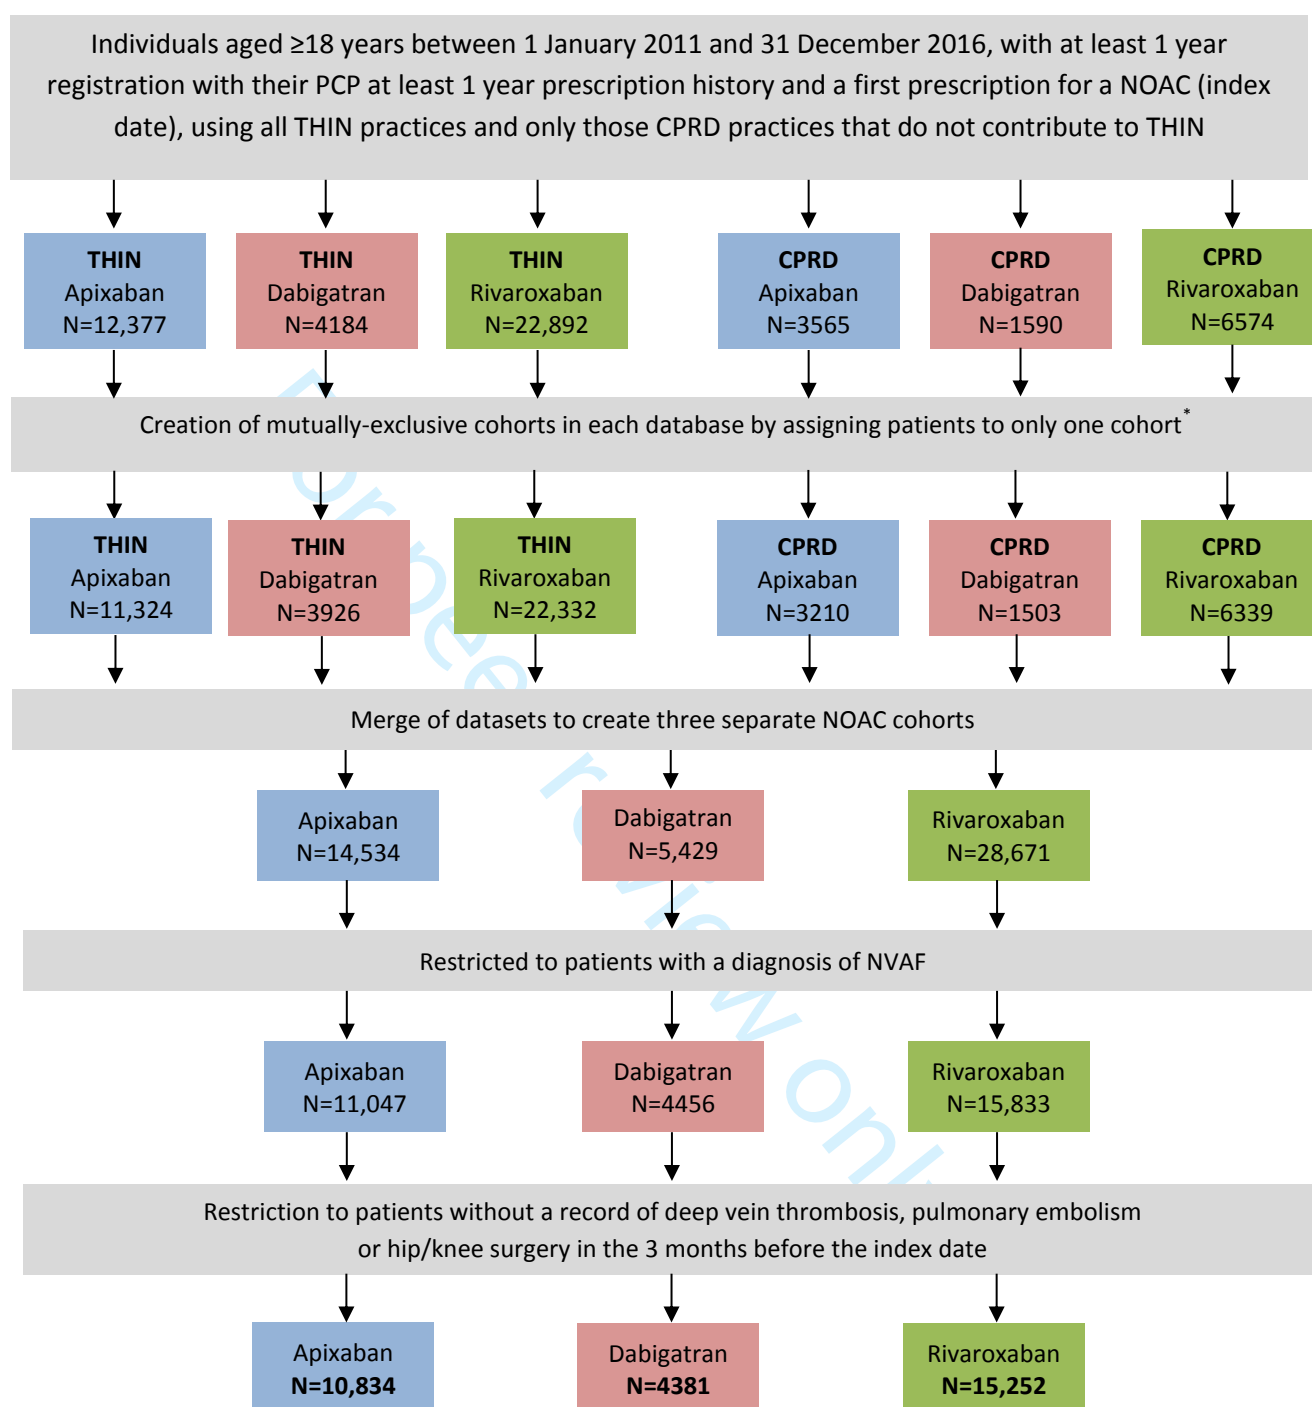

**Supplementary Figure 1.** Flowchart depicting identification of the three NOAC study cohorts from THIN and the CPRD. \*Mutually exclusive cohorts were created by excluding patients who were prescribed two different NOACs on the same day and by assigning patients to the cohort of the first prescribed NOAC.

CPRD, Clinical Practice Research Datalink; NOAC, non-vitamin K antagonist oral anticoagulant; NVAF, non-valvular atrial fibrillation; PCP, primary care practitioner; THIN, The Health Improvement Network.

1  
2  
3  
4  
5  
6  
7  
8  
9  
10  
11  
12  
13  
14  
15  
16  
17  
18  
19  
20  
21  
22  
23  
24  
25  
26  
27  
28  
29  
30  
31  
32  
33  
34  
35  
36  
37  
38  
39  
40  
41  
42  
43  
44  
45  
46  
47

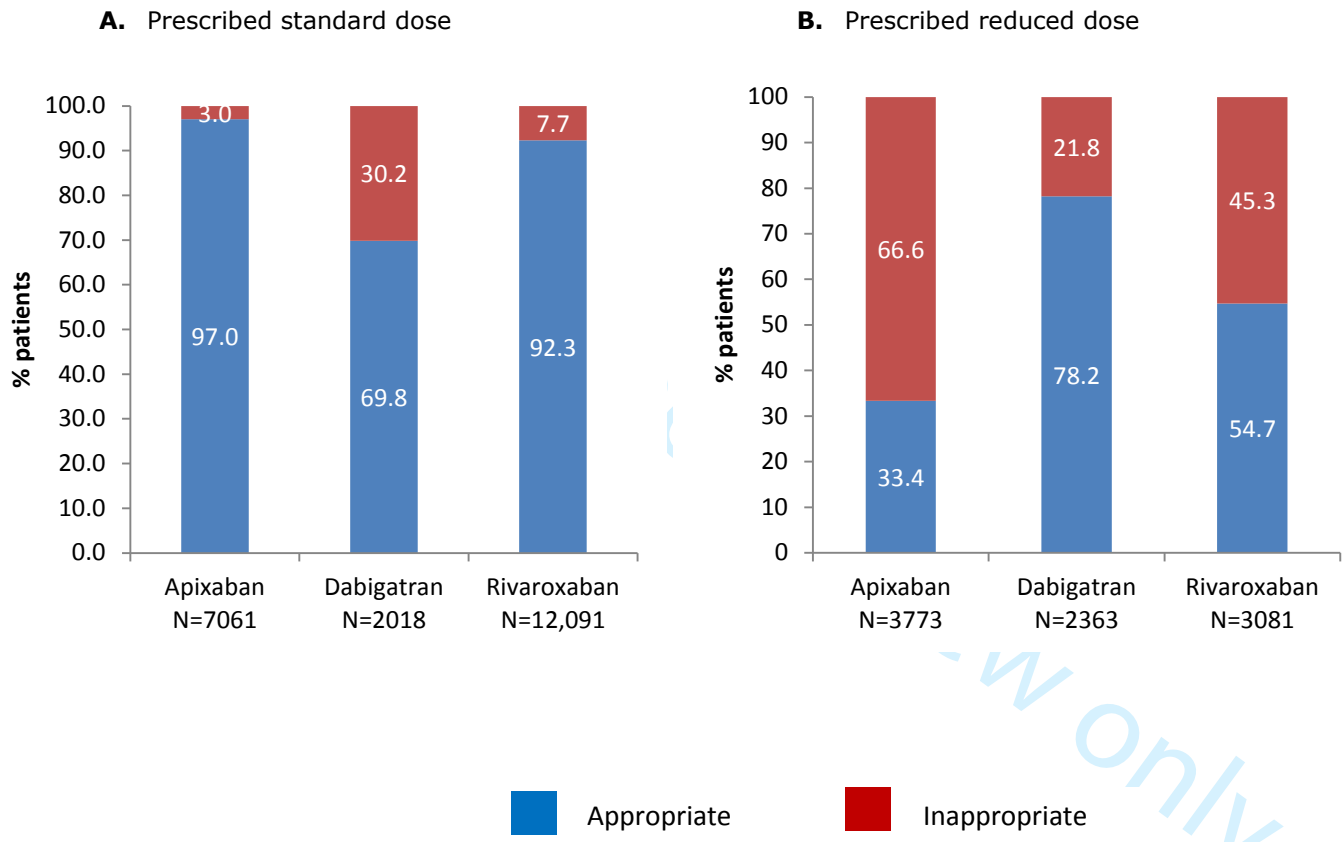

**Supplementary Figure 2:** Appropriateness of daily dose of index NOAC among patients with non-valvular atrial fibrillation who were prescribed (A) a standard dose and (B) a reduced dose. NOAC, non-vitamin K antagonist oral anticoagulant

**Supplementary Table 1.** Recommended dosing criteria and contraindications for each NOAC (for the prevention of stroke and systemic embolism in patients with NVAF) that were applied in the study.

| NOAC                                                                               | Reduced dosing criteria                                                                                                                                                                                                                                                                                                                                                                                        | Contraindications                                                                                                                                                                                                  |
|------------------------------------------------------------------------------------|----------------------------------------------------------------------------------------------------------------------------------------------------------------------------------------------------------------------------------------------------------------------------------------------------------------------------------------------------------------------------------------------------------------|--------------------------------------------------------------------------------------------------------------------------------------------------------------------------------------------------------------------|
| <b>Apixaban<sup>a</sup></b><br>standard or normal recommended daily dose = 10 mg   | 2.5 mg taken orally twice daily in patients with NVAF and $\geq 2$ of the following: <ul style="list-style-type: none"> <li>• age <math>\geq 80</math> years</li> <li>• body weight <math>\leq 60</math> kg</li> <li>• serum creatinine <math>\geq 1.5</math> mg/dL (133 micromole/L).</li> </ul> Or, severe renal impairment (CrCL 15–29 mL/min)                                                              | <i>Note:</i> In patients with CrCL $< 15$ ml/min or undergoing dialysis, there is no clinical experience therefore apixaban is not recommended.                                                                    |
| <b>Dabigatran<sup>b</sup></b><br>standard or normal recommended daily dose = 300mg | <ul style="list-style-type: none"> <li>• age <math>\geq 80</math> years</li> <li>• concomitant use of verapamil</li> </ul> Reduction for consideration when <sup>d</sup> : <ul style="list-style-type: none"> <li>• patients between 75–80 years</li> <li>• patients with moderate renal impairment (CrCL 30–50 mL/min)</li> <li>• patients with gastritis oesophagitis or gastrooesophagal reflux.</li> </ul> | <ul style="list-style-type: none"> <li>• Severe renal impairment (CrCL <math>&lt; 30</math>ml/min)</li> </ul> <i>Note:</i> Dabigatran is also not recommended in patients with hepatic impairment or liver disease |
| <b>Rivaroxaban<sup>c</sup></b><br>standard or normal recommended daily dose = 20mg | In patients with moderate/severe renal impairment (CrCL 15–49 ml/min)                                                                                                                                                                                                                                                                                                                                          | <ul style="list-style-type: none"> <li>• Severe renal impairment (creatinine clearance <math>&lt; 15</math> ml/min)</li> </ul>                                                                                     |

**Sources from which our modified criteria were obtained.**

<sup>a</sup>Eliquis. Summary of Product Characteristics.

[http://www.ema.europa.eu/docs/en\\_GB/document\\_library/EPAR\\_-\\_Product\\_Information/human/002148/WC500107728.pdf](http://www.ema.europa.eu/docs/en_GB/document_library/EPAR_-_Product_Information/human/002148/WC500107728.pdf). Accessed 7 September 2018.

<sup>b</sup>Pradaxa. Summary of Product Characteristics.

[http://www.ema.europa.eu/docs/en\\_GB/document\\_library/EPAR\\_-\\_Product\\_Information/human/000829/WC500041059.pdf](http://www.ema.europa.eu/docs/en_GB/document_library/EPAR_-_Product_Information/human/000829/WC500041059.pdf)

<sup>c</sup>Xarelto. Pradaxa. Summary of Product Characteristics.

[http://www.ema.europa.eu/docs/en\\_GB/document\\_library/EPAR\\_-\\_Product\\_Information/human/000944/WC500057108.pdf](http://www.ema.europa.eu/docs/en_GB/document_library/EPAR_-_Product_Information/human/000944/WC500057108.pdf)

<sup>d</sup>Patients meeting at least one of these criteria were considered eligible for dose reduction in our study. CrCL, creatinine clearance; NVAF, non-valvular atrial fibrillation

**Supplementary Table 2.** Frequency distribution of the daily dose of index NOAC prescription among patients with NVAF.

| Daily dose of index NOAC prescription | No. of patients | % of patients |
|---------------------------------------|-----------------|---------------|
| <b>Apixaban</b>                       | <b>10,834</b>   |               |
| 2.5 mg                                | 53              | 0.5           |
| 5 mg                                  | 3720            | 34.3          |
| 10 mg (standard)                      | 7061            | 65.2          |
| <b>Dabigatran</b>                     | <b>4381</b>     |               |
| 75–110 mg                             | 101             | 2.3           |
| 150 mg                                | 196             | 4.5           |
| 220 mg                                | 2066            | 47.2          |
| 300 mg (standard)                     | 2018            | 46.1          |
| <b>Rivaroxaban</b>                    | <b>15,252</b>   |               |
| 2.5–5 mg                              | 50              | 0.3           |
| 10 mg                                 | 340             | 2.2           |
| 15 mg                                 | 2691            | 17.6          |
| 20 mg (standard)                      | 12,091          | 79.3          |
| 30–40 mg                              | 80              | 0.5           |

NOAC, non-vitamin K antagonist oral anticoagulant

NVAF, non-valvular atrial fibrillation

**Supplementary Table 3.** Baseline characteristics of patients with NVAF newly prescribed a NOAC according to whether they were appropriately dosed or inappropriately underdosed or overdosed.

|                                        | Appropriately dosed<br>N=24,217 |      | Inappropriately underdosed<br>N=4114 |      | Overdosed<br>N=2136 |      | Total<br>N=30,467 |      |
|----------------------------------------|---------------------------------|------|--------------------------------------|------|---------------------|------|-------------------|------|
|                                        | n                               | %    | n                                    | %    | n                   | %    | n                 | %    |
| <b>Sex</b>                             |                                 |      |                                      |      |                     |      |                   |      |
| Male                                   | 13,687                          | 56.5 | 1917                                 | 46.6 | 1052                | 49.3 | 16,656            | 54.7 |
| Female                                 | 10,530                          | 43.5 | 2197                                 | 53.4 | 1084                | 50.7 | 13,811            | 45.3 |
| <b>Age (years)</b>                     |                                 |      |                                      |      |                     |      |                   |      |
| <60                                    | 2411                            | 10.0 | 175                                  | 4.3  | 68                  | 3.2  | 2654              | 8.7  |
| 60–69                                  | 5244                            | 21.7 | 455                                  | 11.1 | 218                 | 10.2 | 5917              | 19.4 |
| 70–79                                  | 8273                            | 34.2 | 1097                                 | 26.7 | 847                 | 39.7 | 10,217            | 33.5 |
| ≥80                                    | 8289                            | 34.2 | 2387                                 | 58.0 | 1003                | 47.0 | 11,679            | 38.3 |
| <b>OAC naïve status</b>                |                                 |      |                                      |      |                     |      |                   |      |
| Naïve                                  | 11,924                          | 49.2 | 2038                                 | 49.5 | 845                 | 39.6 | 14,807            | 48.6 |
| Non-naïve                              | 12,293                          | 50.8 | 2076                                 | 50.5 | 1291                | 60.4 | 15,660            | 51.4 |
| <b>Year of first NOAC prescription</b> |                                 |      |                                      |      |                     |      |                   |      |
| 2011–2013                              | 3413                            | 14.1 | 513                                  | 12.5 | 527                 | 24.7 | 4453              | 14.6 |
| 2014–2016                              | 20,804                          | 85.9 | 3601                                 | 87.5 | 1609                | 75.3 | 26,014            | 85.4 |
| <b>BMI, kg/m<sup>2</sup></b>           |                                 |      |                                      |      |                     |      |                   |      |
| <20 (underweight)                      | 5553                            | 22.9 | 1047                                 | 25.4 | 502                 | 23.5 | 7102              | 23.3 |
| 20–24 (healthy weight)                 | 989                             | 4.1  | 201                                  | 4.9  | 79                  | 3.7  | 1269              | 4.2  |
| 25–29 (overweight)                     | 8456                            | 34.9 | 1530                                 | 37.2 | 739                 | 34.6 | 10,725            | 35.2 |
| ≥30 (obese)                            | 8296                            | 34.3 | 1134                                 | 27.6 | 739                 | 34.6 | 10,169            | 33.4 |
| Missing                                | 923                             | 3.8  | 202                                  | 4.9  | 77                  | 3.6  | 1202              | 3.9  |
| <b>Smoking</b>                         |                                 |      |                                      |      |                     |      |                   |      |
| Non-smoker                             | 9904                            | 40.9 | 1770                                 | 43.0 | 852                 | 39.9 | 12,526            | 41.1 |
| Smoker                                 | 1933                            | 8.0  | 273                                  | 6.6  | 131                 | 6.1  | 2337              | 7.7  |
| Ex-smoker                              | 12,359                          | 51.0 | 2068                                 | 50.3 | 1151                | 53.9 | 15,578            | 51.1 |
| Unknown                                | 21                              | 0.1  | 3                                    | 0.1  | 2                   | 0.1  | 26                | 0.1  |
| <b>Alcohol (units/week)</b>            |                                 |      |                                      |      |                     |      |                   |      |
| None                                   | 4780                            | 19.7 | 1042                                 | 25.3 | 526                 | 24.6 | 6348              | 20.8 |
| 1–9                                    | 10,870                          | 44.9 | 1827                                 | 44.4 | 978                 | 45.8 | 13,675            | 44.9 |
| 10–20                                  | 3968                            | 16.4 | 517                                  | 12.6 | 260                 | 12.2 | 4745              | 15.6 |
| 21–41                                  | 1541                            | 6.4  | 180                                  | 4.4  | 115                 | 5.4  | 1836              | 6.0  |
| ≥42                                    | 674                             | 2.8  | 88                                   | 2.1  | 55                  | 2.6  | 817               | 2.7  |
| Unknown                                | 2384                            | 9.8  | 460                                  | 11.2 | 202                 | 9.5  | 3046              | 10.0 |
| <b>CVD</b>                             |                                 |      |                                      |      |                     |      |                   |      |
| IHD                                    |                                 |      |                                      |      |                     |      |                   |      |
| Heart failure                          | 3853                            | 15.9 | 780                                  | 19.0 | 549                 | 25.7 | 5182              | 17.0 |
| Hypertension                           | 15,920                          | 65.7 | 2857                                 | 69.4 | 1617                | 75.7 | 20,394            | 66.9 |
| Ischaemic stroke                       | 3445                            | 14.2 | 754                                  | 18.3 | 388                 | 18.2 | 4587              | 15.1 |

|                                                             | Appropriately dosed<br>N=24,217 |      | Inappropriately underdosed<br>N=4114 |      | Overdosed<br>N=2136 |      | Total<br>N=30,467 |      |
|-------------------------------------------------------------|---------------------------------|------|--------------------------------------|------|---------------------|------|-------------------|------|
| <b>History of bleeding (GI, intracranial or urogenital)</b> | 6037                            | 24.9 | 1135                                 | 27.6 | 609                 | 28.5 | 7781              | 25.5 |
| <b>eGFR, ml/min/1.73m<sup>2</sup></b>                       |                                 |      |                                      |      |                     |      |                   |      |
| >50                                                         | 17,707                          | 73.1 | 2863                                 | 69.6 | 679                 | 31.8 | 21,249            | 69.7 |
| 30–50                                                       | 3017                            | 12.5 | 590                                  | 14.3 | 1175                | 55.0 | 4782              | 15.7 |
| <30                                                         | 385                             | 1.6  | 0                                    | 0.0  | 186                 | 8.7  | 571               | 1.9  |
| Missing                                                     | 3108                            | 12.8 | 661                                  | 16.1 | 96                  | 4.5  | 3865              | 12.7 |
| <b>Frailty index</b>                                        |                                 |      |                                      |      |                     |      |                   |      |
| Fit                                                         | 4005                            | 16.5 | 372                                  | 9.0  | 103                 | 4.8  | 4480              | 14.7 |
| Mild frailty                                                | 8912                            | 36.8 | 1218                                 | 29.6 | 579                 | 27.1 | 10,709            | 35.1 |
| Moderate frailty                                            | 7140                            | 29.5 | 1478                                 | 35.9 | 754                 | 35.3 | 9372              | 30.8 |
| Severe frailty                                              | 4160                            | 17.2 | 1046                                 | 25.4 | 700                 | 32.8 | 5906              | 19.4 |
| <b>CHA<sub>2</sub>DS<sub>2</sub>-VASc score</b>             |                                 |      |                                      |      |                     |      |                   |      |
| ≤2                                                          | 7436                            | 30.7 | 703                                  | 17.1 | 246                 | 11.5 | 8385              | 27.5 |
| 3                                                           | 5095                            | 21.0 | 803                                  | 19.5 | 384                 | 18.0 | 6282              | 20.6 |
| ≥4                                                          | 11,686                          | 48.3 | 2608                                 | 63.4 | 1506                | 70.5 | 15,800            | 51.9 |
| <b>HAS-BLED score</b>                                       |                                 |      |                                      |      |                     |      |                   |      |
| 0                                                           | 10,841                          | 44.8 | 1529                                 | 37.2 | 588                 | 27.5 | 12,958            | 42.5 |
| 1–2                                                         | 8962                            | 37.0 | 1676                                 | 40.7 | 885                 | 41.4 | 11,523            | 37.8 |
| ≥3                                                          | 4414                            | 18.2 | 909                                  | 22.1 | 663                 | 31.0 | 5986              | 19.6 |

BMI, body mass index; CVD, cardiovascular disease; eGFR, estimated glomerular filtration rate; GI, gastrointestinal; OAC, oral anticoagulant; NOAC, non-vitamin K oral anticoagulant; NVAf, non-valvular atrial fibrillation; SD, standard deviation



**Supplementary Table 4a.** Appropriateness of the dose of the first NOAC prescription according to the EU drug label among patients with NVAF, stratified by previous use of an oral anticoagulant (naïve/non-naïve).

| ALL NOACs          | Naïve patients<br>N=14,807 (48.6%) |      | Non-naïve<br>N=15,660 (51.4%) |      | Total<br>N=30,467 |      |
|--------------------|------------------------------------|------|-------------------------------|------|-------------------|------|
|                    | n                                  | %    | n                             | %    | n                 | %    |
| Appropriate dose   | 11,924                             | 80.5 | 12,293                        | 78.5 | 24,217            | 79.5 |
| Inappropriate dose | 2883                               | 19.5 | 3367                          | 21.5 | 6250              | 20.5 |

EU, European Union; NOAC, non-vitamin K antagonist oral anticoagulant; NVAF, non-valvular atrial fibrillation

**Supplementary Table 4b.** Appropriateness of the dose of the first apixaban prescription according to the EU drug label among patients with NVAF, stratified by previous use of an oral anticoagulant (naïve/non-naïve).

| Apixaban           | Naïve patients<br>N=5774 (53.3%) |      | Non-naïve<br>N=5060 (46.7%) |      | Total<br>N=10,834 |      |
|--------------------|----------------------------------|------|-----------------------------|------|-------------------|------|
|                    | n                                | %    | n                           | %    | n                 | %    |
| Appropriate dose   | 4405                             | 76.3 | 3705                        | 73.2 | 8110              | 74.9 |
| Inappropriate dose | 1369                             | 23.7 | 1355                        | 26.8 | 2724              | 25.1 |

EU, European Union; NOAC, non-vitamin K antagonist oral anticoagulant; NVAF, non-valvular atrial fibrillation

**Supplementary Table 4c.** Appropriateness of the dose of the first dabigatran prescription according to the EU drug label among patients with NVAF, stratified by previous use of an oral anticoagulant (naïve/non-naïve).

| Dabigatran         | Naïve patients<br>N=1827 (41.7%) |      | Non-naïve<br>N=2554 (58.3%) |      | Total<br>N=4381 |      |
|--------------------|----------------------------------|------|-----------------------------|------|-----------------|------|
|                    | n                                | %    | n                           | %    | n               | %    |
| Appropriate dose   | 1383                             | 75.7 | 1875                        | 73.4 | 3258            | 74.4 |
| Inappropriate dose | 444                              | 24.3 | 679                         | 26.6 | 1123            | 25.6 |

EU, European Union; NOAC, non-vitamin K antagonist oral anticoagulant; NVAF, non-valvular atrial fibrillation

**Supplementary Table 4d.** Appropriateness of the dose of the first rivaroxaban prescription according to the EU drug label among patients with NVAF, stratified by previous use of an oral anticoagulant (naïve/non-naïve).

| Rivaroxaban        | Naïve patients<br>N=7206 (47.2%) |      | Non-naïve<br>N=8046 (52.8%) |      | Total<br>N=15,252 |      |
|--------------------|----------------------------------|------|-----------------------------|------|-------------------|------|
|                    | n                                | %    | n                           | %    | n                 | %    |
| Appropriate dose   | 6136                             | 85.2 | 6713                        | 83.4 | 12849             | 84.2 |
| Inappropriate dose | 1070                             | 14.8 | 1333                        | 16.6 | 2403              | 15.8 |

EU, European Union; NOAC, non-vitamin K antagonist oral anticoagulant; NVAF, non-valvular atrial fibrillation

**Supplementary Table 5.** Daily dose of NOAC 6 months after the index date among patients with NVAF with at least 6 months' follow-up and still using a NOAC at 6 months.

|                               | Lower dose than the index NOAC prescription |     | Same dose than the index NOAC prescription |      | Higher dose than the index NOAC prescription |     | Patients with at least 6 months' follow-up and who were still prescribed a NOAC at 6 months | Total patients with NVAF in the study |
|-------------------------------|---------------------------------------------|-----|--------------------------------------------|------|----------------------------------------------|-----|---------------------------------------------------------------------------------------------|---------------------------------------|
|                               | n                                           | %   | n                                          | %    | n                                            | %   |                                                                                             |                                       |
| <b>Apixaban (N=6783)</b>      | 129                                         | 1.9 | 6362                                       | 95.4 | 201                                          | 3.0 | <b>6667</b>                                                                                 | <b>10,834</b>                         |
| <b>Dabigatran (N=2874)</b>    | 72                                          | 2.5 | 2648                                       | 93.7 | 107                                          | 3.8 | <b>2827</b>                                                                                 | <b>4381</b>                           |
| <b>Rivaroxaban (N=10,068)</b> | 325                                         | 3.3 | 9265                                       | 95.0 | 160                                          | 1.6 | <b>9750</b>                                                                                 | <b>15,252</b>                         |
|                               |                                             |     |                                            |      |                                              |     | <b>19,244</b>                                                                               | <b>30,467</b>                         |

NOAC, non-vitamin K antagonist oral anticoagulant, NVAF, non-valvular atrial fibrillation

**Supplementary Table 6.** Dose of the index NOAC prescription among patients with and without a NOAC prescription at 6 months.

| <b>Index NOAC</b>  | <b>Patients with at least 6 months of follow-up and still prescribed a NOAC at 6 months</b> |          | <b>Patients not prescribed a NOAC at 6 months (i.e. remaining patients)</b> |          | <b>TOTAL</b>    |          |
|--------------------|---------------------------------------------------------------------------------------------|----------|-----------------------------------------------------------------------------|----------|-----------------|----------|
| <b>Apixaban</b>    | <b>N=6667</b>                                                                               |          | <b>N=4167</b>                                                               |          | <b>N=10,834</b> |          |
|                    | <b>n</b>                                                                                    | <b>%</b> | <b>n</b>                                                                    | <b>%</b> | <b>n</b>        | <b>%</b> |
| 5 mg               | 2258                                                                                        | 33.9     | 1515                                                                        | 36.4     | 3773            | 34.8     |
| 10 mg              | 4409                                                                                        | 66.1     | 2652                                                                        | 63.6     | 7061            | 65.2     |
| <b>Dabigatran</b>  | <b>N=2827</b>                                                                               |          | <b>N=1554</b>                                                               |          | <b>N=4381</b>   |          |
|                    | <b>n</b>                                                                                    | <b>%</b> | <b>n</b>                                                                    | <b>%</b> | <b>n</b>        | <b>%</b> |
| 110 mg             | 63                                                                                          | 2.2      | 38                                                                          | 2.4      | 101             | 2.3      |
| 150 mg             | 131                                                                                         | 4.6      | 65                                                                          | 4.2      | 196             | 4.5      |
| 220 mg             | 1290                                                                                        | 45.6     | 776                                                                         | 49.9     | 2066            | 47.2     |
| 300 mg             | 1343                                                                                        | 47.5     | 675                                                                         | 43.4     | 2018            | 46.1     |
| <b>Rivaroxaban</b> | <b>N=9750</b>                                                                               |          | <b>N=5502</b>                                                               |          | <b>N=15,252</b> |          |
|                    | <b>n</b>                                                                                    | <b>%</b> | <b>n</b>                                                                    | <b>%</b> | <b>n</b>        | <b>%</b> |
| 10 mg              | 246                                                                                         | 2.5      | 144                                                                         | 2.6      | 390             | 2.6      |
| 15 mg              | 1648                                                                                        | 16.9     | 1043                                                                        | 19.0     | 2691            | 17.6     |
| 20 mg              | 7819                                                                                        | 80.2     | 4272                                                                        | 77.6     | 12,091          | 79.3     |
| ≥30 mg             | 37                                                                                          | 0.3      | 43                                                                          | 0.8      | 80              | 0.5      |

NOAC, non-vitamin K antagonist oral anticoagulant

**STROBE Statement—Checklist of items that should be included in reports of cross-sectional studies**

|                              | <b>Item No</b> | <b>Recommendation</b>                                                                                                                                                                             | <b>Page No</b>                         |
|------------------------------|----------------|---------------------------------------------------------------------------------------------------------------------------------------------------------------------------------------------------|----------------------------------------|
| <b>Title and abstract</b>    | 1              | (a) Indicate the study's design with a commonly used term in the title or the abstract                                                                                                            | 1 and 2                                |
|                              |                | (b) Provide in the abstract an informative and balanced summary of what was done and what was found                                                                                               | 2 and 3                                |
| <b>Introduction</b>          |                |                                                                                                                                                                                                   |                                        |
| Background/rationale         | 2              | Explain the scientific background and rationale for the investigation being reported                                                                                                              | 5                                      |
| Objectives                   | 3              | State specific objectives, including any prespecified hypotheses                                                                                                                                  | 5                                      |
| <b>Methods</b>               |                |                                                                                                                                                                                                   |                                        |
| Study design                 | 4              | Present key elements of study design early in the paper                                                                                                                                           | 5 and 6                                |
| Setting                      | 5              | Describe the setting, locations, and relevant dates, including periods of recruitment, exposure, follow-up, and data collection                                                                   | 6 to 8                                 |
| Participants                 | 6              | (a) Give the eligibility criteria, and the sources and methods of selection of participants                                                                                                       | 6 to 8                                 |
| Variables                    | 7              | Clearly define all outcomes, exposures, predictors, potential confounders, and effect modifiers. Give diagnostic criteria, if applicable                                                          | 8 to 9                                 |
| Data sources/<br>measurement | 8*             | For each variable of interest, give sources of data and details of methods of assessment (measurement). Describe comparability of assessment methods if there is more than one group              | 7 to 8                                 |
| Bias                         | 9              | Describe any efforts to address potential sources of bias                                                                                                                                         | 6                                      |
| Study size                   | 10             | Explain how the study size was arrived at                                                                                                                                                         | 6                                      |
| Quantitative<br>variables    | 11             | Explain how quantitative variables were handled in the analyses. If applicable, describe which groupings were chosen and why                                                                      | 9                                      |
| Statistical methods          | 12             | (a) Describe all statistical methods, including those used to control for confounding                                                                                                             | 9                                      |
|                              |                | (b) Describe any methods used to examine subgroups and interactions                                                                                                                               |                                        |
|                              |                | (c) Explain how missing data were addressed                                                                                                                                                       |                                        |
|                              |                | (d) If applicable, describe analytical methods taking account of sampling strategy                                                                                                                |                                        |
|                              |                | (e) Describe any sensitivity analyses                                                                                                                                                             |                                        |
| <b>Results</b>               |                |                                                                                                                                                                                                   |                                        |
| Participants                 | 13*            | (a) Report numbers of individuals at each stage of study—eg numbers potentially eligible, examined for eligibility, confirmed eligible, included in the study, completing follow-up, and analysed | 9 and Suppl Fig 1                      |
|                              |                | (b) Give reasons for non-participation at each stage                                                                                                                                              |                                        |
|                              |                | (c) Consider use of a flow diagram                                                                                                                                                                | Suppl Fig 1                            |
| Descriptive data             | 14*            | (a) Give characteristics of study participants (eg demographic, clinical, social) and information on exposures and potential confounders                                                          | 10 and Table 1                         |
|                              |                | (b) Indicate number of participants with missing data for each variable of interest                                                                                                               | Table 1                                |
| Outcome data                 | 15*            | Report numbers of outcome events or summary measures                                                                                                                                              | 10 to 13, Fig 1, Fig 2 and Suppl Fig 2 |

|    |                          |    |                                                                                                                                                                                                              |
|----|--------------------------|----|--------------------------------------------------------------------------------------------------------------------------------------------------------------------------------------------------------------|
| 1  |                          |    |                                                                                                                                                                                                              |
| 2  | Main results             | 16 | (a) Give unadjusted estimates and, if applicable, confounder-adjusted estimates and their precision (eg, 95% confidence interval). Make clear which confounders were adjusted for and why they were included |
| 3  |                          |    |                                                                                                                                                                                                              |
| 4  |                          |    | (b) Report category boundaries when continuous variables were categorized                                                                                                                                    |
| 5  |                          |    |                                                                                                                                                                                                              |
| 6  |                          |    | (c) If relevant, consider translating estimates of relative risk into absolute risk for a meaningful time period                                                                                             |
| 7  |                          |    |                                                                                                                                                                                                              |
| 8  |                          |    |                                                                                                                                                                                                              |
| 9  |                          |    |                                                                                                                                                                                                              |
| 10 |                          |    |                                                                                                                                                                                                              |
| 11 | Other analyses           | 17 | Report other analyses done—eg analyses of subgroups and interactions, and sensitivity analyses                                                                                                               |
| 12 |                          |    |                                                                                                                                                                                                              |
| 13 |                          |    |                                                                                                                                                                                                              |
| 14 | <b>Discussion</b>        |    |                                                                                                                                                                                                              |
| 15 | Key results              | 18 | Summarise key results with reference to study objectives                                                                                                                                                     |
| 16 | Limitations              | 19 | Discuss limitations of the study, taking into account sources of potential bias or imprecision. Discuss both direction and magnitude of any potential bias                                                   |
| 17 |                          |    |                                                                                                                                                                                                              |
| 18 |                          |    |                                                                                                                                                                                                              |
| 19 |                          |    |                                                                                                                                                                                                              |
| 20 | Interpretation           | 20 | Give a cautious overall interpretation of results considering objectives, limitations, multiplicity of analyses, results from similar studies, and other relevant evidence                                   |
| 21 |                          |    |                                                                                                                                                                                                              |
| 22 |                          |    |                                                                                                                                                                                                              |
| 23 |                          |    |                                                                                                                                                                                                              |
| 24 | Generalisability         | 21 | Discuss the generalisability (external validity) of the study results                                                                                                                                        |
| 25 |                          |    |                                                                                                                                                                                                              |
| 26 | <b>Other information</b> |    |                                                                                                                                                                                                              |
| 27 | Funding                  | 22 | Give the source of funding and the role of the funders for the present study and, if applicable, for the original study on which the present article is based                                                |
| 28 |                          |    |                                                                                                                                                                                                              |
| 29 |                          |    |                                                                                                                                                                                                              |
| 30 |                          |    |                                                                                                                                                                                                              |

\*Give information separately for exposed and unexposed groups.

**Note:** An Explanation and Elaboration article discusses each checklist item and gives methodological background and published examples of transparent reporting. The STROBE checklist is best used in conjunction with this article (freely available on the Web sites of PLoS Medicine at <http://www.plosmedicine.org/>, Annals of Internal Medicine at <http://www.annals.org/>, and Epidemiology at <http://www.epidem.com/>). Information on the STROBE Initiative is available at [www.strobe-statement.org](http://www.strobe-statement.org).
