# Supplementary material for: Appropriateness of initial dose of non-vitamin K antagonist oral anticoagulants in patients with non-valvular atrial fibrillation in the UK
Source: PubMed Central journal article supplement — BMJ Open. 2019 Sep 20;9(9):e031341. doi: 10.1136/bmjopen-2019-031341 (PMC6756330; doi:10.1136/bmjopen-2019-031341), 2019-09-20
Supplement: bmjopen-2019-031341supp001.pdf [file bmjopen-2019-031341supp001.pdf]

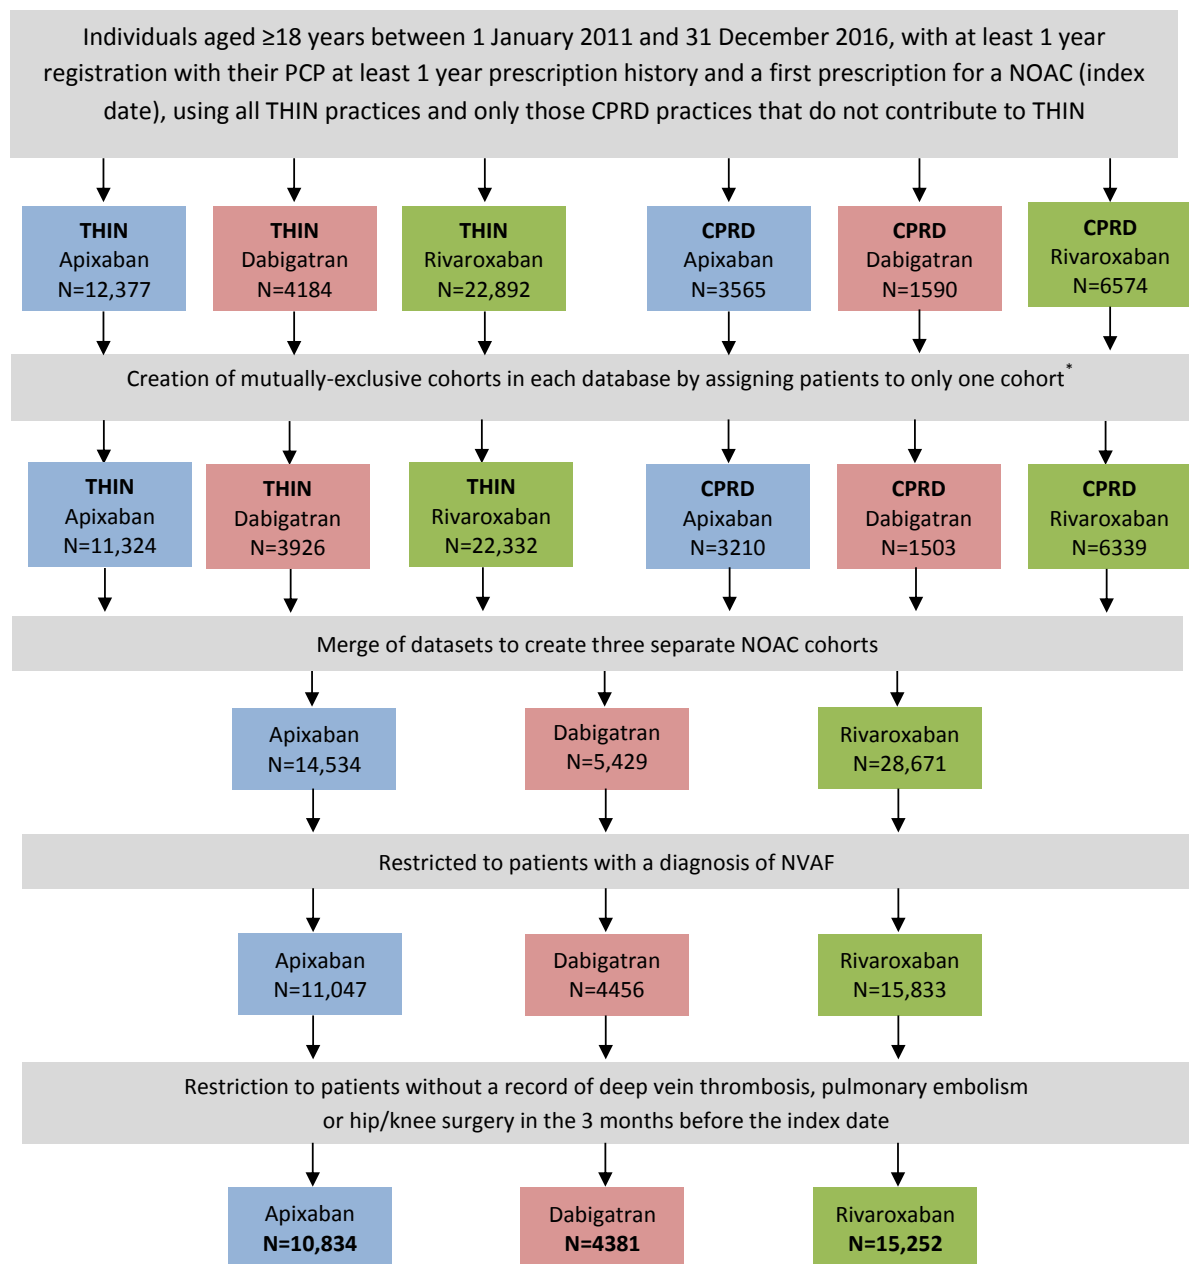

**Supplementary Figure 1.** Flowchart depicting identification of the three NOAC study cohorts from THIN and the CPRD. \*Mutually exclusive cohorts were created by excluding patients who were prescribed two different NOACs on the same day and by assigning patients to the cohort of the first prescribed NOAC.

CPRD, Clinical Practice Research Datalink; NOAC, non-vitamin K antagonist oral anticoagulant; NVAF, non-valvular atrial fibrillation; PCP, primary care practitioner; THIN, The Health Improvement Network.
