# Supplementary material for: Appropriateness of initial dose of non-vitamin K antagonist oral anticoagulants in patients with non-valvular atrial fibrillation in the UK
Source: PubMed Central journal article supplement — BMJ Open. 2019 Sep 20;9(9):e031341. doi: 10.1136/bmjopen-2019-031341 (PMC6756330; doi:10.1136/bmjopen-2019-031341), 2019-09-20
Supplement: bmjopen-2019-031341supp002.pdf [file bmjopen-2019-031341supp002.pdf]

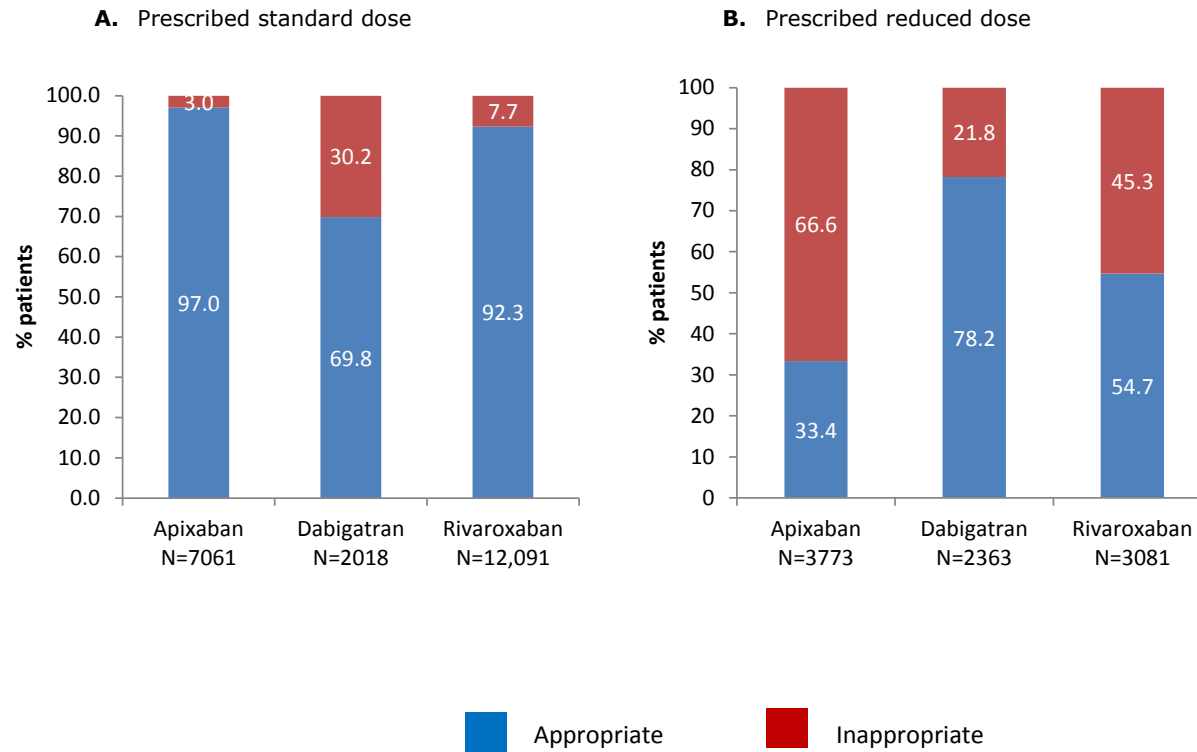

**Supplementary Figure 2:** Appropriateness of daily dose of index NOAC among patients with non-valvular atrial fibrillation who were prescribed (A) a standard dose and (B) a reduced dose.  
NOAC, non-vitamin K antagonist oral anticoagulant
