# Supplementary material for: Appropriateness of initial dose of non-vitamin K antagonist oral anticoagulants in patients with non-valvular atrial fibrillation in the UK
Source: PubMed Central journal article supplement — BMJ Open. 2019 Sep 20;9(9):e031341. doi: 10.1136/bmjopen-2019-031341 (PMC6756330; doi:10.1136/bmjopen-2019-031341), 2019-09-20
Supplement: bmjopen-2019-031341supp003.pdf [file bmjopen-2019-031341supp003.pdf]

**Supplementary Table 1.** Recommended dosing criteria and contraindications for each NOAC (for the prevention of stroke and systemic embolism in patients with NVAf) that were applied in the study.

| NOAC                                                                               | Reduced dosing criteria                                                                                                                                                                                                                                                                                                                                                                                        | Contraindications                                                                                                                                                                                                  |
|------------------------------------------------------------------------------------|----------------------------------------------------------------------------------------------------------------------------------------------------------------------------------------------------------------------------------------------------------------------------------------------------------------------------------------------------------------------------------------------------------------|--------------------------------------------------------------------------------------------------------------------------------------------------------------------------------------------------------------------|
| <b>Apixaban<sup>a</sup></b><br>standard or normal recommended daily dose = 10 mg   | 2.5 mg taken orally twice daily in patients with NVAf and $\geq 2$ of the following: <ul style="list-style-type: none"> <li>• age <math>\geq 80</math> years</li> <li>• body weight <math>\leq 60</math> kg</li> <li>• serum creatinine <math>\geq 1.5</math> mg/dL (133 micromole/L).</li> </ul> Or, severe renal impairment (CrCL 15–29 mL/min)                                                              | <i>Note:</i> In patients with CrCL $< 15$ ml/min or undergoing dialysis, there is no clinical experience therefore apixaban is not recommended.                                                                    |
| <b>Dabigatran<sup>b</sup></b><br>standard or normal recommended daily dose = 300mg | <ul style="list-style-type: none"> <li>• age <math>\geq 80</math> years</li> <li>• concomitant use of verapamil</li> </ul> Reduction for consideration when <sup>d</sup> : <ul style="list-style-type: none"> <li>• patients between 75–80 years</li> <li>• patients with moderate renal impairment (CrCL 30–50 mL/min)</li> <li>• patients with gastritis oesophagitis or gastrooesophagal reflux.</li> </ul> | <ul style="list-style-type: none"> <li>• Severe renal impairment (CrCL <math>&lt; 30</math>ml/min)</li> </ul> <i>Note:</i> Dabigatran is also not recommended in patients with hepatic impairment or liver disease |
| <b>Rivaroxaban<sup>c</sup></b><br>standard or normal recommended daily dose = 20mg | In patients with moderate/severe renal impairment (CrCL 15–49 ml/min)                                                                                                                                                                                                                                                                                                                                          | <ul style="list-style-type: none"> <li>• Severe renal impairment (creatinine clearance <math>&lt; 15</math> ml/min)</li> </ul>                                                                                     |

**Sources from which our modified criteria were obtained.**

<sup>a</sup>Eliquis. Summary of Product Characteristics.

[http://www.ema.europa.eu/docs/en\\_GB/document\\_library/EPAR\\_-\\_Product\\_Information/human/002148/WC500107728.pdf](http://www.ema.europa.eu/docs/en_GB/document_library/EPAR_-_Product_Information/human/002148/WC500107728.pdf). Accessed 7 September 2018.

<sup>b</sup>Pradaxa. Summary of Product Characteristics.

[http://www.ema.europa.eu/docs/en\\_GB/document\\_library/EPAR\\_-\\_Product\\_Information/human/000829/WC500041059.pdf](http://www.ema.europa.eu/docs/en_GB/document_library/EPAR_-_Product_Information/human/000829/WC500041059.pdf)

<sup>c</sup>Xarelto. Pradaxa. Summary of Product Characteristics.

[http://www.ema.europa.eu/docs/en\\_GB/document\\_library/EPAR\\_-\\_Product\\_Information/human/000944/WC500057108.pdf](http://www.ema.europa.eu/docs/en_GB/document_library/EPAR_-_Product_Information/human/000944/WC500057108.pdf)

<sup>d</sup>Patients meeting at least one of these criteria were considered eligible for dose reduction in our study.

CrCL, creatinine clearance; NVAf, non-valvular atrial fibrillation
