# Supplementary material for: Appropriateness of initial dose of non-vitamin K antagonist oral anticoagulants in patients with non-valvular atrial fibrillation in the UK
Source: PubMed Central journal article supplement — BMJ Open. 2019 Sep 20;9(9):e031341. doi: 10.1136/bmjopen-2019-031341 (PMC6756330; doi:10.1136/bmjopen-2019-031341), 2019-09-20
Supplement: bmjopen-2019-031341supp004.pdf [file bmjopen-2019-031341supp004.pdf]

**Supplementary Table 2.** Frequency distribution of the daily dose of index NOAC prescription among patients with NVAF.

| Daily dose of index NOAC prescription | No. of patients | % of patients |
|---------------------------------------|-----------------|---------------|
| <b>Apixaban</b>                       | <b>10,834</b>   |               |
| 2.5 mg                                | 53              | 0.5           |
| 5 mg                                  | 3720            | 34.3          |
| 10 mg (standard)                      | 7061            | 65.2          |
| <b>Dabigatran</b>                     | <b>4381</b>     |               |
| 75–110 mg                             | 101             | 2.3           |
| 150 mg                                | 196             | 4.5           |
| 220 mg                                | 2066            | 47.2          |
| 300 mg (standard)                     | 2018            | 46.1          |
| <b>Rivaroxaban</b>                    | <b>15,252</b>   |               |
| 2.5–5 mg                              | 50              | 0.3           |
| 10 mg                                 | 340             | 2.2           |
| 15 mg                                 | 2691            | 17.6          |
| 20 mg (standard)                      | 12,091          | 79.3          |
| 30–40 mg                              | 80              | 0.5           |

NOAC, non-vitamin K antagonist oral anticoagulant

NVAF, non-valvular atrial fibrillation
