# Supplementary material for: Appropriateness of initial dose of non-vitamin K antagonist oral anticoagulants in patients with non-valvular atrial fibrillation in the UK
Source: PubMed Central journal article supplement — BMJ Open. 2019 Sep 20;9(9):e031341. doi: 10.1136/bmjopen-2019-031341 (PMC6756330; doi:10.1136/bmjopen-2019-031341), 2019-09-20
Supplement: bmjopen-2019-031341supp005.pdf [file bmjopen-2019-031341supp005.pdf]

**Supplementary Table 3.** Baseline characteristics of patients with NVAf newly prescribed a NOAC according to whether they were appropriately dosed or inappropriately underdosed or overdosed.

|                                        | Appropriately dosed<br>N=24,217 |      | Inappropriately underdosed<br>N=4114 |      | Overdosed<br>N=2136 |      | Total<br>N=30,467 |      |
|----------------------------------------|---------------------------------|------|--------------------------------------|------|---------------------|------|-------------------|------|
|                                        | n                               | %    | n                                    | %    | n                   | %    | n                 | %    |
| <b>Sex</b>                             |                                 |      |                                      |      |                     |      |                   |      |
| Male                                   | 13,687                          | 56.5 | 1917                                 | 46.6 | 1052                | 49.3 | 16,656            | 54.7 |
| Female                                 | 10,530                          | 43.5 | 2197                                 | 53.4 | 1084                | 50.7 | 13,811            | 45.3 |
| <b>Age (years)</b>                     |                                 |      |                                      |      |                     |      |                   |      |
| <60                                    | 2411                            | 10.0 | 175                                  | 4.3  | 68                  | 3.2  | 2654              | 8.7  |
| 60–69                                  | 5244                            | 21.7 | 455                                  | 11.1 | 218                 | 10.2 | 5917              | 19.4 |
| 70–79                                  | 8273                            | 34.2 | 1097                                 | 26.7 | 847                 | 39.7 | 10,217            | 33.5 |
| ≥80                                    | 8289                            | 34.2 | 2387                                 | 58.0 | 1003                | 47.0 | 11,679            | 38.3 |
| <b>OAC naïve status</b>                |                                 |      |                                      |      |                     |      |                   |      |
| Naïve                                  | 11,924                          | 49.2 | 2038                                 | 49.5 | 845                 | 39.6 | 14,807            | 48.6 |
| Non-naïve                              | 12,293                          | 50.8 | 2076                                 | 50.5 | 1291                | 60.4 | 15,660            | 51.4 |
| <b>Year of first NOAC prescription</b> |                                 |      |                                      |      |                     |      |                   |      |
| 2011–2013                              | 3413                            | 14.1 | 513                                  | 12.5 | 527                 | 24.7 | 4453              | 14.6 |
| 2014–2016                              | 20,804                          | 85.9 | 3601                                 | 87.5 | 1609                | 75.3 | 26,014            | 85.4 |
| <b>BMI, kg/m<sup>2</sup></b>           |                                 |      |                                      |      |                     |      |                   |      |
| <20 (underweight)                      | 5553                            | 22.9 | 1047                                 | 25.4 | 502                 | 23.5 | 7102              | 23.3 |
| 20–24 (healthy weight)                 | 989                             | 4.1  | 201                                  | 4.9  | 79                  | 3.7  | 1269              | 4.2  |
| 25–29 (overweight)                     | 8456                            | 34.9 | 1530                                 | 37.2 | 739                 | 34.6 | 10,725            | 35.2 |
| ≥30 (obese)                            | 8296                            | 34.3 | 1134                                 | 27.6 | 739                 | 34.6 | 10,169            | 33.4 |
| Missing                                | 923                             | 3.8  | 202                                  | 4.9  | 77                  | 3.6  | 1202              | 3.9  |
| <b>Smoking</b>                         |                                 |      |                                      |      |                     |      |                   |      |
| Non-smoker                             | 9904                            | 40.9 | 1770                                 | 43.0 | 852                 | 39.9 | 12,526            | 41.1 |
| Smoker                                 | 1933                            | 8.0  | 273                                  | 6.6  | 131                 | 6.1  | 2337              | 7.7  |
| Ex-smoker                              | 12,359                          | 51.0 | 2068                                 | 50.3 | 1151                | 53.9 | 15,578            | 51.1 |
| Unknown                                | 21                              | 0.1  | 3                                    | 0.1  | 2                   | 0.1  | 26                | 0.1  |
| <b>Alcohol (units/week)</b>            |                                 |      |                                      |      |                     |      |                   |      |
| None                                   | 4780                            | 19.7 | 1042                                 | 25.3 | 526                 | 24.6 | 6348              | 20.8 |
| 1–9                                    | 10,870                          | 44.9 | 1827                                 | 44.4 | 978                 | 45.8 | 13,675            | 44.9 |
| 10–20                                  | 3968                            | 16.4 | 517                                  | 12.6 | 260                 | 12.2 | 4745              | 15.6 |
| 21–41                                  | 1541                            | 6.4  | 180                                  | 4.4  | 115                 | 5.4  | 1836              | 6.0  |
| ≥42                                    | 674                             | 2.8  | 88                                   | 2.1  | 55                  | 2.6  | 817               | 2.7  |
| Unknown                                | 2384                            | 9.8  | 460                                  | 11.2 | 202                 | 9.5  | 3046              | 10.0 |
| <b>CVD</b>                             |                                 |      |                                      |      |                     |      |                   |      |
| IHD                                    |                                 |      |                                      |      |                     |      |                   |      |
| Heart failure                          | 3853                            | 15.9 | 780                                  | 19.0 | 549                 | 25.7 | 5182              | 17.0 |
| Hypertension                           | 15,920                          | 65.7 | 2857                                 | 69.4 | 1617                | 75.7 | 20,394            | 66.9 |
| Ischaemic stroke                       | 3445                            | 14.2 | 754                                  | 18.3 | 388                 | 18.2 | 4587              | 15.1 |

|                                                             | Appropriately dosed<br>N=24,217 |      | Inappropriately underdosed<br>N=4114 |      | Overdosed<br>N=2136 |      | Total<br>N=30,467 |      |
|-------------------------------------------------------------|---------------------------------|------|--------------------------------------|------|---------------------|------|-------------------|------|
| <b>History of bleeding (GI, intracranial or urogenital)</b> | 6037                            | 24.9 | 1135                                 | 27.6 | 609                 | 28.5 | 7781              | 25.5 |
| <b>eGFR, ml/min/1.73m<sup>2</sup></b>                       |                                 |      |                                      |      |                     |      |                   |      |
| >50                                                         | 17,707                          | 73.1 | 2863                                 | 69.6 | 679                 | 31.8 | 21,249            | 69.7 |
| 30–50                                                       | 3017                            | 12.5 | 590                                  | 14.3 | 1175                | 55.0 | 4782              | 15.7 |
| <30                                                         | 385                             | 1.6  | 0                                    | 0.0  | 186                 | 8.7  | 571               | 1.9  |
| Missing                                                     | 3108                            | 12.8 | 661                                  | 16.1 | 96                  | 4.5  | 3865              | 12.7 |
| <b>Frailty index</b>                                        |                                 |      |                                      |      |                     |      |                   |      |
| Fit                                                         | 4005                            | 16.5 | 372                                  | 9.0  | 103                 | 4.8  | 4480              | 14.7 |
| Mild frailty                                                | 8912                            | 36.8 | 1218                                 | 29.6 | 579                 | 27.1 | 10,709            | 35.1 |
| Moderate frailty                                            | 7140                            | 29.5 | 1478                                 | 35.9 | 754                 | 35.3 | 9372              | 30.8 |
| Severe frailty                                              | 4160                            | 17.2 | 1046                                 | 25.4 | 700                 | 32.8 | 5906              | 19.4 |
| <b>CHA<sub>2</sub>DS<sub>2</sub>VASc score</b>              |                                 |      |                                      |      |                     |      |                   |      |
| ≤2                                                          | 7436                            | 30.7 | 703                                  | 17.1 | 246                 | 11.5 | 8385              | 27.5 |
| 3                                                           | 5095                            | 21.0 | 803                                  | 19.5 | 384                 | 18.0 | 6282              | 20.6 |
| ≥4                                                          | 11,686                          | 48.3 | 2608                                 | 63.4 | 1506                | 70.5 | 15,800            | 51.9 |
| <b>HAS-BLED score</b>                                       |                                 |      |                                      |      |                     |      |                   |      |
| 0                                                           | 10,841                          | 44.8 | 1529                                 | 37.2 | 588                 | 27.5 | 12,958            | 42.5 |
| 1–2                                                         | 8962                            | 37.0 | 1676                                 | 40.7 | 885                 | 41.4 | 11,523            | 37.8 |
| ≥3                                                          | 4414                            | 18.2 | 909                                  | 22.1 | 663                 | 31.0 | 5986              | 19.6 |

BMI, body mass index; CVD, cardiovascular disease; eGFR, estimated glomerular filtration rate; GI, gastrointestinal; OAC, oral anticoagulant; NOAC, non-vitamin K oral anticoagulant; NVAf, non-valvular atrial fibrillation; SD, standard deviation
