# Supplementary material for: Appropriateness of initial dose of non-vitamin K antagonist oral anticoagulants in patients with non-valvular atrial fibrillation in the UK
Source: PubMed Central journal article supplement — BMJ Open. 2019 Sep 20;9(9):e031341. doi: 10.1136/bmjopen-2019-031341 (PMC6756330; doi:10.1136/bmjopen-2019-031341), 2019-09-20
Supplement: bmjopen-2019-031341supp006.pdf [file bmjopen-2019-031341supp006.pdf]

**Supplementary Table 4a.** Appropriateness of the dose of the first NOAC prescription according to the EU drug label among patients with NVAF, stratified by previous use of an oral anticoagulant (naïve/non-naïve).

| ALL NOACs          | Naïve patients<br>N=14,807 (48.6%) |      | Non-naïve<br>N=15,660 (51.4%) |      | Total<br>N=30,467 |      |
|--------------------|------------------------------------|------|-------------------------------|------|-------------------|------|
|                    | n                                  | %    | n                             | %    | n                 | %    |
| Appropriate dose   | 11,924                             | 80.5 | 12,293                        | 78.5 | 24,217            | 79.5 |
| Inappropriate dose | 2883                               | 19.5 | 3367                          | 21.5 | 6250              | 20.5 |

EU, European Union; NOAC, non-vitamin K antagonist oral anticoagulant; NVAF, non-valvular atrial fibrillation

**Supplementary Table 4b.** Appropriateness of the dose of the first apixaban prescription according to the EU drug label among patients with NVAF, stratified by previous use of an oral anticoagulant (naïve/non-naïve).

| Apixaban           | Naïve patients<br>N=5774 (53.3%) |      | Non-naïve<br>N=5060 (46.7%) |      | Total<br>N=10,834 |      |
|--------------------|----------------------------------|------|-----------------------------|------|-------------------|------|
|                    | n                                | %    | n                           | %    | n                 | %    |
| Appropriate dose   | 4405                             | 76.3 | 3705                        | 73.2 | 8110              | 74.9 |
| Inappropriate dose | 1369                             | 23.7 | 1355                        | 26.8 | 2724              | 25.1 |

EU, European Union; NOAC, non-vitamin K antagonist oral anticoagulant; NVAF, non-valvular atrial fibrillation

**Supplementary Table 4c.** Appropriateness of the dose of the first dabigatran prescription according to the EU drug label among patients with NVAF, stratified by previous use of an oral anticoagulant (naïve/non-naïve).

| Dabigatran         | Naïve patients<br>N=1827 (41.7%) |      | Non-naïve<br>N=2554 (58.3%) |      | Total<br>N=4381 |      |
|--------------------|----------------------------------|------|-----------------------------|------|-----------------|------|
|                    | n                                | %    | n                           | %    | n               | %    |
| Appropriate dose   | 1383                             | 75.7 | 1875                        | 73.4 | 3258            | 74.4 |
| Inappropriate dose | 444                              | 24.3 | 679                         | 26.6 | 1123            | 25.6 |

EU, European Union; NOAC, non-vitamin K antagonist oral anticoagulant; NVAF, non-valvular atrial fibrillation

**Supplementary Table 4d.** Appropriateness of the dose of the first rivaroxaban prescription according to the EU drug label among patients with NVAF, stratified by previous use of an oral anticoagulant (naïve/non-naïve).

| Rivaroxaban        | Naïve patients<br>N=7206 (47.2%) |      | Non-naïve<br>N=8046 (52.8%) |      | Total<br>N=15,252 |      |
|--------------------|----------------------------------|------|-----------------------------|------|-------------------|------|
|                    | n                                | %    | n                           | %    | n                 | %    |
| Appropriate dose   | 6136                             | 85.2 | 6713                        | 83.4 | 12849             | 84.2 |
| Inappropriate dose | 1070                             | 14.8 | 1333                        | 16.6 | 2403              | 15.8 |

EU, European Union; NOAC, non-vitamin K antagonist oral anticoagulant; NVAF, non-valvular atrial fibrillation
