# Supplementary material for: Appropriateness of initial dose of non-vitamin K antagonist oral anticoagulants in patients with non-valvular atrial fibrillation in the UK
Source: PubMed Central journal article supplement — BMJ Open. 2019 Sep 20;9(9):e031341. doi: 10.1136/bmjopen-2019-031341 (PMC6756330; doi:10.1136/bmjopen-2019-031341), 2019-09-20
Supplement: bmjopen-2019-031341supp007.pdf [file bmjopen-2019-031341supp007.pdf]

**Supplementary Table 5.** Daily dose of NOAC 6 months after the index date among patients with NVAF with at least 6 months' follow-up and still using a NOAC at 6 months.

|                               | Lower dose than the index NOAC prescription |     | Same dose than the index NOAC prescription |      | Higher dose than the index NOAC prescription |     | Patients with at least 6 months' follow-up and who were still prescribed a NOAC at 6 months | Total patients with NVAF in the study |
|-------------------------------|---------------------------------------------|-----|--------------------------------------------|------|----------------------------------------------|-----|---------------------------------------------------------------------------------------------|---------------------------------------|
|                               | n                                           | %   | n                                          | %    | n                                            | %   |                                                                                             |                                       |
| <b>Apixaban (N=6783)</b>      | 129                                         | 1.9 | 6362                                       | 95.4 | 201                                          | 3.0 | <b>6667</b>                                                                                 | <b>10,834</b>                         |
| <b>Dabigatran (N=2874)</b>    | 72                                          | 2.5 | 2648                                       | 93.7 | 107                                          | 3.8 | <b>2827</b>                                                                                 | <b>4381</b>                           |
| <b>Rivaroxaban (N=10,068)</b> | 325                                         | 3.3 | 9265                                       | 95.0 | 160                                          | 1.6 | <b>9750</b>                                                                                 | <b>15,252</b>                         |
|                               |                                             |     |                                            |      |                                              |     | <b>19,244</b>                                                                               | <b>30,467</b>                         |

NOAC, non-vitamin K antagonist oral anticoagulant, NVAF, non-valvular atrial fibrillation
