# Supplementary material for: Appropriateness of initial dose of non-vitamin K antagonist oral anticoagulants in patients with non-valvular atrial fibrillation in the UK
Source: PubMed Central journal article supplement — BMJ Open. 2019 Sep 20;9(9):e031341. doi: 10.1136/bmjopen-2019-031341 (PMC6756330; doi:10.1136/bmjopen-2019-031341), 2019-09-20
Supplement: bmjopen-2019-031341supp008.pdf [file bmjopen-2019-031341supp008.pdf]

**Supplementary Table 6.** Dose of the index NOAC prescription among patients with and without a NOAC prescription at 6 months.

| Index NOAC         | Patients with at least 6 months of follow-up and still prescribed a NOAC at 6 months |      | Patients not prescribed a NOAC at 6 months (i.e. remaining patients) |      | TOTAL           |      |
|--------------------|--------------------------------------------------------------------------------------|------|----------------------------------------------------------------------|------|-----------------|------|
| <b>Apixaban</b>    | <b>N=6667</b>                                                                        |      | <b>N=4167</b>                                                        |      | <b>N=10,834</b> |      |
|                    | n                                                                                    | %    | n                                                                    | %    | n               | %    |
| 5 mg               | 2258                                                                                 | 33.9 | 1515                                                                 | 36.4 | 3773            | 34.8 |
| 10 mg              | 4409                                                                                 | 66.1 | 2652                                                                 | 63.6 | 7061            | 65.2 |
| <b>Dabigatran</b>  | <b>N=2827</b>                                                                        |      | <b>N=1554</b>                                                        |      | <b>N=4381</b>   |      |
|                    | n                                                                                    | %    | n                                                                    | %    | n               | %    |
| 110 mg             | 63                                                                                   | 2.2  | 38                                                                   | 2.4  | 101             | 2.3  |
| 150 mg             | 131                                                                                  | 4.6  | 65                                                                   | 4.2  | 196             | 4.5  |
| 220 mg             | 1290                                                                                 | 45.6 | 776                                                                  | 49.9 | 2066            | 47.2 |
| 300 mg             | 1343                                                                                 | 47.5 | 675                                                                  | 43.4 | 2018            | 46.1 |
| <b>Rivaroxaban</b> | <b>N=9750</b>                                                                        |      | <b>N=5502</b>                                                        |      | <b>N=15,252</b> |      |
|                    | n                                                                                    | %    | n                                                                    | %    | n               | %    |
| 10 mg              | 246                                                                                  | 2.5  | 144                                                                  | 2.6  | 390             | 2.6  |
| 15 mg              | 1648                                                                                 | 16.9 | 1043                                                                 | 19.0 | 2691            | 17.6 |
| 20 mg              | 7819                                                                                 | 80.2 | 4272                                                                 | 77.6 | 12,091          | 79.3 |
| ≥30 mg             | 37                                                                                   | 0.3  | 43                                                                   | 0.8  | 80              | 0.5  |

NOAC, non-vitamin K antagonist oral anticoagulant
